# Supplementary material for: Downregulation of miR-211-5p Promotes Carboplatin Resistance in Human Retinoblastoma Y79 Cells by Affecting the GDNF–LIF Interaction
Source: Front Oncol. 2022 Mar 2;12:848733. doi: 10.3389/fonc.2022.848733 (PMC8925320; doi:10.3389/fonc.2022.848733)
Supplement: Supplementary Table 3 — All results of GSEA analysis. [file Table_3.xlsx]

## Sheet: Sheet1
ONTOLOGY	ID	Description	setSize	enrichmentScore	NES	pvalue	p.adjust	qvalues	rank	leading_edge	core_enrichment
CC	GO:0097733	photoreceptor cell cilium	100	0.548583	1.91855	0.00143885	0.00143885	0.0144916	2800	tags=43%	list=17%	signal=36%	9249/24/10461/25861/5149/5145/22941/6094/167691/1258/6295/5158/124590/115861/51761/4131/346007/10518/2978/768206/2779/4644/407/5132/79955/778/55212/10806/55812/90410/5873/51332/5470/4867/92211/2782/585/9657/6011/2767/94137/57096/261734
BP	GO:1902807	negative regulation of cell cycle G1/S phase transition	101	0.548276	1.92313	0.00143678	0.00143678	0.0144916	2725	tags=40%	list=16%	signal=33%	10769/1026/4193/2810/1647/55367/2273/9314/1820/144455/7832/1030/1263/123879/1032/5934/79791/28984/25946/56241/4194/581/10457/79027/5925/51065/79960/1029/138151/472/5728/51512/51499/26058/5111/1027/1031/6347/995/57060
CC	GO:0097731	9+0 non-motile cilium	101	0.544946	1.91145	0.00143678	0.00143678	0.0144916	2800	tags=43%	list=17%	signal=36%	9249/24/10461/25861/5149/5145/22941/6094/167691/1258/6295/5158/124590/115861/51761/4131/346007/10518/2978/768206/2779/4644/407/5132/79955/778/55212/10806/55812/90410/5873/51332/5470/4867/92211/2782/585/9657/6011/2767/94137/57096/261734
BP	GO:0003014	renal system process	101	0.538453	1.88868	0.00143678	0.00143678	0.0144916	878	tags=20%	list=5%	signal=19%	55959/4645/1136/1813/5800/50484/133/9368/2621/221395/134/6446/108/2934/5020/8529/1535/65266/56302/1364
BP	GO:0050953	sensory perception of light stimulus	193	0.513565	1.94954	0.00132275	0.00132275	0.0144916	2055	tags=29%	list=12%	signal=26%	10002/3983/27241/9249/4901/24/25861/5149/5145/6094/5957/50700/6004/1258/140469/80781/2570/5158/2743/24139/124590/6247/84839/51761/285440/26504/582/2055/6096/346007/4649/2978/93589/768206/8787/9094/2779/4644/594855/7546/407/128338/5132/3913/778/5950/92840/55212/55812/9478/5470/5147/23746/1415/1412/1261
MF	GO:0005201	extracellular matrix structural constituent	139	0.507194	1.84993	0.00138122	0.00138122	0.0144916	1603	tags=21%	list=10%	signal=19%	10085/3490/1462/3909/4811/2006/1294/2192/4240/284217/1308/80781/3339/4052/3371/1291/7448/1289/7837/11117/79875/3491/340267/7058/10516/258/3913/50509/3915
CC	GO:0043679	axon terminus	111	0.506747	1.79492	0.00143885	0.00143885	0.0144916	1235	tags=20%	list=7%	signal=18%	8492/10874/4842/3747/1813/3737/1174/1258/112476/6622/23208/2043/134/10814/5020/4919/7349/3749/3738/8867/5173/594855
CC	GO:0097730	non-motile cilium	131	0.502247	1.81572	0.00141443	0.00141443	0.0144916	2800	tags=37%	list=17%	signal=31%	9249/24/10461/25861/5149/5145/22941/6094/167691/1813/1258/6295/5158/124590/115861/51761/4131/346007/10518/2978/768206/2779/4644/407/5132/79955/778/55212/10806/55812/90410/5873/51332/10888/5470/4867/92211/161582/2782/54806/585/9657/2847/6011/2767/94137/57096/261734
BP	GO:0007601	visual perception	191	0.501103	1.8982	0.0013245	0.0013245	0.0144916	2055	tags=28%	list=12%	signal=25%	10002/3983/27241/9249/4901/24/5149/5145/6094/5957/50700/6004/1258/140469/80781/2570/5158/2743/24139/6247/84839/51761/285440/26504/582/2055/6096/346007/4649/2978/93589/768206/8787/9094/2779/4644/594855/7546/407/128338/5132/3913/778/5950/92840/55212/55812/9478/5470/5147/23746/1415/1412/1261
MF	GO:0005319	lipid transporter activity	112	0.500745	1.77841	0.00143472	0.00143472	0.0144916	2531	tags=31%	list=15%	signal=27%	26031/24/347/26154/10347/55754/9600/114884/23461/134429/23762/51761/9619/10349/57476/28965/634/5360/388121/121601/80765/57655/5950/10350/23460/9854/10599/153768/114876/336/5007/5825/51499/79963/9885
MF	GO:0005088	Ras guanyl-nucleotide exchange factor activity	131	0.496283	1.79416	0.00141443	0.00141443	0.0144916	2325	tags=31%	list=14%	signal=26%	81846/50650/1795/9467/2059/85442/9639/23179/10451/7410/6764/27147/23101/414918/55701/221178/89846/25791/84033/50649/50618/23229/26230/55160/6305/57480/64787/1102/7074/8874/23370/11214/57589/203228/139818/22898/7409/25782/23258/27342
BP	GO:0042752	regulation of circadian rhythm	102	0.493822	1.73115	0.00143885	0.00143885	0.0144916	2059	tags=21%	list=12%	signal=18%	3398/10874/220202/1813/100/3737/8553/134/55294/8863/55124/9572/6096/7071/406/10891/1815/5601/7153/107/1453
BP	GO:0009581	detection of external stimulus	117	0.491066	1.75542	0.00142248	0.00142248	0.0144916	1623	tags=26%	list=10%	signal=24%	10002/24/25861/5145/2294/5957/1258/6295/9600/5158/5270/134/1040/6247/51761/7852/5475/346007/2978/93589/80036/9094/2779/6785/23621/3728/5132/79955/801/778/92840
BP	GO:0031960	response to corticosteroid	139	0.490945	1.79066	0.00138122	0.00138122	0.0144916	2078	tags=26%	list=12%	signal=23%	3490/1036/1026/6382/2908/6586/1373/2353/2308/133/301/2322/2022/5724/5020/1535/7352/7349/4747/4851/15/5069/1843/10076/7298/8061/121278/153222/196541/3651/10888/11214/6678/336/1261/572
BP	GO:0044774	mitotic DNA integrity checkpoint	104	0.489958	1.72042	0.00142653	0.00142653	0.0144916	3031	tags=35%	list=18%	signal=28%	10769/1026/4193/2810/1647/55367/1820/7508/144455/7832/1263/5934/79791/28984/25946/4194/581/51065/7153/57551/472/84446/29997/51512/51499/26058/5111/1027/995/57060/51149/8091/144715/80279/146956/3364
BP	GO:0051384	response to glucocorticoid	125	0.489345	1.75811	0.00143062	0.00143062	0.0144916	2078	tags=26%	list=12%	signal=23%	3490/1036/1026/6382/2908/6586/1373/2353/2308/133/301/2322/5724/5020/7352/7349/4747/15/5069/1843/10076/7298/8061/121278/153222/196541/3651/10888/11214/6678/336/572
BP	GO:0001894	tissue homeostasis	192	0.488575	1.85329	0.00132275	0.00132275	0.0144916	1752	tags=21%	list=11%	signal=19%	5745/3635/760/5166/7031/24/25861/2185/167691/26154/1435/1258/3988/2103/221395/124590/115861/6794/582/2055/84959/10518/4851/1512/5880/10413/22954/2624/5578/6662/29123/128338/581/567/29887/57482/27347/5950/171392/55812/5925
CC	GO:0044306	neuron projection terminus	128	0.485546	1.74724	0.00142653	0.00142653	0.0144916	2827	tags=28%	list=17%	signal=24%	8492/10874/4842/3747/1813/3737/1174/1258/112476/6622/23208/2043/134/10814/5020/4919/7349/3749/3738/8867/85300/5173/594855/22848/8514/2643/152/2901/8943/645/57657/23025/9256/64780/2805/1742
BP	GO:0050806	positive regulation of synaptic transmission	150	0.484173	1.78039	0.00137552	0.00137552	0.0144916	2866	tags=33%	list=17%	signal=27%	10769/760/10874/6507/2185/22941/1813/9001/1268/2905/59284/776/9378/4355/6622/6616/2043/5270/134/26045/5020/23237/64084/5621/5999/794/6812/27065/18/7305/116841/1815/8878/3799/107/10858/2903/5728/5865/253980/22883/23025/4920/10590/6347/135/440275/1742/5590
BP	GO:0030330	DNA damage response	signal transduction by p53 class mediator	102	0.477746	1.67479	0.0028777	0.0028777	0.0213858	1332	tags=20%	list=8%	signal=18%	10769/1026/4193/2810/1647/5366/55367/4646/8493/1820/340485/144455/7832/1263/200734/5934/28984/25946/4194/581
MF	GO:0008201	heparin binding	130	0.47575	1.71733	0.00142653	0.00142653	0.0144916	1583	tags=22%	list=10%	signal=20%	4745/2247/6359/5228/1056/4753/6586/64388/6402/4023/9289/59352/5270/8829/1839/307/7448/1289/143282/566/64100/3491/462/59271/10457/7058/333/50509
BP	GO:0009582	detection of abiotic stimulus	119	0.474627	1.69767	0.00143472	0.00143472	0.0144916	1623	tags=25%	list=10%	signal=23%	10002/24/25861/5145/5957/1258/6295/9600/5158/5270/134/1040/6247/51761/7852/5475/346007/2978/93589/80036/9094/2779/6785/23621/3728/5132/79955/801/778/92840
BP	GO:0015850	organic hydroxy compound transport	197	0.471807	1.79855	0.00131062	0.00131062	0.0144916	2932	tags=31%	list=18%	signal=26%	2668/26031/4842/6623/1056/1813/1268/3931/26154/3737/64137/4035/10347/6622/23208/114884/23461/134429/23762/5020/80055/9619/57476/7349/4790/634/5360/6526/127833/51760/18/80765/6861/57655/255738/5950/26119/29881/1815/9123/152/10599/114876/302/3745/336/5007/133418/10499/5865/57586/9885/6342/23673/10765/948/135/1066/6850/1191/364/114897
BP	GO:0008217	regulation of blood pressure	143	0.471145	1.72364	0.00138504	0.00138504	0.0144916	1736	tags=20%	list=10%	signal=18%	3398/10874/5144/4842/1813/1268/5800/80852/133/2621/50848/1907/134/6446/5724/28514/5020/8529/23576/1535/7349/2053/143872/7137/18/27347/6051/59/2643
BP	GO:0014013	regulation of gliogenesis	105	0.47047	1.65491	0.002849	0.002849	0.0213147	2183	tags=25%	list=13%	signal=22%	3398/5803/3400/54209/1435/4035/1746/3280/3976/2016/2043/5270/7852/26022/9572/4851/84630/7161/2119/7074/4036/118738/89927/22933/4049/6663
CC	GO:0150034	distal axon	275	0.468334	1.84024	0.00125156	0.00125156	0.0144916	2382	tags=27%	list=14%	signal=23%	9638/8492/2823/10874/4842/3747/25861/2185/22941/1813/1268/5800/3737/4035/2059/1174/1258/112476/4133/6622/6616/23208/2043/134/8829/323/3800/10814/5020/4131/81551/22902/4919/7349/3749/3738/4649/4747/8867/4885/7402/25791/5173/4644/80315/594855/149371/56104/22848/26230/8633/55118/393/29767/9266/9585/8514/3675/23242/7074/22906/23467/152/322/203228/3799/2901/8943/22933/84446/645/1500/23022/57657
BP	GO:1903052	positive regulation of proteolysis involved in cellular protein catabolic process	113	0.467729	1.65943	0.00143885	0.00143885	0.0144916	2450	tags=26%	list=15%	signal=22%	10769/4193/54209/2185/154214/255488/55294/1263/440730/10221/122809/4780/2729/26263/127544/85409/55212/5347/93974/5601/91304/1453/22933/6449/5728/29997/3300/1454/25897
BP	GO:1902107	positive regulation of leukocyte differentiation	120	0.465417	1.66443	0.00144092	0.00144092	0.0144916	1279	tags=18%	list=8%	signal=16%	3635/760/3398/4254/8744/54209/100/2353/3725/1435/301/2621/3976/7535/51043/7071/10221/56998/5578/4179/3965
MF	GO:0005539	glycosaminoglycan binding	175	0.464802	1.74408	0.00133333	0.00133333	0.0144916	1583	tags=21%	list=10%	signal=19%	4745/55959/1462/2247/6359/5228/54209/1056/4753/6586/64388/6402/4023/9289/59352/2022/5270/8829/1839/5621/307/7448/1289/143282/10392/566/3098/9806/64100/3491/462/59271/10457/7058/333/50509
BP	GO:0071156	regulation of cell cycle arrest	101	0.464638	1.62976	0.00431034	0.00431034	0.0246024	1332	tags=17%	list=8%	signal=16%	10769/1026/3398/4193/2810/1647/55367/1820/144455/7832/1263/5934/28984/25946/7161/4194/581
BP	GO:0022612	gland morphogenesis	114	0.461922	1.64106	0.001443	0.001443	0.0144916	1332	tags=19%	list=8%	signal=18%	1999/55959/3400/4488/6778/1435/284217/9368/59277/3169/1969/8829/3371/780/55294/10512/4851/10481/634/6195/6662/581
BP	GO:0009612	response to mechanical stimulus	184	0.45759	1.72561	0.00132979	0.00132979	0.0144916	2255	tags=24%	list=14%	signal=21%	6507/25861/2185/1813/1647/2353/3725/9378/5493/9531/7132/8795/2022/5270/7508/26047/3371/51761/2115/7832/7852/1535/4131/7349/4790/6662/2729/23621/3728/10628/5138/79955/8061/54407/3249/5601/5723/572/8932/58/54532/5734/3627/6262/664
BP	GO:0060041	retina development in camera-type eye	142	0.455885	1.66549	0.00139082	0.00139082	0.0144916	1601	tags=19%	list=10%	signal=17%	10002/2823/43/4901/10461/5145/6094/220202/284217/1746/5158/8829/121643/6247/28514/51761/8322/2055/6096/5979/3975/2779/6662/581/6240/3913/5950
CC	GO:0030426	growth cone	169	0.454307	1.70332	0.0013245	0.0013245	0.0144916	2011	tags=25%	list=12%	signal=23%	9638/2823/25861/2185/22941/1268/5800/4035/2059/4133/6622/6616/2043/8829/323/3800/4131/81551/22902/4649/4747/4885/7402/25791/4644/80315/149371/56104/26230/8633/55118/393/29767/9266/9585/3675/23242/7074/22906/23467/322/203228/3799
BP	GO:0008277	regulation of G protein-coupled receptor signaling pathway	123	0.453171	1.62527	0.00431655	0.00431655	0.0246024	1702	tags=24%	list=10%	signal=21%	4842/5149/5145/1813/100/57561/133/6004/1258/6295/6622/5158/2696/2922/2786/5475/5999/2978/8787/718/2779/5578/23295/407/333/801/29767/5997/112609
BP	GO:0007093	mitotic cell cycle checkpoint	162	0.451962	1.67846	0.0013587	0.0013587	0.0144916	3442	tags=35%	list=21%	signal=28%	10769/1026/4193/2810/1647/7483/55367/1820/7508/144455/7832/56155/1030/1263/5934/79791/28984/1843/25946/84936/4194/581/81620/5347/5925/598/51065/7153/57551/472/84446/29997/51512/51499/26058/5111/1027/55755/84861/1063/10459/995/57060/51149/8091/144715/80279/146956/348654/3364/11130/983/54908/1386/51451/23019/7465
BP	GO:0048871	multicellular organismal homeostasis	418	0.451357	1.83887	0.00117509	0.00117509	0.0144916	1752	tags=20%	list=11%	signal=18%	5745/3635/760/4645/5166/57822/43/10874/7031/24/25861/2810/2185/167691/1813/1268/6778/26154/57561/1435/2308/4858/1258/3988/2103/221395/1907/134/124590/6337/28514/115861/108/30061/5020/8529/7852/1649/7480/9572/6794/56034/582/2055/79152/51043/84959/1364/10518/4851/1512/406/5880/10413/22954/5565/10891/2624/5578/6662/3516/29123/23178/128338/581/5564/18/567/29887/57482/6774/27347/5950/242/55818/23228/1…
BP	GO:0070665	positive regulation of leukocyte proliferation	104	0.451192	1.5843	0.0042796	0.0042796	0.0246024	1334	tags=14%	list=8%	signal=13%	1026/4254/8744/100/1435/301/3280/10451/7535/3133/29126/58515/4179/3965/1947
BP	GO:0002040	sprouting angiogenesis	102	0.451113	1.58142	0.00431655	0.00431655	0.0246024	1117	tags=17%	list=7%	signal=16%	10769/2247/5228/2185/301/9314/1969/8829/28514/55294/144455/23670/51564/4851/634/6271/2624
BP	GO:0097305	response to alcohol	196	0.450249	1.7155	0.00131234	0.00131234	0.0144916	2267	tags=24%	list=14%	signal=21%	3490/1036/1026/3747/2185/1813/1268/6586/2353/2059/9314/57578/1946/3371/3248/1938/108/2934/5020/54331/1535/57476/5999/4747/94241/15/2770/3728/18/7298/8061/929/57655/4880/6774/5950/5997/598/1815/6678/107/2903/572/5734/112/5728/2782
BP	GO:1903364	positive regulation of cellular protein catabolic process	133	0.448981	1.63125	0.0027933	0.0027933	0.0210391	2478	tags=25%	list=15%	signal=21%	10769/4193/54209/2185/154214/4035/255488/55294/1263/440730/10221/122809/4780/2729/26263/127544/85409/255738/55212/5347/93974/5601/4036/91304/1453/22933/6449/5728/29997/3300/1454/25897/26234
BP	GO:0051101	regulation of DNA binding	118	0.448761	1.60197	0.00432277	0.00432277	0.0246024	1884	tags=21%	list=11%	signal=19%	124857/3398/3400/4488/3399/3725/3280/3976/9314/341405/55294/1649/84444/56998/64324/55355/4751/9421/146198/81620/171392/201501/3397/5925/3651
BP	GO:2000045	regulation of G1/S transition of mitotic cell cycle	142	0.448301	1.63778	0.00139082	0.00139082	0.0144916	2725	tags=29%	list=16%	signal=24%	10769/1026/3398/4193/2810/1647/55367/301/2273/9314/1820/144455/7832/1030/1263/123879/1032/5934/79791/28984/25946/4194/581/10457/79027/5925/51065/79960/1029/138151/472/5728/51512/51499/26058/5111/1027/1031/6347/995/57060
BP	GO:0061337	cardiac conduction	126	0.448031	1.61275	0.00423729	0.00423729	0.0246024	1795	tags=21%	list=11%	signal=19%	6330/53826/5144/4842/3775/492/489/59284/3761/776/487/55799/5349/53822/785/59285/817/30819/93589/3708/3728/6331/801/778/4880/3768/10142
BP	GO:0008016	regulation of heart contraction	214	0.447808	1.72178	0.00129534	0.00129534	0.0144916	1866	tags=22%	list=11%	signal=20%	6330/53826/10874/4193/5144/4842/3775/1813/100/492/489/59284/3761/133/776/487/55799/5349/1907/53822/134/1839/121643/5020/785/5999/59285/7349/817/4634/30819/10659/93589/3708/6271/7137/3728/6331/801/778/4880/5997/3768/9722/2643/10142/79041
CC	GO:0045111	intermediate filament cytoskeleton	110	0.447671	1.58398	0.0071736	0.0071736	0.0304214	2716	tags=28%	list=16%	signal=24%	5630/3872/22941/286077/5493/8829/6595/7431/4744/144501/6511/4747/126917/4000/4644/387264/3728/83481/440021/23499/3856/26119/23336/2125/6249/631/4323/1832/85302/64780/135
BP	GO:0062013	positive regulation of small molecule metabolic process	113	0.44694	1.58567	0.0057554	0.0057554	0.0291206	1740	tags=20%	list=10%	signal=18%	5745/4842/54209/5957/10580/5366/2308/133/301/2103/6622/134429/5724/9619/9572/5209/2978/4790/10891/6774/3481/26119/1374
CC	GO:0030427	site of polarized growth	174	0.445293	1.666	0.00134228	0.00134228	0.0144916	2011	tags=25%	list=12%	signal=22%	9638/2823/25861/2185/22941/1268/5800/4035/2059/4133/6622/6616/2043/8829/323/3800/4131/81551/22902/4649/4747/4885/7402/25791/4644/80315/149371/56104/26230/8633/55118/393/29767/9266/9585/3675/23242/7074/22906/23467/322/203228/3799
BP	GO:0042476	odontogenesis	115	0.444349	1.57865	0.00434783	0.00434783	0.0246024	1959	tags=23%	list=12%	signal=21%	760/6382/4488/3399/1435/2308/133/1746/3371/80320/26504/130497/4644/9622/29123/581/9421/6331/657/123041/29887/258/54084/80326/58524/4038/5054
CC	GO:0098858	actin-based cell projection	183	0.443774	1.67514	0.00132626	0.00132626	0.0144916	2177	tags=25%	list=13%	signal=22%	760/84958/26031/2823/4254/83715/25861/3685/2059/9368/140469/4133/2043/5064/4646/3169/22902/794/389/10518/4885/634/7402/221178/4644/88/4430/79955/374403/200958/26230/8633/523/54084/64787/8639/59/3675/3636/90410/23467/1836/322/5154/58/112
CC	GO:0043296	apical junction complex	135	0.443042	1.61267	0.00277778	0.00277778	0.0210391	2291	tags=26%	list=14%	signal=23%	81607/122786/8825/27134/10580/9414/24146/143162/50848/51421/57662/57125/84952/9863/84552/4810/65266/1364/8531/3728/83481/57619/11346/79778/9618/154810/9266/5912/9080/4867/54532/54566/7122/55870/1500
BP	GO:0010508	positive regulation of autophagy	111	0.442798	1.56841	0.00719424	0.00719424	0.0304214	3849	tags=36%	list=23%	signal=28%	10769/26353/2308/27244/9531/143686/10346/10133/1263/54832/6794/10392/94241/79156/23677/83667/5305/93974/203228/572/207063/25782/664/201163/665/5563/5899/440275/3458/55626/9528/3064/51322/10018/2309/120892/65018/7248/140775/8396
BP	GO:0019751	polyol metabolic process	109	0.441809	1.56129	0.00862069	0.00862069	0.0339209	1755	tags=18%	list=11%	signal=17%	5745/3635/2247/117283/2185/3628/6622/5724/340485/8867/9108/130367/8811/6526/84812/801/23228/9677/2643/3636
MF	GO:0005178	integrin binding	117	0.439933	1.57264	0.00711238	0.00711238	0.0304214	1871	tags=22%	list=11%	signal=20%	10085/2247/3909/5803/3685/4240/3693/8745/7448/1289/10518/84978/11117/7402/8174/5578/3491/88/10457/10516/3913/87/3481/3675/57126/3084
BP	GO:0000077	DNA damage checkpoint	142	0.439625	1.60609	0.00278164	0.00278164	0.0210391	3318	tags=33%	list=20%	signal=27%	10769/1026/4193/2810/1647/55367/1820/7508/144455/7832/84444/1263/5934/79791/28984/25946/4194/581/5347/51065/57551/51343/472/84446/29997/51512/51499/26058/5111/1027/995/57060/440275/51149/83990/8091/8682/144715/80279/51514/83695/146956/3364/983/9575/1386/51322
BP	GO:0007623	circadian rhythm	184	0.437512	1.64989	0.00132979	0.00132979	0.0144916	2399	tags=23%	list=14%	signal=20%	3398/10874/3400/220202/1813/100/3399/3737/3725/8553/134/9956/55294/8863/55124/9572/6096/1364/7071/1644/406/15/10891/8204/10887/7298/121278/79365/4804/1374/3397/1815/5601/7153/5054/55366/107/1453/10499/5728/1406/1454
BP	GO:0019935	cyclic-nucleotide-mediated signaling	155	0.436489	1.61144	0.0013624	0.0013624	0.0144916	2803	tags=30%	list=17%	signal=25%	5745/5144/4842/3747/2185/1813/57561/133/9368/9289/2696/108/54331/7349/2774/27445/8811/2770/5578/6662/23295/5138/333/4880/5997/112609/576/152/11214/5744/55366/107/5739/5734/112/3627/8844/2782/5573/2849/10672/23551/948/118442/135/2827/90226
BP	GO:0015893	drug transport	164	0.435976	1.62261	0.00134953	0.00134953	0.0144916	1679	tags=20%	list=10%	signal=18%	2668/26266/760/148641/6507/6623/1136/1813/1268/3737/55244/6622/55754/23208/388662/114757/4151/8322/5999/2055/7349/6511/127833/11230/51760/18/6861/6512/123096/113235/284439/5997
BP	GO:0048660	regulation of smooth muscle cell proliferation	119	0.434357	1.55363	0.0071736	0.0071736	0.0304214	1646	tags=15%	list=10%	signal=14%	2247/1026/3398/4193/347/2006/3725/9314/5724/1839/3248/1535/10221/10891/56998/657/4880/26119
MF	GO:0019838	growth factor binding	121	0.434193	1.55618	0.00857143	0.00857143	0.0339209	1677	tags=20%	list=10%	signal=18%	3490/124857/3587/3685/9001/2022/3487/4052/8829/3977/3489/1291/1289/7837/143282/1843/3491/6331/657/85409/23105/4804/2817/9702
BP	GO:0072006	nephron development	124	0.433996	1.55939	0.00858369	0.00858369	0.0339209	1738	tags=19%	list=10%	signal=17%	2668/55959/2247/5228/342184/4811/5800/3280/3976/28514/9863/130497/65266/5979/4851/3975/10413/182/56998/6662/10736/3913/59/3675
BP	GO:0048659	smooth muscle cell proliferation	120	0.43364	1.55079	0.00720461	0.00720461	0.0304214	1646	tags=15%	list=10%	signal=14%	2247/1026/3398/4193/347/2006/3725/9314/5724/1839/3248/1535/10221/10891/56998/657/4880/26119
BP	GO:0009416	response to light stimulus	286	0.433299	1.70755	0.00125	0.00125	0.0144916	1530	tags=17%	list=9%	signal=16%	10002/1026/3398/10874/4193/3747/6507/24/5145/1643/5957/1813/5295/338811/2353/8553/1258/6295/9600/5158/90427/7508/1040/6247/51761/8863/5429/5475/51435/6794/123879/346007/1032/5934/94241/2978/15/22954/93589/1843/9094/2779/6785/5132/581/11346/801/778
MF	GO:0015081	sodium ion transmembrane transporter activity	125	0.433271	1.55665	0.00572246	0.00572246	0.0291206	2392	tags=18%	list=14%	signal=16%	6330/26266/6507/3775/284525/9058/388662/6528/6337/9498/2900/26504/6511/6526/6331/123041/6326/6529/10568/2901/389015/57657/6340
BP	GO:0008544	epidermis development	271	0.432189	1.69408	0.00126263	0.00126263	0.0144916	2103	tags=22%	list=13%	signal=19%	1999/3909/57822/55283/10468/3872/60401/25861/4488/2810/1294/79755/26154/1308/301/9368/5493/3280/9314/23254/1969/28514/7480/79152/4909/144501/1514/224/58495/4851/10481/10413/182/2355/4644/387264/6662/3516/3728/10628/8323/440021/5017/79955/5453/3856/80326/4665/4926/5660/11078/4097/3229/5744/4038/55366/3643/2125/5154
BP	GO:0007050	cell cycle arrest	222	0.431146	1.6557	0.00130719	0.00130719	0.0144916	2794	tags=28%	list=17%	signal=24%	10769/1026/3398/4193/2810/8522/1647/55367/8850/2621/54766/4853/1820/323/100144748/144455/7832/9863/1649/1030/5621/1263/7480/6794/1032/5934/53632/94241/4851/28984/1843/5565/10669/25946/7161/11186/4194/1028/581/5564/58528/127933/9585/5925/1029/322/4824/472/8812/51512/51499/5111/6498/1027/5563/1031/220296/995/57060/440275/8091/79648
MF	GO:0005516	calmodulin binding	184	0.430264	1.62256	0.00132979	0.00132979	0.0144916	2904	tags=32%	list=17%	signal=26%	4645/2669/4842/6236/492/4638/5121/6004/800/4133/22989/816/4135/4646/6711/57662/5999/56302/817/55930/2872/3783/634/8573/84033/4644/4430/128239/6331/139728/120/25827/4804/5997/119/93974/4642/107/3781/6016/5530/219537/8411/6262/815/814/55755/1265/23025/9657/23271/7442/55503/4650/4640/85366/6645/259266
BP	GO:0032946	positive regulation of mononuclear cell proliferation	100	0.429664	1.50266	0.0172662	0.0172662	0.0540653	1598	tags=15%	list=10%	signal=14%	1026/8744/100/1435/301/3280/10451/7535/3133/29126/58515/4179/3965/1947/3481
BP	GO:0031570	DNA integrity checkpoint	154	0.429459	1.58325	0.00136426	0.00136426	0.0144916	3318	tags=32%	list=20%	signal=26%	10769/1026/4193/2810/1647/55367/1820/7508/144455/7832/84444/1263/5934/79791/28984/25946/4194/581/81620/5347/51065/7153/57551/51343/472/84446/29997/51512/51499/26058/5111/1027/995/57060/440275/51149/83990/8091/8682/144715/80279/51514/83695/146956/3364/983/9575/1386/51322
BP	GO:0030534	adult behavior	128	0.429084	1.54406	0.00998573	0.00998573	0.0370874	1916	tags=22%	list=11%	signal=20%	2668/3398/51286/6623/1136/163175/22941/1813/23544/2059/9378/114798/6622/2043/2743/57578/26047/2055/4909/22876/18/5413/124925/26050/4097/1815/9369/58524
BP	GO:0009913	epidermal cell differentiation	175	0.428427	1.60759	0.00133333	0.00133333	0.0144916	1838	tags=20%	list=11%	signal=18%	55283/3872/25861/4488/2810/26154/301/9368/5493/3280/9314/23254/1969/28514/79152/144501/1514/58495/4851/10413/182/2355/387264/3516/3728/10628/440021/5017/79955/5453/3856/4926/5660/11078/4097
CC	GO:0042734	presynaptic membrane	145	0.427712	1.56838	0.00274348	0.00274348	0.0210391	2071	tags=23%	list=12%	signal=20%	53826/2823/3747/1813/1268/3737/776/112476/9378/6616/23208/2043/9892/134/8745/2900/6511/3738/6812/8573/1212/594855/1008/5138/6326/8061/134957/6529/322/1948/2903/115548/2901
BP	GO:1903708	positive regulation of hemopoiesis	156	0.427125	1.57607	0.00136799	0.00136799	0.0144916	1752	tags=19%	list=11%	signal=17%	3635/760/3398/4254/8744/54209/100/116151/2353/3725/1435/301/2621/3976/7535/51043/7071/25893/182/10221/2624/56998/5578/4179/3965/6774/7305/9398/5925
CC	GO:0044309	neuron spine	150	0.426999	1.57015	0.00275103	0.00275103	0.0210391	2319	tags=25%	list=14%	signal=22%	2823/4842/2185/22941/1813/5800/112476/4355/23208/2043/2890/134/23237/4131/9572/80315/23380/26052/88/9148/11346/124925/7074/4734/26037/322/3781/26232/2903/1410/5530/9546/8411/5728/815/1500/9743/22883
BP	GO:0030856	regulation of epithelial cell differentiation	124	0.426892	1.53386	0.0100143	0.0100143	0.0370874	2375	tags=23%	list=14%	signal=20%	2668/4488/2810/3280/3976/7132/81575/28514/7480/130497/1514/58495/4851/406/3975/634/10413/182/6662/1028/4926/3397/4097/5054/572/7122/5613/54806/1027
BP	GO:0007586	digestion	105	0.426474	1.50015	0.0185185	0.0185185	0.0567123	2192	tags=20%	list=13%	signal=17%	10874/7031/1056/9414/50848/6446/5020/7349/65266/3783/10891/6662/29887/57482/27347/5950/113235/29881/5222/336/389015
BP	GO:0045471	response to ethanol	103	0.42608	1.49176	0.0200861	0.0200861	0.0588678	2078	tags=23%	list=12%	signal=21%	1036/3747/2185/1813/1268/2059/57578/3371/3248/1938/2934/5999/94241/18/7298/929/4880/6774/5950/5997/1815/6678/2903/572
CC	GO:0014069	postsynaptic density	306	0.425963	1.69247	0.00123001	0.00123001	0.0144916	2319	tags=25%	list=14%	signal=22%	146395/4842/1136/8825/2185/22941/1813/5800/2905/59284/6457/80852/2059/2785/112476/4355/9231/114798/4897/4133/23208/2043/5064/2890/134/6711/84435/23136/26045/9863/23237/64084/5621/57537/4131/55450/23362/4744/9201/27445/7779/3836/8787/3708/80315/23380/26052/6854/88/9148/23229/120/11346/22849/6774/119/116841/8514/7074/10142/26115/4905/9123/152/26037/9478/4038/1948/107/2903/2901/1410/388135/664/815/1…
BP	GO:0072073	kidney epithelium development	125	0.425846	1.52997	0.0100143	0.0100143	0.0370874	1492	tags=19%	list=9%	signal=18%	2668/2247/6382/5228/342184/3579/5800/5915/3280/3976/2043/28514/9863/130497/65266/5979/4851/3975/10413/182/56998/6662/10736/3913
BP	GO:0002064	epithelial cell development	189	0.425756	1.61647	0.00131579	0.00131579	0.0144916	2201	tags=23%	list=13%	signal=20%	1026/6382/5144/25861/122786/2810/9414/9368/80781/5915/7132/50848/2022/579/3169/1969/28514/7852/9863/7431/83605/4851/406/10481/688/182/2355/6662/5138/57493/79955/57619/7298/3913/59/3397/51742/5660/11078/51092/572/631/389015/7122
BP	GO:0048771	tissue remodeling	137	0.425704	1.55315	0.00413793	0.00413793	0.0246024	1428	tags=18%	list=9%	signal=16%	5745/3635/760/1999/5166/4193/10461/2185/301/3988/3976/4853/1969/10512/84959/5880/634/182/5578/3516/581/10457/1471/29887
BP	GO:0007269	neurotransmitter secretion	155	0.425465	1.57074	0.0013624	0.0013624	0.0144916	1459	tags=19%	list=9%	signal=18%	6623/1136/8825/1813/1268/776/112476/9378/6622/6616/23208/9900/23396/63908/10814/8497/114088/3749/6812/8867/27445/7779/8573/127833/23621/594855/6854/51760/5413/6861
BP	GO:0099643	signal release from synapse	155	0.425465	1.57074	0.0013624	0.0013624	0.0144916	1459	tags=19%	list=9%	signal=18%	6623/1136/8825/1813/1268/776/112476/9378/6622/6616/23208/9900/23396/63908/10814/8497/114088/3749/6812/8867/27445/7779/8573/127833/23621/594855/6854/51760/5413/6861
BP	GO:0019933	cAMP-mediated signaling	135	0.425456	1.54866	0.00416667	0.00416667	0.0246024	2803	tags=31%	list=17%	signal=26%	5745/5144/4842/1813/57561/133/9368/9289/2696/108/54331/7349/2774/27445/8811/2770/5578/6662/23295/5138/333/5997/112609/576/152/11214/5744/55366/107/5739/5734/112/3627/8844/2782/2849/10672/23551/118442/135/2827/90226
CC	GO:0043197	dendritic spine	148	0.425204	1.56283	0.00273598	0.00273598	0.0210391	2319	tags=25%	list=14%	signal=22%	2823/4842/2185/22941/1813/5800/112476/4355/23208/2043/2890/134/23237/4131/9572/80315/23380/26052/88/9148/11346/124925/7074/4734/26037/322/3781/26232/2903/1410/5530/9546/5728/815/1500/9743/22883
CC	GO:0032279	asymmetric synapse	309	0.424968	1.6866	0.00123457	0.00123457	0.0144916	2319	tags=25%	list=14%	signal=22%	146395/4842/1136/8825/2185/22941/1813/5800/2905/59284/6457/80852/2059/2785/112476/4355/9231/114798/4897/4133/23208/2043/5064/2890/134/6711/84435/23136/26045/9863/23237/64084/5621/57537/4131/55450/23362/4744/9201/27445/7779/3836/8787/3708/80315/23380/26052/6854/88/9148/23229/120/11346/22849/6774/119/116841/8514/7074/10142/26115/4905/9123/152/26037/9478/4038/1948/107/2903/2901/1410/388135/664/815/1…
MF	GO:0001664	G protein-coupled receptor binding	200	0.424887	1.62505	0.00130378	0.00130378	0.0144916	3051	tags=32%	list=18%	signal=27%	10874/5144/6359/7483/57561/2781/133/6295/9368/25805/51308/1907/5064/134/6386/5020/9863/5621/7480/727/582/7349/624/2774/718/5173/2770/2779/26052/407/132112/65055/8321/333/6774/80326/112609/9630/5660/25927/152/4734/3716/3627/1636/10672/283869/4920/284654/2767/6347/7375/135/51816/7475/116985/90226/2534/89780/1742/6422/7275/6772/6362/7289
BP	GO:1902806	regulation of cell cycle G1/S phase transition	155	0.424122	1.56578	0.0013624	0.0013624	0.0144916	2375	tags=25%	list=14%	signal=22%	10769/1026/3398/4193/2810/1647/55367/301/2273/9314/1820/55294/144455/7832/1030/1263/123879/1032/5934/79791/28984/25946/56241/4194/581/10457/79027/5925/51065/79960/1029/138151/472/5728/51512/51499/26058/5111/1027
BP	GO:0006869	lipid transport	301	0.423349	1.67895	0.00123457	0.00123457	0.0144916	2954	tags=29%	list=18%	signal=24%	26031/24/347/3685/1056/1813/3931/26154/64137/4035/301/54677/10347/55754/9600/81575/114884/23461/134429/23762/51761/5020/8529/9619/8322/10349/10079/57476/126129/2055/7349/624/28965/4790/3783/634/5565/5360/388121/374868/121601/80765/57655/255738/5950/26119/29881/32/1374/10350/5660/1815/23460/9854/10599/153768/114876/302/4824/5321/336/5007/10499/5825/1636/51499/123/5322/58526/7069/79963/8660/5563/98…
BP	GO:0051302	regulation of cell division	148	0.422125	1.55151	0.00273598	0.00273598	0.0210391	2421	tags=23%	list=15%	signal=20%	10769/2247/5228/2810/1813/2103/28514/144455/56155/1263/56034/5934/9738/64762/7039/56241/84936/10628/11113/801/3481/9585/25909/5347/598/994/9055/4824/6840/5154/22933/29127/201163/585
BP	GO:0051588	regulation of neurotransmitter transport	121	0.421309	1.51	0.0142857	0.0142857	0.0475368	2489	tags=25%	list=15%	signal=21%	2668/4842/6623/1136/1813/1268/776/6622/23208/9900/63908/10814/5999/3749/6812/7779/8573/23621/594855/18/5413/5997/1815/6529/107/2901/815/5865/23025/9581
BP	GO:0010469	regulation of signaling receptor activity	136	0.421304	1.5332	0.00417827	0.00417827	0.0246024	3030	tags=29%	list=18%	signal=24%	124857/146395/5144/2185/22941/59284/64388/2890/134/8829/55294/23237/4747/4885/8787/10891/4062/653361/122809/7039/88/9148/255738/10142/25927/23467/152/5054/2903/5328/5728/54800/6347/306/27122/1742/117166/8202/3458/10368
BP	GO:0042770	signal transduction in response to DNA damage	126	0.420983	1.51539	0.0127119	0.0127119	0.0444213	2375	tags=23%	list=14%	signal=20%	10769/1026/4193/2810/1647/5366/55367/4646/8493/1820/340485/144455/7832/1263/200734/5934/28984/25946/4194/581/83667/5347/51065/51343/472/51512/51499/5111/1027
BP	GO:0035725	sodium ion transmembrane transport	119	0.419581	1.50077	0.0114778	0.0114778	0.0415412	2481	tags=24%	list=15%	signal=21%	6330/53826/4842/3775/284525/9368/5349/53822/6337/2745/53827/26504/130497/65266/817/7402/6331/123041/6326/255738/27347/1815/4734/10568/3799/389015/57657/6340/54800
CC	GO:0099699	integral component of synaptic membrane	130	0.419208	1.51322	0.0128388	0.0128388	0.0447246	975	tags=18%	list=6%	signal=18%	53826/2823/146395/1813/1268/5800/59284/3737/776/9378/114798/4897/23208/2043/2890/134/8829/26045/8745/64084/2900/6511/3738/7779
BP	GO:0016079	synaptic vesicle exocytosis	110	0.417532	1.47734	0.0186514	0.0186514	0.0567336	1459	tags=20%	list=9%	signal=18%	1813/1268/776/112476/6622/6616/23208/9900/23396/63908/10814/114088/6812/8867/27445/8573/127833/23621/594855/51760/5413/6861
BP	GO:0031109	microtubule polymerization or depolymerization	110	0.416824	1.47483	0.0186514	0.0186514	0.0567336	3818	tags=37%	list=23%	signal=29%	22924/4133/6622/24139/11076/57662/344148/4131/10297/81551/126731/347240/11004/3796/4926/54820/10142/51673/57551/25999/1453/10382/1410/89927/6249/348235/1027/55755/58526/23271/4281/8851/55835/1859/6188/10426/26586/7283/59341/23122/23116
BP	GO:0015718	monocarboxylic acid transport	132	0.416395	1.50982	0.0112676	0.0112676	0.0410471	3294	tags=33%	list=20%	signal=27%	1813/301/9368/54677/9900/6567/5020/8529/126129/624/28965/634/5565/9120/18/80765/32/1374/1815/9123/10599/6529/5321/151473/133418/10499/5825/1636/123/5322/58526/7069/8660/5563/147011/948/6850/320/1376/151176/81579/123264/9611/11001
BP	GO:0048167	regulation of synaptic plasticity	172	0.414232	1.55235	0.00133156	0.00133156	0.0144916	2264	tags=23%	list=14%	signal=20%	10769/2185/22941/1813/2905/112476/4355/6622/6616/816/2043/5270/2890/134/869/10814/26045/23237/5621/57537/4131/794/6812/27065/9148/11346/22849/84502/7305/116841/26037/8878/3745/107/10858/2903/84446/5728/815
BP	GO:0099003	vesicle-mediated transport in synapse	196	0.412612	1.5721	0.00131234	0.00131234	0.0144916	2527	tags=28%	list=15%	signal=24%	146395/1056/1813/1268/80852/6620/776/112476/9378/85439/6622/6616/23208/9892/9900/23396/63908/10814/9863/23237/114088/6812/8867/27445/1644/8573/27065/127833/23621/594855/26052/6854/51760/5337/5413/6861/50632/134957/116841/1815/1948/107/115548/2901/8943/273/84446/5728/815/5865/22883/23025/9581/27253/56850
MF	GO:0015085	calcium ion transmembrane transporter activity	127	0.41235	1.48612	0.0169731	0.0169731	0.0532974	1609	tags=19%	list=10%	signal=17%	2823/55283/3685/1268/492/489/2905/59284/776/2621/487/55799/93129/785/59285/56302/93589/80036/3708/5138/123041/778/84502/116444
BP	GO:0098657	import into cell	174	0.411739	1.54046	0.00134228	0.00134228	0.0144916	3050	tags=29%	list=18%	signal=24%	2668/3587/146395/4842/6507/54209/1813/6560/59284/284525/3761/6622/6616/54492/23237/5621/5999/2055/65266/56302/6511/64116/7779/26052/23479/50632/6512/9990/113235/5997/3768/1815/4036/6529/1948/1261/51305/389015/5865/9143/8660/7442/948/55503/2534/478/6520/3458/10368/4983
BP	GO:0043271	negative regulation of ion transport	118	0.411165	1.46776	0.0201729	0.0201729	0.0588678	1895	tags=23%	list=11%	signal=20%	3792/2669/4842/2185/1813/6236/1268/9368/6622/5270/134/8529/5999/130497/65266/817/7779/88/18/23479/2859/801/255738/27347/5997/1815/4734
BP	GO:1903522	regulation of blood circulation	251	0.411075	1.59641	0.00128041	0.00128041	0.0144916	1892	tags=20%	list=11%	signal=18%	6330/53826/10874/4193/5144/4842/3775/1813/100/492/489/59284/3761/133/776/487/55799/5349/1907/53822/134/5724/1839/121643/5020/785/5999/59285/7349/624/817/4634/30819/10659/143872/93589/3708/6271/7137/3728/6331/801/778/4880/5997/3768/9722/2643/10142/79041/152
CC	GO:0098984	neuron to neuron synapse	329	0.410377	1.63341	0.00121803	0.00121803	0.0144916	2319	tags=24%	list=14%	signal=21%	146395/4842/1136/8825/2185/22941/1813/5800/2905/59284/6457/80852/2059/2785/112476/4355/9231/114798/4897/4133/23208/2043/5064/2890/134/6711/84435/23136/26045/9863/23237/64084/5621/57537/4131/55450/2900/23362/4744/9201/27445/7779/3836/8787/3708/80315/23380/23621/26052/6854/88/9148/23229/120/11346/22849/6774/119/116841/8514/7074/10142/26115/4905/9123/152/26037/9478/4038/1948/107/2903/2901/1410/38813…
BP	GO:0051480	regulation of cytosolic calcium ion concentration	284	0.410263	1.61694	0.00124844	0.00124844	0.0144916	1739	tags=18%	list=10%	signal=17%	5745/1043/2247/10874/5144/55283/4842/3579/5145/3685/2185/1813/9001/1268/492/2905/4035/2785/133/776/1258/2830/6622/1907/5158/2890/134/2696/5020/7852/1649/1535/5621/624/56302/817/84959/794/10518/3708/8811/2624/4644/581/11346/2859/51554/801/84502/825/196541/79608
BP	GO:1901654	response to ketone	168	0.410255	1.53635	0.00132626	0.00132626	0.0144916	2494	tags=25%	list=15%	signal=21%	3490/1026/2908/6586/1373/2353/2308/57828/9314/5724/1946/3371/108/5020/54331/1535/1364/4747/15/10481/10413/1843/2770/10628/7298/8061/196541/598/5723/4824/107/572/23558/11057/5734/112/6663/10499/2782/5111/2706/5563
BP	GO:0035637	multicellular organismal signaling	174	0.409761	1.53306	0.00134228	0.00134228	0.0144916	1557	tags=17%	list=9%	signal=16%	6330/53826/5144/4842/3775/492/489/59284/3737/3761/776/4897/487/55799/5349/53822/26047/785/59285/817/30819/93589/3708/3728/6331/6326/2859/801/778/4880
BP	GO:0045766	positive regulation of angiogenesis	143	0.40942	1.49782	0.00831025	0.00831025	0.0333228	1292	tags=15%	list=8%	signal=14%	10769/2247/5228/3579/2185/133/301/9314/2022/8829/28514/7852/23576/51564/1512/6271/388/2624/718/4780/5578/3728
BP	GO:0010876	lipid localization	333	0.409332	1.632	0.00121212	0.00121212	0.0144916	2954	tags=28%	list=18%	signal=23%	26031/24/347/3685/1056/1813/3931/26154/64137/4035/301/4023/54677/10347/55754/9600/81575/114884/23461/134429/23762/55294/51761/5020/8529/9619/8322/10349/10079/57476/126129/2055/7349/624/28965/4790/3783/634/5565/5360/718/388121/374868/8204/121601/80765/57655/255738/5950/26119/29881/32/1374/10350/5660/1815/23460/9854/10599/153768/114876/302/4824/5321/336/5007/10499/5825/1636/51499/123/5322/58526/706…
BP	GO:0031099	regeneration	165	0.408566	1.52182	0.00539811	0.00539811	0.028119	2375	tags=25%	list=14%	signal=22%	55959/1026/5228/347/56963/3725/4035/133/301/2322/2621/59352/9314/2043/5738/3371/2934/4131/7480/7448/346007/4747/4851/10413/688/10076/22876/2027/83481/7298/3913/825/5792/4814/3651/336/5530/5728/6430/5111/1027
BP	GO:0035150	regulation of tube size	111	0.408475	1.44683	0.0201439	0.0201439	0.0588678	2300	tags=22%	list=14%	signal=19%	3792/4842/1373/80852/133/1907/134/5724/2730/7349/624/2053/143872/2729/4880/3778/5997/59/2643/152/219537/112/80005/1636
BP	GO:0035296	regulation of tube diameter	111	0.408475	1.44683	0.0201439	0.0201439	0.0588678	2300	tags=22%	list=14%	signal=19%	3792/4842/1373/80852/133/1907/134/5724/2730/7349/624/2053/143872/2729/4880/3778/5997/59/2643/152/219537/112/80005/1636
BP	GO:0097746	regulation of blood vessel diameter	111	0.408475	1.44683	0.0201439	0.0201439	0.0588678	2300	tags=22%	list=14%	signal=19%	3792/4842/1373/80852/133/1907/134/5724/2730/7349/624/2053/143872/2729/4880/3778/5997/59/2643/152/219537/112/80005/1636
BP	GO:0015698	inorganic anion transport	136	0.40839	1.4862	0.0097493	0.0097493	0.0365923	878	tags=12%	list=5%	signal=12%	26266/760/6507/1183/6560/55367/5349/2570/2743/9376/5724/6528/9498/84230/5621/65266/1364
BP	GO:0001764	neuron migration	146	0.408351	1.50055	0.00684932	0.00684932	0.0304214	2264	tags=27%	list=14%	signal=23%	2823/1813/2621/4897/9289/816/23654/4139/23768/8829/323/7852/4131/343472/30012/9201/79791/3975/2624/23380/54328/84197/581/6774/85508/9585/10806/3675/54820/89796/3084/221692/460/5108/80128/79625/653464/161582/815
MF	GO:0008017	microtubule binding	233	0.408314	1.57634	0.00130039	0.00130039	0.0144916	2721	tags=28%	list=16%	signal=24%	342184/23255/22924/83473/23139/4133/6622/4135/24139/3800/11076/57662/9832/374654/5621/4131/10297/1808/81631/126731/4744/3798/51361/26052/65055/11127/55638/84557/547/347240/11004/23499/3796/9702/9585/4926/5347/2009/7074/399693/54820/90990/51203/9055/25999/3799/115548/84056/1410/6249/25777/29127/348235/400954/6786/85459/55755/283431/7461/91978/54462/23271/9217/57787/4281
BP	GO:0071482	cellular response to light stimulus	117	0.407988	1.45844	0.0213371	0.0213371	0.0609879	1332	tags=16%	list=8%	signal=15%	1026/4193/5145/1643/5295/1258/6295/5158/90427/7508/6247/5429/5475/6794/5934/94241/2978/2779/581
BP	GO:0003018	vascular process in circulatory system	140	0.407621	1.49085	0.00828729	0.00828729	0.0333228	2300	tags=22%	list=14%	signal=19%	3792/4842/3579/1373/80852/133/1907/134/5724/2730/23576/7349/143282/624/566/634/2053/143872/56998/2729/5138/4880/3778/5997/59/2643/152/219537/112/80005/1636
BP	GO:0051592	response to calcium ion	129	0.407297	1.46549	0.0186782	0.0186782	0.0567336	2582	tags=27%	list=15%	signal=23%	140576/6382/2185/2353/3725/9536/23208/2696/817/30819/2978/15/1843/127833/10628/51760/6331/6861/121278/801/3778/825/4734/6678/6529/107/572/5530/6262/57586/6786/5563/1800/8437/4205
BP	GO:0006720	isoprenoid metabolic process	111	0.406847	1.44107	0.0215827	0.0215827	0.0609968	2362	tags=23%	list=14%	signal=19%	6382/9249/24/50700/4035/4023/9672/3339/220/54884/285440/224/5947/79947/151056/5950/2817/64577/4036/3158/336/53630/5264/10082/6385
BP	GO:0046683	response to organophosphorus	118	0.406734	1.45194	0.0216138	0.0216138	0.0609968	3245	tags=29%	list=19%	signal=23%	1036/6382/2185/1373/2353/3725/5724/7425/6528/5020/7480/10518/15/1843/5138/7298/8061/10142/6678/1261/5728/5322/22953/677/7442/682/5983/5026/4724/6772/1277/3784/2039/50506
BP	GO:0070371	ERK1 and ERK2 cascade	245	0.406468	1.57364	0.00128535	0.00128535	0.0144916	1368	tags=17%	list=8%	signal=16%	2247/1848/6359/54209/3685/2185/1813/389658/3725/4035/2192/467/2322/9368/10347/2621/3976/4853/9314/1969/2633/8829/55294/55450/56034/1846/10392/4851/1512/11117/634/1843/81848/388121/64762/5578/6662/3491/3965/128239/10457
MF	GO:0005262	calcium channel activity	111	0.406377	1.4394	0.0215827	0.0215827	0.0609968	1609	tags=19%	list=10%	signal=17%	2823/55283/3685/1268/2905/59284/776/2621/55799/93129/785/59285/56302/93589/80036/3708/5138/123041/778/84502/116444
BP	GO:0043534	blood vessel endothelial cell migration	106	0.405828	1.43063	0.0240453	0.0240453	0.0641936	1292	tags=14%	list=8%	signal=13%	10769/2247/2185/301/9314/1969/8829/55294/51564/4851/28984/2624/4780/5578/3728
BP	GO:0060047	heart contraction	243	0.405489	1.56711	0.00129032	0.00129032	0.0144916	1795	tags=20%	list=11%	signal=18%	6330/53826/10874/4193/5144/4842/3775/1813/100/492/489/59284/3761/133/776/487/55799/5349/1907/53822/134/1839/121643/5020/785/7852/5999/59285/7349/7134/817/4634/30819/10659/93589/3708/6271/7137/3728/6331/801/778/4880/5997/3768/9722/2643/4607/10142
BP	GO:0032412	regulation of ion transmembrane transporter activity	221	0.405306	1.55727	0.00261438	0.00261438	0.0208987	1588	tags=20%	list=10%	signal=19%	6330/53826/2669/146395/5144/4842/3747/54209/2185/22941/1813/6236/9001/59284/776/9368/487/5349/2273/53822/2890/5724/2745/79026/785/23237/53827/5621/130497/65266/817/4747/30819/8787/7402/6271/8811/10891/4644/88/2859/801/84502/255738/27347
CC	GO:0099240	intrinsic component of synaptic membrane	139	0.405269	1.47817	0.0124309	0.0124309	0.0440155	2071	tags=24%	list=12%	signal=22%	53826/2823/146395/1813/1268/5800/59284/3737/776/9378/114798/4897/23208/2043/2890/134/8829/26045/8745/64084/2900/6511/3738/7779/594855/1008/6326/9123/152/6529/1948/107/2903/2901
BP	GO:0001952	regulation of cell-matrix adhesion	104	0.40457	1.42059	0.0342368	0.0342368	0.0801786	2866	tags=30%	list=17%	signal=25%	342184/347/2185/5295/1435/4035/8829/1946/780/57662/340485/22998/8573/7402/182/3728/23499/79834/4814/5054/1029/1845/5328/55612/5728/6385/4323/948/8861/6422/5590
MF	GO:0017137	Rab GTPase binding	163	0.404505	1.50296	0.0067659	0.0067659	0.0304214	2325	tags=23%	list=14%	signal=20%	81846/84958/4645/54843/128344/9467/6764/27147/85377/10133/94120/414918/141/94121/4644/11127/374403/79778/6305/4804/134957/29881/23158/4905/90410/57553/9853/57589/5147/203228/302/22898/25782/92558/23312/23258/27342
BP	GO:0022898	regulation of transmembrane transporter activity	227	0.404488	1.55565	0.00130548	0.00130548	0.0144916	1588	tags=20%	list=10%	signal=19%	6330/53826/2669/146395/5144/4842/3747/54209/2185/22941/1813/6236/9001/59284/776/9368/487/6622/5349/2273/53822/2890/5724/2745/79026/785/23237/53827/5621/130497/65266/817/4747/30819/8787/7402/6271/8811/10891/4644/88/2859/801/84502/255738/27347
BP	GO:0070663	regulation of leukocyte proliferation	166	0.404128	1.50907	0.00536193	0.00536193	0.0280617	1368	tags=13%	list=8%	signal=12%	3635/1026/4254/8744/654346/100/1435/301/9231/3280/10451/7535/5621/51043/3133/5880/29126/58515/4179/3965/1947/10457
BP	GO:0001659	temperature homeostasis	153	0.404035	1.48946	0.00683995	0.00683995	0.0304214	1752	tags=20%	list=11%	signal=18%	43/10874/1813/1268/6778/57561/2308/4858/1907/134/5020/7852/1649/7480/9572/6794/56034/51043/4851/406/5565/10891/3516/5564/18/6774/55818/23228/3397/5925
BP	GO:0031214	biomineral tissue development	133	0.40399	1.46779	0.0167598	0.0167598	0.0532974	1995	tags=20%	list=12%	signal=17%	5745/4745/4488/2185/2308/286077/2621/144347/100533183/7480/26504/130497/7071/4851/6662/9622/3491/657/10457/29887/258/54084/4077/5744/55366/302
BP	GO:0110148	biomineralization	133	0.40399	1.46779	0.0167598	0.0167598	0.0532974	1995	tags=20%	list=12%	signal=17%	5745/4745/4488/2185/2308/286077/2621/144347/100533183/7480/26504/130497/7071/4851/6662/9622/3491/657/10457/29887/258/54084/4077/5744/55366/302
BP	GO:0021700	developmental maturation	249	0.40366	1.56428	0.001287	0.001287	0.0144916	2254	tags=22%	list=14%	signal=19%	5745/1026/3398/51286/163175/4488/2185/116151/23544/9378/3280/4897/816/59277/5064/3169/26047/144347/1649/100533183/4131/7480/5979/4747/6812/30819/54738/10481/25893/5364/2624/718/4644/3516/5414/64100/9148/1028/55638/7298/124925/4880/8434/5925/399979/9985/994/8943/11057/631/22933/6663/347688/55612/5728
CC	GO:0034703	cation channel complex	199	0.403307	1.53855	0.00262467	0.00262467	0.0208987	1795	tags=21%	list=11%	signal=19%	6330/5144/4842/3747/3775/2185/2905/59284/3737/2059/3761/776/1258/487/55799/6616/57828/2890/26047/6337/55013/785/2900/126129/59285/3749/3738/30819/3783/93589/285175/6331/6326/801/778/116444/170850/3778/9722/8514/10142
BP	GO:0000075	cell cycle checkpoint	211	0.40298	1.54998	0.00259403	0.00259403	0.0208987	3442	tags=31%	list=21%	signal=25%	10769/1026/4193/2810/1647/7483/55367/1820/7508/144455/7832/56155/1030/84444/1263/5934/79791/28984/1843/25946/84936/4194/581/81620/5347/5925/598/51065/7153/57551/51343/472/84446/29997/51512/51499/26058/5111/1027/55755/84861/1063/10459/995/57060/440275/51149/83990/8091/8682/144715/80279/51514/83695/146956/348654/3364/11130/983/54908/9575/1386/51322/51451/23019/7465
MF	GO:0022843	voltage-gated cation channel activity	127	0.402893	1.45204	0.0183876	0.0183876	0.0564663	2056	tags=23%	list=12%	signal=20%	3747/3685/3775/2185/1268/2905/59284/3737/3761/131096/776/2621/55799/6616/785/59285/3749/3738/30819/93589/778/170850/3778/3768/8514/343450/302/3745/2903
CC	GO:0005814	centriole	124	0.402891	1.44762	0.0214592	0.0214592	0.0609968	3257	tags=32%	list=20%	signal=26%	10769/80705/9001/126731/822/22897/26005/9738/3310/153241/11127/347240/9814/3796/10806/5347/22873/6491/90410/7153/5108/22995/22933/4957/54806/85459/84871/80709/585/9657/95681/85302/10039/284403/9696/9859/57489/55835/3064/80212
BP	GO:0006874	cellular calcium ion homeostasis	370	0.402864	1.62121	0.00118906	0.00118906	0.0144916	1676	tags=17%	list=10%	signal=16%	5745/3792/8614/1043/2247/10874/5144/55283/4842/6359/3579/5145/3685/2185/1813/9001/1268/492/489/2905/4035/2785/133/776/1258/2830/487/6622/1907/5158/9900/2890/134/2696/55013/5020/7852/1649/1535/5621/624/56302/817/84959/794/10518/7779/2053/3708/8811/2624/58515/4644/7137/581/123041/11346/2859/51554/801/84502/825/196541
BP	GO:0006898	receptor-mediated endocytosis	216	0.402859	1.55101	0.00258398	0.00258398	0.0208987	3088	tags=32%	list=19%	signal=26%	43/146395/3579/1813/59284/6457/4035/1174/133/6295/6622/6616/3339/23208/9892/2890/23396/6386/28514/26045/85377/9863/23237/7448/634/1212/22876/718/9094/26052/407/567/22848/81035/929/50632/255738/26119/1815/7036/4734/4036/6678/5054/1948/302/3643/115548/5298/2209/54806/27342/432/160/284654/948/1601/3684/89780/1742/88455/3263/6850/1191/6456/375/10368/4983/3240
BP	GO:0003015	heart process	250	0.402746	1.5625	0.00128535	0.00128535	0.0144916	1923	tags=21%	list=12%	signal=19%	6330/53826/10874/4193/5144/4842/3775/1813/100/492/489/59284/3761/133/776/487/55799/5349/1907/53822/134/1839/121643/5020/785/7852/5999/59285/7349/7134/817/4634/30819/10659/10413/93589/3708/6271/7137/3728/6331/801/778/4880/5997/3768/9722/2643/4607/10142/79041/11214
BP	GO:0042552	myelination	121	0.402682	1.44324	0.0214286	0.0214286	0.0609968	2254	tags=19%	list=14%	signal=17%	3792/81846/5803/3400/163175/9639/5915/23136/7852/26022/79152/4644/5453/6326/2817/4665/5660/9514/3084/118738/22933/6663/5728
BP	GO:0007600	sensory perception	493	0.402453	1.65661	0.00115473	0.00115473	0.0144916	2716	tags=24%	list=16%	signal=21%	10002/3983/27241/10874/9249/83715/6507/4901/24/25861/5149/5145/6094/5957/1813/1268/3737/50700/6004/776/1258/9368/140469/80781/51308/2570/1428/5158/2743/4646/5270/134/24139/5724/124590/6337/6247/84839/51761/5020/80055/7852/285440/5475/8322/7480/26504/582/2055/4919/6096/7349/346007/1032/2774/4649/2978/93589/80036/768206/8787/9094/2779/4644/23621/594855/7546/407/128338/132112/84197/5132/79955/123041…
BP	GO:0001822	kidney development	249	0.402366	1.55926	0.001287	0.001287	0.0144916	2362	tags=22%	list=14%	signal=19%	2668/760/55959/2247/3398/6382/5228/342184/3579/4811/5800/3399/50484/9231/5915/3280/3976/2043/8829/3248/28514/9863/130497/65266/5979/4851/1512/3975/10413/182/56998/317/7161/6662/1028/581/10736/5017/3913/255738/59/3675/90410/4038/1948/55366/4824/5154/26249/5613/1636/54806/201163/6385
BP	GO:0030216	keratinocyte differentiation	129	0.401651	1.44517	0.0201149	0.0201149	0.0588678	1813	tags=19%	list=11%	signal=17%	3872/4488/2810/26154/301/5493/23254/1969/144501/1514/58495/4851/10413/182/2355/387264/3516/3728/10628/440021/5453/3856/4926/5660
BP	GO:0006836	neurotransmitter transport	237	0.401625	1.55217	0.00129032	0.00129032	0.0144916	1700	tags=20%	list=10%	signal=18%	2668/4842/6507/6623/1136/8825/1813/100/1268/776/112476/9378/6622/6616/23208/388662/9900/23396/63908/10814/8497/114088/5999/2055/3749/6511/3382/9899/6812/8867/27445/1644/7779/8573/127833/23621/594855/11230/6854/51760/22987/18/5413/6861/6512/5997/116841
CC	GO:0097060	synaptic membrane	383	0.401184	1.62166	0.00118906	0.00118906	0.0144916	2072	tags=23%	list=12%	signal=21%	53826/2823/146395/3747/1136/8825/22941/1813/1268/5800/2905/59284/3737/1363/80852/286/3761/776/301/112476/9378/4355/9231/114798/4897/6616/23208/2570/2043/5064/9892/2743/2890/134/8829/869/23345/26045/8745/23237/64084/55450/2900/23362/794/6511/3738/6812/8867/7779/9568/8573/8787/7402/1212/27065/80315/23380/594855/1008/26052/88/9148/5138/23229/6326/11346/22849/8061/116444/134957/3778/3675/7074/10142/9…
CC	GO:0070160	tight junction	119	0.400958	1.43416	0.0243902	0.0243902	0.0643682	2217	tags=25%	list=13%	signal=22%	8825/27134/9414/24146/143162/50848/51421/1969/57125/84952/9863/84552/4810/65266/1364/8531/83481/11346/79778/51599/9618/154810/9266/5912/9080/4867/54532/54566/7122/55870
CC	GO:0099572	postsynaptic specialization	324	0.40062	1.59733	0.00120482	0.00120482	0.0144916	2319	tags=24%	list=14%	signal=21%	146395/4842/1136/8825/2185/22941/1813/5800/2905/59284/6457/80852/2059/2785/112476/4355/9231/114798/4897/4133/23208/2043/5064/2890/134/6711/84435/23136/26045/9863/23237/64084/5621/57537/4131/55450/23362/4744/9201/27445/7779/3836/8787/3708/80315/23380/1008/26052/6854/88/9148/23229/120/11346/22849/6774/119/116841/8514/7074/10142/26115/4905/9123/152/26037/9478/4038/1948/107/2903/2901/1410/388135/664/…
BP	GO:0003206	cardiac chamber morphogenesis	118	0.40055	1.42987	0.0230548	0.0230548	0.0634568	1909	tags=25%	list=11%	signal=22%	3398/4193/9249/4488/2294/6586/1363/5915/3280/4853/2022/8829/10512/7134/4634/58495/4851/182/3516/7137/3491/57493/9421/657/8321/5950/4607/3084/4036
BP	GO:0032409	regulation of transporter activity	239	0.400505	1.54877	0.00129366	0.00129366	0.0144916	1588	tags=20%	list=10%	signal=18%	6330/53826/2669/146395/5144/4842/3747/54209/2185/22941/1813/6236/9001/59284/776/9368/487/6622/5349/2273/53822/2890/6446/5724/2745/79026/785/23237/53827/5621/130497/65266/817/4747/30819/8787/7402/6271/8811/10891/4644/88/2859/801/84502/255738/27347
BP	GO:0007204	positive regulation of cytosolic calcium ion concentration	255	0.400216	1.55671	0.00127877	0.00127877	0.0144916	1739	tags=18%	list=10%	signal=16%	5745/1043/2247/10874/5144/55283/4842/3579/3685/2185/1813/9001/1268/2905/4035/2785/133/776/2830/6622/1907/2696/5020/7852/1649/1535/5621/624/56302/817/84959/10518/3708/8811/2624/4644/581/11346/2859/51554/801/84502/825/196541/79608
BP	GO:0070374	positive regulation of ERK1 and ERK2 cascade	156	0.399889	1.47557	0.00683995	0.00683995	0.0304214	1368	tags=14%	list=8%	signal=13%	2247/6359/54209/2185/1813/389658/3725/4035/2322/10347/2621/4853/8829/55294/56034/10392/4851/388121/64762/5578/3965/10457
BP	GO:0001655	urogenital system development	296	0.399797	1.58413	0.00123609	0.00123609	0.0144916	2375	tags=23%	list=14%	signal=20%	2668/760/55959/2247/3398/6382/5228/342184/3579/3400/4811/2294/5800/3399/50484/301/9231/5915/3280/3976/2043/3169/8829/3371/3248/28514/9863/6794/130497/65266/5979/4851/1512/3975/10481/10413/182/2624/56998/317/7161/6662/55840/1028/581/10736/5017/2049/3913/255738/5950/59/3675/5660/90410/4038/1948/55366/4824/5154/26249/5728/5613/1636/54806/201163/6385/1027
MF	GO:1901681	sulfur compound binding	207	0.399642	1.53377	0.00260417	0.00260417	0.0208987	1728	tags=18%	list=10%	signal=16%	51363/4745/2247/10468/6359/5228/1056/4753/6586/64388/4035/79690/6402/4023/9289/9536/59352/5270/8829/1839/307/7448/1289/143282/414149/566/875/64100/3491/462/59271/10457/7058/333/50509/5792/32
BP	GO:0050900	leukocyte migration	330	0.399538	1.59176	0.00121212	0.00121212	0.0144916	3065	tags=25%	list=18%	signal=21%	3635/6382/5144/4254/6359/5228/3579/10461/347/54209/3685/2185/100/5295/5800/1435/2059/301/6402/2621/9672/10451/8795/50848/1907/134/5724/23396/7535/7852/727/5979/566/5880/11117/634/6793/1843/58515/8174/3965/965/3603/23428/27347/2817/119/3675/57126/9057/7499/9123/8729/5054/140885/51157/7409/5734/3627/83692/27342/6385/4920/6223/4323/79647/682/7857/6347/3684/5627/4478/1130/2534/6850/5155/51378/3678/61…
CC	GO:0036064	ciliary basal body	126	0.399255	1.43717	0.0211864	0.0211864	0.0607129	3930	tags=37%	list=24%	signal=28%	25861/167691/128344/9231/124590/374654/126731/582/26005/284076/22994/51626/28981/2121/55212/10806/55812/22873/90410/79960/5108/150737/54806/84871/585/353116/1063/95681/85302/57787/27152/261734/23329/57489/55835/11092/80210/51098/55717/4291/7283/49856/23116/55764/22920/2909
BP	GO:0071695	anatomical structure maturation	199	0.39912	1.52258	0.00262467	0.00262467	0.0208987	2214	tags=21%	list=13%	signal=19%	5745/1026/3398/51286/163175/4488/2185/116151/3280/4897/59277/3169/26047/144347/1649/100533183/7480/5979/30819/54738/10481/25893/5364/2624/718/4644/3516/5414/64100/1028/7298/4880/8434/5925/9985/994/11057/631/22933/6663/347688/55612
BP	GO:0002685	regulation of leukocyte migration	151	0.398914	1.46762	0.0109739	0.0109739	0.0401084	1279	tags=14%	list=8%	signal=13%	4254/5228/3579/347/54209/2185/100/1435/301/2621/1907/134/5724/727/5880/11117/6793/1843/58515/8174/3965
BP	GO:0007188	adenylate cyclase-modulating G protein-coupled receptor signaling pathway	161	0.398866	1.47929	0.00816327	0.00816327	0.0330905	2376	tags=26%	list=14%	signal=23%	5745/5144/4842/1813/1268/57561/2781/133/776/9368/9289/5064/134/108/54331/2774/8811/2770/2779/5578/5138/333/5997/112609/9630/576/5660/1815/152/11214/5744/55366/107/5739/5734/4886/112/3627/2782/2849/10672/10163
BP	GO:0003279	cardiac septum development	107	0.39836	1.40198	0.0314286	0.0314286	0.0759969	1450	tags=21%	list=9%	signal=20%	3398/4193/9249/4488/6586/5915/3280/4853/2022/4052/8829/10512/4851/182/57167/3516/3491/4194/5138/57493/9421/657/8321
MF	GO:0019955	cytokine binding	105	0.3982	1.40069	0.034188	0.034188	0.0801786	821	tags=14%	list=5%	signal=14%	124857/3587/3579/3685/64388/7132/2022/58985/4052/2633/8829/3977/7852/8322/7837
BP	GO:0070372	regulation of ERK1 and ERK2 cascade	230	0.397828	1.53405	0.00259403	0.00259403	0.0208987	1368	tags=16%	list=8%	signal=15%	2247/1848/6359/54209/2185/1813/389658/3725/4035/2192/467/2322/9368/10347/2621/3976/4853/9314/1969/2633/8829/55294/55450/56034/1846/10392/4851/11117/634/1843/81848/388121/64762/5578/3491/3965/10457
CC	GO:0031253	cell projection membrane	291	0.397773	1.57498	0.00123001	0.00123001	0.0144916	2267	tags=24%	list=14%	signal=21%	5745/84958/27241/9249/3747/5149/3685/3775/22941/6094/1813/3737/2059/286/1258/4355/9368/10347/5064/4646/1969/2890/134/6711/26047/23396/6337/23136/10297/582/55243/23362/730094/192668/3749/634/8573/768206/7402/81848/221178/1212/2779/50649/151056/374403/200958/23499/54084/64787/113235/9847/2121/29881/55212/3675/7074/4642/1464/1836/4036/3643/10568/3745/92211/23288/55612/8844/2782
CC	GO:0043025	neuronal cell body	461	0.397763	1.63373	0.00115741	0.00115741	0.0144916	2072	tags=21%	list=12%	signal=19%	9638/2823/3747/6507/25861/347/6623/1136/3775/2185/22941/1813/100/23544/59284/3737/1363/4035/113451/85442/9378/4133/6622/114757/2043/9900/2890/134/8829/26047/3800/10814/9498/57125/23237/1535/4131/1263/55450/22902/26504/214/7349/3749/5979/3798/79791/1644/3783/4885/84630/25946/10891/22876/5126/653361/5173/2779/4644/23621/9148/657/11113/6240/6861/11346/547/8633/124925/778/1917/2026/116444/116841/4926…
MF	GO:0005085	guanyl-nucleotide exchange factor activity	203	0.397359	1.52407	0.0025974	0.0025974	0.0208987	2378	tags=26%	list=14%	signal=23%	81846/50650/1795/9844/9467/2059/85442/9639/23179/10044/10451/7410/6764/27147/126432/23362/23101/414918/55701/221178/89846/25791/84033/50649/50618/23229/255426/26230/55160/6305/57480/9266/64787/1933/1102/7074/8874/23370/11214/8729/57589/203228/5739/139818/22898/7409/25782/80005/8925/23258/27342/201163/440073
BP	GO:0032944	regulation of mononuclear cell proliferation	158	0.397296	1.47125	0.00680272	0.00680272	0.0304214	1669	tags=15%	list=10%	signal=13%	3635/1026/8744/654346/100/1435/301/9231/3280/10451/7535/5621/51043/3133/5880/29126/58515/4179/3965/1947/10457/3481/7305
BP	GO:0055074	calcium ion homeostasis	380	0.397206	1.60464	0.00118624	0.00118624	0.0144916	1574	tags=17%	list=9%	signal=15%	5745/3792/8614/1043/2247/10874/5144/55283/4842/6359/3579/5145/3685/2185/1813/9001/1268/492/489/2905/4035/2785/133/776/1258/2830/487/6622/1907/5158/9900/2890/134/2696/55013/5020/7852/1649/1535/5621/624/56302/817/84959/794/10518/7779/8805/2053/3708/8811/2624/58515/4644/7137/581/123041/29887/11346/2859/51554/801/84502
BP	GO:0002573	myeloid leukocyte differentiation	173	0.396543	1.48466	0.00267023	0.00267023	0.0210391	1752	tags=16%	list=11%	signal=15%	3635/760/3398/4254/54209/10202/5295/2353/3725/1435/3976/4853/1969/55294/9644/84959/7071/634/10221/2624/56998/5578/3516/29887/7305/9398/171392/5925
BP	GO:0072001	renal system development	261	0.396511	1.54785	0.00126743	0.00126743	0.0144916	2362	tags=21%	list=14%	signal=19%	2668/760/55959/2247/3398/6382/5228/342184/3579/4811/2294/5800/3399/50484/9231/5915/3280/3976/2043/8829/3248/28514/9863/130497/65266/5979/4851/1512/3975/10413/182/56998/317/7161/6662/1028/581/10736/5017/3913/255738/5950/59/3675/90410/4038/1948/55366/4824/5154/26249/5613/1636/54806/201163/6385
BP	GO:0060078	regulation of postsynaptic membrane potential	116	0.39632	1.41205	0.0244253	0.0244253	0.0643682	2880	tags=28%	list=17%	signal=23%	1136/2185/22941/1813/2905/9378/4355/6622/2570/2743/2890/134/869/2900/5999/18/124925/1815/56853/2903/2901/5530/388135/5728/22953/1135/2558/7442/135/1742/5590/5026
BP	GO:1904018	positive regulation of vasculature development	159	0.395836	1.4654	0.00685871	0.00685871	0.0304214	1292	tags=15%	list=8%	signal=14%	10769/2247/5228/3579/2185/133/301/9314/2022/8829/28514/7852/23576/51564/4851/1512/634/6271/388/2624/718/4780/5578/3728
BP	GO:0002687	positive regulation of leukocyte migration	101	0.395642	1.38775	0.0445402	0.0445402	0.0938575	2232	tags=19%	list=13%	signal=16%	4254/5228/3579/54209/2185/1435/2621/1907/5724/5880/58515/8174/3965/27347/7499/5054/51157/3627/83692
BP	GO:0000302	response to reactive oxygen species	195	0.394701	1.50383	0.0039267	0.0039267	0.0241139	2368	tags=21%	list=14%	signal=18%	6382/4193/3747/347/2185/100/6778/2353/3725/2308/301/27244/143686/9314/1938/4151/1263/7352/1843/388/10891/55270/653361/4780/10628/10516/84557/8061/83667/2643/5660/5601/140885/51157/1410/572/664/4217/5829/824/5111
BP	GO:0007272	ensheathment of neurons	123	0.393501	1.41127	0.0230216	0.0230216	0.0634568	2254	tags=19%	list=14%	signal=16%	3792/81846/5803/3400/163175/9639/5915/23136/7852/26022/79152/4644/5453/6326/2817/4665/5660/9514/3084/118738/22933/6663/5728
BP	GO:0008366	axon ensheathment	123	0.393501	1.41127	0.0230216	0.0230216	0.0634568	2254	tags=19%	list=14%	signal=16%	3792/81846/5803/3400/163175/9639/5915/23136/7852/26022/79152/4644/5453/6326/2817/4665/5660/9514/3084/118738/22933/6663/5728
BP	GO:0006814	sodium ion transport	183	0.393442	1.48515	0.00530504	0.00530504	0.0278949	2192	tags=20%	list=13%	signal=17%	6330/26266/53826/4842/3775/1813/284525/9368/9058/5349/53822/5270/6446/6528/6337/2745/9498/53827/26504/130497/65266/817/7402/6526/6331/123041/6326/255738/27347/54407/1815/4734/10568/3799/26249/389015
BP	GO:0099504	synaptic vesicle cycle	177	0.391832	1.47212	0.00796813	0.00796813	0.0326992	3190	tags=33%	list=19%	signal=27%	1056/1813/1268/6620/776/112476/9378/85439/6622/6616/23208/9892/9900/23396/63908/10814/9863/114088/6812/8867/27445/1644/8573/127833/23621/594855/26052/6854/51760/5337/5413/6861/134957/116841/107/115548/2901/8943/273/84446/5728/815/5865/23025/9581/27253/56850/135/89780/320/6456/8448/6853/4983/8851/5579/23513/1759
BP	GO:0042542	response to hydrogen peroxide	125	0.391664	1.40716	0.0243205	0.0243205	0.0643682	3319	tags=30%	list=20%	signal=24%	6382/4193/2185/100/6778/3725/2308/301/9314/1938/4151/1843/388/4780/10628/84557/8061/5660/140885/51157/1410/572/664/4217/824/5111/558/1728/2534/6772/2876/10494/1277/3240/983/59338/5074
CC	GO:0098978	glutamatergic synapse	317	0.391479	1.56182	0.00120627	0.00120627	0.0144916	3195	tags=31%	list=19%	signal=25%	53826/2823/146395/2185/1813/58504/1268/492/5800/2905/59284/6457/80852/2059/9378/114798/4897/57460/6616/388662/2043/9900/2890/8829/6711/869/84435/10814/26045/8745/23237/64084/8322/126129/6511/3738/6812/3836/4885/8787/27065/4644/1008/26052/6854/88/6326/11346/50632/87/3556/6774/116841/9722/7074/10142/26115/1815/23467/3084/152/6678/1948/107/2903/2901/8943/5530/814/1500/5573/22883/10082/25897/23025/27…
BP	GO:0050731	positive regulation of peptidyl-tyrosine phosphorylation	160	0.391034	1.44791	0.00820793	0.00820793	0.033151	3073	tags=28%	list=18%	signal=23%	4254/54209/2185/1795/389658/2322/2621/3280/3976/7132/2043/134/8829/1839/1946/55294/5621/7448/9094/653361/7039/9148/6774/3481/1464/3084/4038/2209/54625/1636/5168/948/80725/2534/89780/1742/3263/6850/5155/9244/51378/3678/3458/2261
BP	GO:0000082	G1/S transition of mitotic cell cycle	233	0.390862	1.50896	0.00390117	0.00390117	0.0241139	2375	tags=20%	list=14%	signal=18%	10769/1026/3398/4193/3400/2810/1647/58480/55367/301/8900/2103/2273/9314/1820/144455/7832/1030/1263/123879/1032/5934/79791/28984/25946/4194/581/128239/10457/7298/81620/79027/5925/51065/79960/1018/1029/138151/472/5530/5728/815/51512/51499/26058/5111/1027
CC	GO:0005884	actin filament	104	0.390509	1.37122	0.0485021	0.0485021	0.0997548	2334	tags=23%	list=14%	signal=20%	83715/342184/25861/8522/27295/301/4646/9050/10297/5880/4644/88/4430/342527/87/23242/644150/51332/11214/9124/58/219537/92521/23022
BP	GO:0035264	multicellular organism growth	130	0.390328	1.40898	0.0228245	0.0228245	0.0632919	2648	tags=21%	list=16%	signal=18%	9518/8614/5144/1813/1435/114798/5915/57578/104/51761/2593/83605/29123/1028/57493/4880/6774/3481/6491/7516/472/4886/26058/585/677/2307/114789
BP	GO:0006813	potassium ion transport	197	0.389945	1.48649	0.00524246	0.00524246	0.0278284	2382	tags=25%	list=14%	signal=22%	3792/4842/3747/6507/54209/3775/2185/1813/6560/3737/284525/3761/131096/776/5349/6616/2273/134/5621/5999/65266/3749/3738/30819/3783/8811/84286/88/123041/27347/9990/170850/3778/3768/9722/8514/343450/10142/4905/3249/79041/4734/3799/3745/3781/51305/389015/5728/1027/57657
BP	GO:0007626	locomotory behavior	178	0.389929	1.46529	0.00797872	0.00797872	0.0326992	1947	tags=18%	list=12%	signal=16%	2668/3398/51286/55283/83715/6623/1136/163175/1813/23544/57561/2059/6622/6616/2043/2743/257194/220/8322/2055/4909/25946/22876/4644/18/124925/2119/5660/1815/3084/58524/460
BP	GO:0072503	cellular divalent inorganic cation homeostasis	391	0.389792	1.57701	0.00118765	0.00118765	0.0144916	1574	tags=16%	list=9%	signal=15%	5745/3792/8614/1043/2247/10874/5144/55283/4842/6359/3579/5145/3685/2185/1813/9001/1268/492/489/2905/4035/2785/133/776/1258/2830/487/6622/1907/5158/9900/2890/134/2696/55013/5020/7852/1649/1535/5621/624/56302/817/84959/794/64116/10518/7779/2053/3708/8811/2624/58515/4644/7137/581/123041/11346/2859/51554/801/84502
MF	GO:0015631	tubulin binding	319	0.389574	1.55414	0.00120482	0.00120482	0.0144916	2479	tags=24%	list=15%	signal=21%	9638/342184/23255/128344/22924/83473/23139/4133/6622/23208/4135/24139/3800/11076/57662/9832/374654/5621/4131/10297/1808/81631/81551/126731/4744/3798/284076/282991/10891/51361/26052/65055/11127/55638/84557/547/8633/347240/11004/23499/3796/28981/9702/5997/9585/4926/5347/2009/7074/399693/54820/51673/90990/51203/57551/23287/8733/9055/25999/3799/115548/84056/1410/6249/84446/25777/29127/348235/400954/6…
BP	GO:0048469	cell maturation	149	0.388954	1.43004	0.0177839	0.0177839	0.054915	2191	tags=21%	list=13%	signal=18%	5745/1026/3398/163175/2185/116151/3280/4897/59277/3169/26047/5979/30819/54738/10481/25893/2624/718/5414/64100/1028/7298/4880/5925/9985/994/11057/631/22933/6663/347688
MF	GO:0015399	primary active transmembrane transporter activity	108	0.38883	1.37309	0.042796	0.042796	0.0923219	3281	tags=28%	list=20%	signal=22%	24/492/489/6890/26154/64137/10347/487/23461/534/9619/10349/6891/535/155066/523/10350/23460/5825/10058/79963/540/23457/478/21/368/19/526/10928/10057
BP	GO:0042445	hormone metabolic process	184	0.388558	1.46528	0.00797872	0.00797872	0.0326992	3378	tags=27%	list=20%	signal=21%	8614/3293/43/9249/10202/2232/50700/1363/133/1428/3169/27344/6528/220/54884/27284/4790/15/5947/10891/5126/151056/25825/438/5950/3249/64577/51171/10858/10159/9159/53630/1636/9256/1066/54760/2784/441282/27122/3458/1551/8630/51170/7421/50506/59338/1593/64377/51301
CC	GO:0070382	exocytic vesicle	191	0.388371	1.47117	0.00529801	0.00529801	0.0278949	3046	tags=32%	list=18%	signal=27%	84958/54843/1813/9001/112476/85439/6622/6616/23208/388662/9892/9900/2890/30061/114088/94120/4909/3382/9899/1644/1212/55530/94121/8675/127833/23621/594855/5414/6854/51760/85409/22987/5413/6861/547/134957/116841/598/5873/2903/51305/6449/273/23312/84446/5865/57586/9143/11311/23025/23546/23673/192683/23176/1742/10228/320/6456/8448/255057/6853/5867
BP	GO:0099173	postsynapse organization	144	0.388363	1.42181	0.023416	0.023416	0.0639771	2002	tags=21%	list=12%	signal=18%	2668/22941/1056/58504/9378/4897/816/2043/2743/8829/869/26045/9863/23237/5621/4744/4747/65981/25791/26052/2049/87/3556/2119/9722/3675/7074/26037/4038/3643
MF	GO:0005244	voltage-gated ion channel activity	171	0.388117	1.45483	0.00930851	0.00930851	0.0352944	1758	tags=18%	list=11%	signal=16%	6330/3747/3685/3775/2185/1183/1268/2905/59284/3737/3761/131096/776/2621/55799/6616/785/59285/3749/3738/30819/93589/6331/6326/778/170850/3778/3768/8514/343450
MF	GO:0022832	voltage-gated channel activity	171	0.388117	1.45483	0.00930851	0.00930851	0.0352944	1758	tags=18%	list=11%	signal=16%	6330/3747/3685/3775/2185/1183/1268/2905/59284/3737/3761/131096/776/2621/55799/6616/785/59285/3749/3738/30819/93589/6331/6326/778/170850/3778/3768/8514/343450
BP	GO:0045834	positive regulation of lipid metabolic process	117	0.388086	1.3873	0.0341394	0.0341394	0.0801786	1740	tags=17%	list=10%	signal=15%	2247/2185/10580/133/301/2322/221395/7132/10451/7410/134/134429/9619/9572/10891/388121/3491/1917/26119/1374
BP	GO:0035023	regulation of Rho protein signal transduction	126	0.388036	1.39679	0.0240113	0.0240113	0.0641936	3474	tags=35%	list=21%	signal=28%	50650/2059/9639/9289/10451/7410/8829/23101/143872/55701/221178/89846/25791/84033/50649/57493/50618/23229/26230/55160/2859/57480/64787/3675/7074/157285/8874/23370/11214/7409/253980/201163/64283/27/4650/613/4983/9855/19/5924/7126/9459/9750/57449
BP	GO:0010822	positive regulation of mitochondrion organization	111	0.387519	1.3726	0.0388489	0.0388489	0.0866892	1475	tags=14%	list=9%	signal=12%	638/54209/2810/58480/5366/90427/55294/10133/54832/5880/27113/10891/7161/581/79778
BP	GO:0071236	cellular response to antibiotic	126	0.387484	1.3948	0.0240113	0.0240113	0.0641936	4197	tags=35%	list=25%	signal=26%	4193/6778/3399/2308/301/9314/1946/108/94241/388/2770/4780/84557/5660/107/5321/140885/51157/112/5728/664/4217/5111/1027/6688/558/1728/5155/1191/10494/983/59338/5074/6188/2309/120892/7226/65018/55139/1894/10276/9349/8678/358
CC	GO:0019897	extrinsic component of plasma membrane	151	0.387359	1.42511	0.0164609	0.0164609	0.0530335	2347	tags=24%	list=14%	signal=21%	84958/54843/2185/4240/2785/2781/301/6616/6277/9892/5270/6247/2786/54331/10297/94120/2774/2770/2779/1008/3728/22848/57655/255738/134957/9630/4926/8514/7074/10142/302/8411/2782/29127/1500/10672
BP	GO:0007187	G protein-coupled receptor signaling pathway	coupled to cyclic nucleotide second messenger	178	0.387325	1.45551	0.00930851	0.00930851	0.0352944	2803	tags=28%	list=17%	signal=23%	5745/5144/4842/1813/1268/57561/2781/133/776/301/9368/9289/5064/134/108/54331/2774/8811/2770/2779/5578/5138/333/5997/112609/9630/576/5660/1815/152/11214/5744/55366/107/5739/5734/4886/112/3627/2782/2849/10672/10163/2847/2767/6347/135/2827/90226
CC	GO:0005923	bicellular tight junction	115	0.387313	1.37602	0.0362319	0.0362319	0.0836212	2217	tags=24%	list=13%	signal=21%	8825/27134/9414/24146/143162/50848/51421/57125/84952/9863/84552/4810/65266/1364/8531/83481/11346/79778/9618/154810/9266/5912/9080/4867/54532/54566/7122/55870
BP	GO:0010810	regulation of cell-substrate adhesion	189	0.387038	1.46947	0.00657895	0.00657895	0.0304214	2254	tags=23%	list=14%	signal=20%	10085/342184/347/4811/2294/2185/5295/5800/1435/4035/2192/129080/2633/8829/1946/780/57662/340485/8322/7448/4851/5880/11117/22998/8573/7402/182/9806/3491/3728/23499/79834/3675/8874/11078/4814/5054/1029/1845/5328/79625/55612/80005/5728
BP	GO:0007098	centrosome cycle	120	0.386529	1.38231	0.0389049	0.0389049	0.0866892	3202	tags=28%	list=19%	signal=23%	10769/1647/9639/8850/84552/26005/9738/22994/153241/4751/11127/10806/5347/6491/54820/7516/5108/22995/4957/84446/85459/55755/585/57787/284403/23177/79648/64793/54461/55722/9696/348654/983/55835
BP	GO:1905952	regulation of lipid localization	113	0.385819	1.36882	0.0402878	0.0402878	0.0891077	2932	tags=26%	list=18%	signal=21%	3685/26154/4035/4023/10347/55294/51761/5020/8529/9619/7349/4790/5360/718/255738/26119/32/302/4824/336/51499/8660/6342/222008/10765/948/1149/6850/114897
BP	GO:1902105	regulation of leukocyte differentiation	214	0.385389	1.48178	0.00388601	0.00388601	0.0241139	1279	tags=14%	list=8%	signal=13%	3635/760/3398/4254/8744/54209/100/5295/2353/3725/1435/301/2621/3976/4853/55294/150372/9580/7535/51043/84959/7071/634/10221/2624/56998/5578/4179/3965
BP	GO:0072507	divalent inorganic cation homeostasis	408	0.384944	1.56627	0.00117509	0.00117509	0.0144916	1574	tags=16%	list=9%	signal=15%	5745/3792/8614/1043/2247/10874/5144/55283/4842/6359/3579/5145/3685/2185/1813/9001/1268/492/489/2905/4035/2785/133/776/1258/2830/487/6622/1907/5158/9900/2890/134/2696/55013/5020/7852/1649/1535/5621/26504/624/56302/817/84959/794/64116/10518/7779/8805/2053/3708/8811/2624/58515/4644/7137/581/123041/29887/11346/2859/51554/801/84502
BP	GO:0051283	negative regulation of sequestering of calcium ion	105	0.384789	1.35352	0.0498575	0.0498575	0.102166	1676	tags=18%	list=10%	signal=16%	2247/5144/55283/4842/2185/1813/9001/6622/1649/1535/817/84959/3708/4644/581/801/84502/825/196541
CC	GO:0005911	cell-cell junction	376	0.383694	1.54842	0.00118343	0.00118343	0.0144916	2510	tags=26%	list=15%	signal=22%	6330/81607/342184/122786/8825/5295/27134/3737/10580/284217/1308/9414/5493/24146/143162/50848/2043/51421/9900/23768/23254/1969/26047/1946/6386/28514/57662/23136/79026/57125/7535/84952/9863/8322/84552/4810/55243/65266/1364/794/84978/4851/634/8573/23705/182/8531/10076/3728/8476/128239/57493/6331/83481/57619/120/6326/11346/79778/87/51599/9618/8994/3856/154810/9266/10806/7074/196500/5912/3249/23336/90…
BP	GO:0045637	regulation of myeloid cell differentiation	213	0.383361	1.47281	0.00260078	0.00260078	0.0208987	1752	tags=17%	list=11%	signal=15%	3635/760/3398/4254/54209/2185/5295/116151/2353/3725/1435/8850/3976/4853/54681/28514/653604/55294/84959/7071/634/25893/182/10221/2624/56998/5578/554313/567/4343/6774/58508/7305/9398/171392/5925
BP	GO:0050670	regulation of lymphocyte proliferation	157	0.382517	1.41487	0.0176391	0.0176391	0.0546192	1669	tags=14%	list=10%	signal=13%	3635/1026/8744/654346/100/301/9231/3280/10451/7535/5621/51043/3133/5880/29126/58515/4179/3965/1947/10457/3481/7305
BP	GO:0008015	blood circulation	449	0.382298	1.56894	0.0011534	0.0011534	0.0144916	1795	tags=18%	list=11%	signal=17%	6330/3792/53826/3398/10874/4193/5144/4842/3579/2153/3775/1813/2006/100/1268/492/5800/1373/489/59284/80852/3761/133/776/2621/487/55799/5349/50848/1907/53822/134/6446/5724/1839/121643/28514/5020/2730/8529/785/7852/23576/1827/1535/5999/59285/7349/143282/7134/624/817/4634/566/30819/10659/634/2053/143872/93589/3708/6271/56998/2729/7137/3728/5138/6331/18/801/778/4880/27347/3778/6051/5997/3768/9722/59/2…
BP	GO:0043062	extracellular structure organization	313	0.381665	1.51743	0.00122399	0.00122399	0.0144916	1605	tags=18%	list=10%	signal=16%	1999/55959/1462/2247/3909/4811/3685/2294/84171/2006/1294/4035/2192/284217/1308/80781/2621/7132/3339/5352/50848/2022/59277/23768/3693/323/3371/780/9644/1291/56155/7448/1289/7837/1514/4851/11117/28984/79875/9806/8174/6662/9622/3491/340267/7092/149371/3679/1471/10516/3913/222663/50509/3915/8434
BP	GO:0097529	myeloid leukocyte migration	142	0.381551	1.39392	0.0319889	0.0319889	0.0767376	2696	tags=23%	list=16%	signal=19%	5144/6359/5228/3579/54209/2185/5800/1435/301/10451/1907/23396/727/566/5880/11117/1843/57126/7499/8729/5054/140885/7409/5734/3627/83692/4920/6223/4323/79647/7857/6347
MF	GO:0004857	enzyme inhibitor activity	288	0.381489	1.50479	0.00124378	0.00124378	0.0144916	2789	tags=25%	list=17%	signal=21%	124857/132864/1026/5149/2810/1294/114794/9467/85450/6620/301/6295/8850/2621/6622/27344/5270/5570/81706/55924/10406/1030/55450/200734/727/307/7349/1032/4851/25816/57600/6691/10221/718/831/6195/9806/462/10628/340267/1028/5132/51400/1471/8434/27290/10129/116729/93974/9478/221692/5054/1029/5147/302/336/25913/9546/331/5573/721/1027/1800/1031/9232/23523/9535/334/5627/306/9479
BP	GO:0003013	circulatory system process	457	0.381411	1.56742	0.00115207	0.00115207	0.0144916	1795	tags=18%	list=11%	signal=17%	6330/3792/53826/3398/10874/4193/5144/4842/3579/2153/3775/1813/2006/100/1268/492/5800/1373/489/59284/80852/3761/133/776/2621/487/55799/5349/50848/1907/53822/134/6446/5724/1839/121643/28514/5020/2730/8529/785/7852/23576/1827/1535/5999/59285/7349/143282/7134/624/817/4634/566/30819/10659/634/10413/2053/143872/93589/3708/6271/56998/2729/7137/3728/5138/57493/6331/18/801/778/4880/27347/3778/6051/5997/37…
BP	GO:0032886	regulation of microtubule-based process	214	0.37972	1.45999	0.00518135	0.00518135	0.0276356	3573	tags=30%	list=21%	signal=24%	10769/9638/9001/22924/8850/4133/6622/4135/24139/1946/57662/4131/10297/81551/126731/4744/284076/22994/25893/153241/2770/11186/4751/23499/4926/5347/6491/10142/57551/80128/25999/10382/89927/6249/348235/85459/1027/55755/58526/585/56683/5563/23271/57787/10039/10460/4281/79648/89780/64793/54461/348654/57542/8851/10615/55835/79187/1778/1859/6188/3476/5310/26586/79866
BP	GO:0046677	response to antibiotic	281	0.379637	1.49429	0.00124844	0.00124844	0.0144916	2427	tags=23%	list=15%	signal=20%	1036/6382/4193/3747/6507/2185/1813/100/1268/6778/3399/3725/2059/2308/301/9314/57578/1946/3371/3248/1938/4151/108/2934/5999/4747/94241/1843/388/2770/4780/10628/18/84557/7298/8061/929/4880/6774/5950/5997/8639/3397/5660/598/1815/3716/6678/107/5321/140885/51157/2903/1410/572/112/5728/664/4217/824/5111/1027/6688/2706
BP	GO:0050804	modulation of chemical synaptic transmission	394	0.379524	1.53771	0.00117925	0.00117925	0.0144916	2319	tags=21%	list=14%	signal=19%	10769/2668/760/43/10874/6507/6623/1136/2185/22941/1056/1813/9001/1268/2905/59284/776/112476/9378/4355/6622/6616/816/23208/2043/5270/2890/134/869/63908/10814/26045/5020/23237/64084/5621/57537/4131/2900/5999/4909/7349/3749/794/6812/7779/4885/8573/27065/2770/23621/594855/9148/18/5413/55638/11346/22849/84502/6774/7305/23228/116841/10142/1815/23467/26037/56853/8878/6529/3799/3745/107/10858/2903/2901/5…
BP	GO:2001257	regulation of cation channel activity	149	0.378848	1.39289	0.0246238	0.0246238	0.0647252	1574	tags=19%	list=9%	signal=17%	2669/146395/5144/4842/3747/54209/2185/22941/1813/6236/9001/59284/2890/79026/785/23237/817/4747/30819/8787/6271/8811/10891/4644/88/2859/801/84502
BP	GO:0097553	calcium ion transmembrane import into cytosol	117	0.378659	1.3536	0.0426743	0.0426743	0.0923219	1676	tags=19%	list=10%	signal=17%	2247/5144/55283/4842/2185/1813/9001/2905/6622/1649/1535/5621/56302/817/84959/3708/4644/581/801/84502/825/196541
BP	GO:0030198	extracellular matrix organization	312	0.378062	1.502	0.00123001	0.00123001	0.0144916	2214	tags=21%	list=13%	signal=18%	1999/55959/1462/2247/3909/4811/3685/2294/84171/2006/1294/4035/2192/284217/1308/80781/2621/7132/3339/5352/50848/2022/59277/23768/3693/323/3371/780/9644/1291/7448/1289/7837/1514/4851/11117/28984/79875/9806/8174/6662/9622/3491/340267/7092/149371/3679/1471/10516/3913/222663/50509/3915/8434/3675/5925/3249/6678/5054/302/56999/5154/79625/55790/55612
CC	GO:0098862	cluster of actin-based cell projections	129	0.377738	1.35913	0.0359195	0.0359195	0.0835384	2004	tags=19%	list=12%	signal=17%	5745/83715/25861/3775/22941/2059/9368/140469/794/389/10518/4430/151056/79955/120/87/54084/64787/113235/29881/54407/90410/4642/4036/10568
BP	GO:0050808	synapse organization	363	0.377677	1.5173	0.00119332	0.00119332	0.0144916	2002	tags=21%	list=12%	signal=19%	2668/2823/3587/43/6623/54209/22941/1056/1813/58504/5800/23544/6620/9378/9231/114798/4897/6622/816/23654/2043/5064/2743/23768/8829/869/1946/3371/26045/5020/785/9863/23237/64084/5621/4131/4744/4747/27445/65981/7402/5364/718/831/25791/7846/9806/4644/441381/26052/9148/7058/2049/55638/57549/8321/11346/3913/124925/87/3556/2119/119/26050/9722/5792/3675/7074/576/3084/4734/26037/6678/4038/1948/3643
BP	GO:0050866	negative regulation of cell activation	150	0.377518	1.3882	0.0288858	0.0288858	0.0719495	3066	tags=28%	list=18%	signal=23%	3635/3398/10461/654346/2294/1268/301/9231/221395/114757/5270/5621/9572/51043/84959/11117/634/29126/2729/3965/10457/18/7305/7301/472/5154/1845/5573/27342/6385/26191/10039/558/135/6422/5155/384/114897/613/1840/54542/3566
BP	GO:0099177	regulation of trans-synaptic signaling	395	0.377509	1.53066	0.00117647	0.00117647	0.0144916	2319	tags=21%	list=14%	signal=19%	10769/2668/760/43/10874/6507/6623/1136/2185/22941/1056/1813/9001/1268/2905/59284/776/112476/9378/4355/6622/6616/816/23208/2043/5270/2890/134/869/63908/10814/26045/5020/23237/64084/5621/57537/4131/2900/5999/4909/7349/3749/794/6812/7779/4885/8573/27065/2770/23621/594855/9148/18/5413/55638/11346/22849/84502/6774/7305/23228/116841/10142/1815/23467/26037/56853/8878/6529/3799/3745/107/10858/2903/2901/5…
BP	GO:1904062	regulation of cation transmembrane transport	288	0.377163	1.48773	0.00124378	0.00124378	0.0144916	1895	tags=22%	list=11%	signal=19%	6330/3792/53826/2669/146395/5144/4842/3747/54209/2185/22941/1813/6236/9001/59284/776/9368/487/6622/5349/2273/53822/2890/2745/79026/785/23237/53827/1535/5621/5999/130497/65266/817/84959/4747/30819/7779/8787/7402/6271/8811/10891/4644/88/581/6331/23479/2859/801/84502/255738/27347/825/196541/5997/9722/8514/10142/1815/79041/4734
BP	GO:0009314	response to radiation	409	0.377093	1.53406	0.00117509	0.00117509	0.0144916	1530	tags=15%	list=9%	signal=14%	10002/1026/3398/10874/4193/3747/6507/24/5145/1643/5957/1813/1647/5295/338811/2353/3725/8553/301/1258/6295/9600/50848/5158/90427/8493/7508/1040/6247/51761/8863/5429/1535/5475/51435/1263/6794/121457/123879/346007/1032/5934/94241/2978/15/10413/22954/93589/1843/388/9094/2779/6785/23621/5132/581/6240/64782/11346/801/778
BP	GO:1901991	negative regulation of mitotic cell cycle phase transition	217	0.376991	1.45199	0.00518135	0.00518135	0.0276356	3031	tags=28%	list=18%	signal=23%	10769/1026/4193/2810/1647/55367/2273/9314/1820/144455/5698/7832/56155/1030/1263/123879/1032/23194/5934/79791/28984/1843/25946/84936/4194/581/10457/81620/79027/5347/5925/51065/79960/57551/1029/138151/472/84446/5728/29997/51512/51499/26058/5111/1027/55755/677/84861/1063/1031/10459/6347/995/57060/51149/8091/80279/5710/5711/348654/3364
BP	GO:0048511	rhythmic process	260	0.376211	1.46912	0.00253165	0.00253165	0.0208987	2716	tags=21%	list=16%	signal=18%	3398/10874/3400/220202/1813/100/6586/3399/3737/3725/8553/8850/134/9956/55294/8863/55068/8322/55124/9572/6096/1364/7071/1644/406/15/10891/8204/10887/7298/121278/79365/4804/7301/1374/3397/1815/5601/7153/5054/55366/107/1453/10499/5728/3131/5111/1406/1454/5563/10765/2767/558/135
BP	GO:0010634	positive regulation of epithelial cell migration	129	0.375769	1.35205	0.0373563	0.0373563	0.0848115	3084	tags=22%	list=19%	signal=18%	10769/2247/2185/3725/301/8829/1839/51564/1512/388/2624/4780/5578/6662/154810/3675/6678/51157/54566/9564/80005/5168/10000/27286/306/5155/51378/3458/8828
BP	GO:0048754	branching morphogenesis of an epithelial tube	139	0.375767	1.37056	0.0372928	0.0372928	0.0848115	1410	tags=16%	list=8%	signal=15%	2668/2247/5228/4488/2294/1435/284217/9231/2022/3169/1969/8829/3371/780/4851/1512/3975/10413/56998/6662/10736/2637
BP	GO:0044843	cell cycle G1/S phase transition	247	0.375487	1.45571	0.00256739	0.00256739	0.0208987	2375	tags=20%	list=14%	signal=17%	10769/1026/3398/4193/3400/2810/1647/58480/55367/301/8900/2103/2273/9314/1820/55294/144455/7832/1030/1263/123879/1032/5934/79791/28984/25946/56241/4194/581/128239/10457/7298/81620/79027/5925/51065/79960/1018/1029/138151/472/5530/5728/815/51512/51499/26058/5111/1027
CC	GO:0062023	collagen-containing extracellular matrix	323	0.375356	1.49682	0.00120482	0.00120482	0.0144916	1692	tags=17%	list=10%	signal=16%	9518/10085/3490/1462/3909/43/5803/4811/2006/1294/2192/4240/284217/1308/64093/301/80781/6275/9672/3339/6277/59277/4052/5270/1509/869/1946/3371/1291/51435/307/7448/1289/7837/143282/346007/1514/1512/11117/8573/79875/3491/3965/462/340267/4684/7058/10516/3913/333/50509/3915/2817/2162/439921
BP	GO:0007568	aging	269	0.374387	1.47006	0.00249688	0.00249688	0.0208987	1388	tags=13%	list=8%	signal=12%	10769/5745/3635/1026/3398/5144/347/100/1268/2353/3725/4035/133/6622/2022/9516/1938/51761/2934/2730/1030/5621/7352/2055/1644/406/4000/10891/317/2027/4780/2729/1028/657/18/567
BP	GO:0051048	negative regulation of secretion	183	0.374148	1.41232	0.0119363	0.0119363	0.0427842	2136	tags=19%	list=13%	signal=17%	10874/2294/1813/100/1268/301/2621/6622/3976/7132/23208/2633/134/5020/8529/114088/307/7349/65266/4851/7779/634/28984/94121/3965/18/27347/1815/3084/152/55366/3745/336/5530/5734
CC	GO:0043235	receptor complex	330	0.373907	1.48965	0.00121212	0.00121212	0.0144916	2071	tags=19%	list=12%	signal=17%	5745/10461/1136/3685/84171/2185/22941/2905/59284/10580/4035/2059/2322/26996/5365/7132/4853/2022/2570/23654/2674/2043/1969/2890/3693/8829/780/6386/3977/57125/7535/925/2900/5362/126129/214/4919/5979/4851/11117/634/9568/65981/5364/657/567/3679/2049/3597/973/929/3588/116444/134957/7301/26050/3675/117584/7036/4036/3643/2903/2901
BP	GO:0070507	regulation of microtubule cytoskeleton organization	182	0.373553	1.40712	0.013369	0.013369	0.0450239	3818	tags=31%	list=23%	signal=24%	10769/22924/8850/4133/6622/4135/24139/1946/57662/4131/10297/81551/126731/22994/153241/2770/11186/4751/4926/5347/6491/10142/57551/25999/10382/89927/6249/348235/85459/1027/55755/58526/5563/23271/57787/10039/10460/4281/79648/89780/64793/54461/348654/8851/10615/55835/79187/1778/1859/6188/5310/26586/79866/59341/55521/23122/23116
BP	GO:0051056	regulation of small GTPase mediated signal transduction	316	0.373345	1.48726	0.00121359	0.00121359	0.0144916	3585	tags=31%	list=22%	signal=25%	4254/50650/58504/9901/58480/1435/2059/257106/9639/57636/9289/4853/10451/7410/8829/84952/23092/57568/23362/23101/389/79658/4649/4851/440730/5880/9411/143872/55701/84144/81848/221178/388/89846/25791/84033/23380/50649/57493/50618/23229/26230/55160/2859/23221/393/57480/9266/64787/9938/3675/91614/7074/157285/8874/3084/23370/26037/11214/8729/8878/7409/29127/253980/9743/27342/201163/10672/440073/8660/84…
BP	GO:0014074	response to purine-containing compound	133	0.372766	1.35434	0.0377095	0.0377095	0.0853256	3245	tags=28%	list=19%	signal=23%	1036/6382/2185/1373/2353/3725/5724/7425/6528/5020/7480/10518/15/1843/10891/5138/8061/10142/79041/6678/6529/1261/6262/5728/5322/22953/677/7442/682/135/5026/4724/6772/1277/3784/2039/50506
BP	GO:0031023	microtubule organizing center organization	128	0.372642	1.34095	0.0456491	0.0456491	0.0952935	4302	tags=38%	list=26%	signal=29%	10769/1647/9639/8850/9648/84552/26005/9738/22994/153241/4751/11127/10806/5347/6491/54820/7516/5108/22995/4957/84446/85459/55755/585/57787/284403/23177/79648/64793/54461/55722/9696/348654/983/55835/151648/54930/23224/9371/23122/50855/56890/675/5048/128866/1639/29901/93323/9662
BP	GO:0051100	negative regulation of binding	155	0.372587	1.37552	0.027248	0.027248	0.0695064	2743	tags=24%	list=16%	signal=20%	124857/3398/3400/4488/3399/3725/4133/341405/55294/1649/56155/166/84630/56998/4751/581/9421/146198/567/55118/255738/9044/171392/5792/3397/2962/203228/4824/5530/1636/8658/3300/1454/10459/1601/5899/8091
MF	GO:0017048	Rho GTPase binding	171	0.372518	1.39636	0.0146277	0.0146277	0.0485297	2140	tags=22%	list=13%	signal=19%	10602/50650/1795/9901/2059/9639/10451/7410/10811/84552/23101/55701/221178/8531/89846/25791/84033/23380/50649/128239/50618/114793/23229/647135/26230/55160/393/57480/64787/7074/8874/11078/23370/11214/139818/7409/653464
BP	GO:0010959	regulation of metal ion transport	321	0.372312	1.48302	0.00120919	0.00120919	0.0144916	1895	tags=21%	list=11%	signal=19%	6330/3792/53826/8614/2669/5144/4842/3747/54209/2185/5957/1813/6236/9001/4638/776/9368/487/6622/5349/816/2273/53822/5270/134/2745/79026/785/7852/53827/1535/5621/5999/130497/7349/65266/817/84959/30819/7779/8573/8787/7402/6271/8811/4644/88/581/6331/567/3603/23479/2859/801/84502/255738/27347/116444/825/196541/9722/8514/10142/1815/79041/4734
BP	GO:1901988	negative regulation of cell cycle phase transition	231	0.372201	1.43722	0.00903226	0.00903226	0.0349296	3031	tags=28%	list=18%	signal=23%	10769/1026/4193/2810/1647/55367/2273/9314/1820/144455/5698/7832/56155/1030/1263/123879/1032/23194/5934/79791/28984/1843/25946/56241/84936/4194/581/10457/5017/81620/79027/5347/5925/51065/79960/57551/51343/1029/138151/472/84446/5728/29997/51512/51499/26058/5111/1027/55755/677/84861/1063/1031/10459/6347/995/57060/51149/8091/80279/51514/5710/5711/348654/3364
BP	GO:0007160	cell-matrix adhesion	195	0.371536	1.41557	0.0091623	0.0091623	0.0352192	2254	tags=22%	list=14%	signal=19%	342184/347/4811/3685/2185/5295/10580/1435/4035/1308/3693/8829/1946/780/57662/340485/7448/11117/22998/8573/7402/182/8174/88/3728/3679/10516/87/23499/50509/79834/3675/7074/8874/10420/4814/5054/1029/56999/1845/5328/55612/5728
CC	GO:0034702	ion channel complex	261	0.371493	1.45019	0.00380228	0.00380228	0.0239466	1718	tags=18%	list=10%	signal=17%	6330/5144/4842/3747/1136/3775/2185/22941/2905/59284/3737/2059/55367/3761/776/1258/487/55799/6616/57828/2570/2743/2890/26047/6337/55013/785/84230/2900/126129/59285/3749/1364/3738/30819/3783/93589/285175/6331/6326/801/778/116444/170850/134957/3778/9722/8514
BP	GO:0043112	receptor metabolic process	174	0.37148	1.38984	0.0161074	0.0161074	0.0520449	3050	tags=28%	list=18%	signal=23%	43/146395/3579/3685/1813/59284/4035/133/6295/6622/6616/2890/6386/26045/9863/23237/10133/9572/634/22876/27065/26052/407/50632/255738/26119/4905/1815/3084/4734/1948/302/55111/9737/54806/160/284654/948/116985/89780/1742/88455/6850/6456/375/3458/10368/4983
BP	GO:0061572	actin filament bundle organization	144	0.371316	1.3594	0.0358127	0.0358127	0.0835182	2421	tags=22%	list=15%	signal=19%	23671/83715/2185/2006/5295/10580/2059/9639/3693/8829/144347/100533183/389/22998/28984/388/4430/390/120/11346/55160/87/119/3397/221692/5734/5829/253980/6385/10163/585
BP	GO:0000187	activation of MAPK activity	140	0.371242	1.3578	0.0428177	0.0428177	0.0923219	2268	tags=19%	list=14%	signal=16%	9518/2247/1848/5149/2785/257397/7852/727/5979/10392/7316/7039/7161/128239/4293/200958/27347/1815/1464/3084/57551/25759/3643/5605/4217/9043
BP	GO:0031032	actomyosin structure organization	183	0.370692	1.39928	0.0132626	0.0132626	0.0448902	2421	tags=23%	list=15%	signal=20%	23671/122786/2185/2006/84665/5295/10580/9639/55561/50848/3693/8829/23136/389/84978/9172/22998/28984/84033/88/8476/11113/55160/29767/3856/825/4607/11214/221692/541468/58/5734/54566/5829/29127/253980/5573/4606/6385/10163/1265/585
BP	GO:2000146	negative regulation of cell motility	240	0.370608	1.42953	0.00649351	0.00649351	0.0303855	2140	tags=21%	list=13%	signal=19%	23671/2247/347/1813/100/9901/4035/2192/9368/9231/5365/9289/9314/114757/2022/104/134/138429/9863/727/94241/84978/4851/11117/22998/28984/1843/182/10221/388/10076/10891/23380/4780/54328/3728/657/83481/647135/393/6774/8434/5912/3084/5054/89927/56999/1845/11057/5734/653464
BP	GO:0031589	cell-substrate adhesion	314	0.370342	1.47391	0.00121951	0.00121951	0.0144916	2294	tags=22%	list=14%	signal=20%	10085/342184/10461/347/4811/3685/2294/2185/5295/5800/10580/1435/4035/2192/1308/129080/2621/3339/59277/2633/3693/8829/1946/780/57662/340485/8322/7448/4851/5880/11117/22998/8573/7402/182/9806/23380/8174/3491/88/3728/3679/2049/10516/79778/3913/87/23499/50509/3915/79834/7301/3675/3397/7074/8874/11078/10420/4814/5054/1029/56999/1845/5328/79625/55612/80005/5728/5829/5613
BP	GO:0048813	dendrite morphogenesis	138	0.370087	1.34952	0.0441379	0.0441379	0.0933628	2865	tags=26%	list=17%	signal=22%	1136/22941/85442/4133/816/22903/2043/4135/8829/23237/6794/9201/79791/65981/25791/56965/26052/2049/26050/3397/7074/22906/4734/26037/221692/4038/5530/5728/815/4205/9912/80725/2534/23098/1742/57498
MF	GO:0051015	actin filament binding	186	0.3696	1.39622	0.0159574	0.0159574	0.0517103	1852	tags=19%	list=11%	signal=17%	4645/3983/83715/8522/161176/84448/22989/7125/4646/23345/1938/57662/2934/9050/7134/822/55930/9172/7402/122622/4644/7137/88/4430/57619/120/79778/11034/87/23499/119/4607/11078/644150/4642
CC	GO:0098793	presynapse	451	0.369416	1.5149	0.00116009	0.00116009	0.0144916	3050	tags=28%	list=18%	signal=23%	8492/53826/2823/10874/4842/3747/8825/1056/1813/9001/1268/492/6457/3737/1174/6620/776/1258/112476/9378/85439/6622/6616/23208/388662/2043/9892/9900/2890/134/23396/10814/8497/30061/5020/8745/114088/2900/2055/4919/4909/7349/3749/794/6511/3382/9899/3738/4747/6812/8867/27445/1644/8573/1212/55530/5173/8675/127833/23621/594855/1008/26052/5414/6854/51760/5138/22987/5413/22848/6861/6326/547/8061/6512/13495…
MF	GO:0019902	phosphatase binding	173	0.369345	1.38283	0.0146862	0.0146862	0.0485795	3130	tags=26%	list=19%	signal=21%	81846/54843/5295/6778/286/2308/9368/23139/9863/343521/9666/3783/634/9961/4751/3728/51400/11127/11215/9814/25827/6774/163882/116729/2962/221692/3716/140885/572/219537/4217/5829/1027/26751/8660/8897/1742/54386/6850/51231/6772/79037/220004/3784/23645
BP	GO:0031331	positive regulation of cellular catabolic process	334	0.368783	1.47214	0.00241255	0.00241255	0.0208987	2765	tags=24%	list=17%	signal=20%	10769/4193/26353/54209/2185/154214/4035/2308/27244/2103/9531/6622/10140/143686/255488/55294/10346/7832/10133/1263/54832/6794/5209/10392/94241/440730/10221/79156/122809/4780/2729/26263/581/127544/85409/22849/4343/255738/23677/55212/83667/5347/1374/5305/93974/5601/4036/9567/203228/3643/56829/91304/472/1453/572/207063/22933/25782/8570/6449/5728/664/29997/26058/201163/3300/1454/25897/665/26234/8660/5…
BP	GO:0050707	regulation of cytokine secretion	142	0.368651	1.3468	0.0431154	0.0431154	0.092445	3066	tags=25%	list=18%	signal=21%	654346/1813/4035/301/4023/2621/23208/2633/6711/727/307/3098/28984/23705/29126/58515/3965/965/929/3556/55366/336/5734/55612/112744/27342/26191/64109/192683/3552/1149/5590/6850/384/3458/3566
BP	GO:0010951	negative regulation of endopeptidase activity	166	0.368411	1.3757	0.0241287	0.0241287	0.0641936	2797	tags=24%	list=17%	signal=20%	124857/4193/2810/1294/7483/2621/6622/9314/27344/5270/10406/2537/727/7448/1032/25816/6691/718/831/6195/9806/462/340267/1471/4804/8434/27290/117584/5054/1410/331/51499/721/1800/9232/64780/334/135/5627/653145
BP	GO:0048545	response to steroid hormone	338	0.368391	1.47452	0.00239521	0.00239521	0.0208987	2238	tags=20%	list=13%	signal=17%	10002/3490/760/1036/1026/6382/4193/2908/6586/1373/2353/2308/133/301/2322/2103/5915/4246/57828/2022/3169/5724/8611/5020/1535/7352/9572/6096/7349/1364/4747/4851/406/15/10413/5069/1843/10076/10891/8204/10628/7298/8061/121278/153222/196541/55818/85315/5925/3651/4734/10888/11214/6678/4824/336/1261/572/23558/11057/58/10521/6663/161582/10499/55885
BP	GO:0006979	response to oxidative stress	389	0.366846	1.48381	0.0023753	0.0023753	0.0208987	2508	tags=20%	list=15%	signal=17%	132864/8614/6382/4193/3747/347/2185/5625/10202/100/6778/2353/3725/50484/2308/301/27244/6622/143686/9314/114757/253827/1938/4151/55294/2730/1535/5621/51435/1263/7352/2055/7837/7349/94241/406/135112/1843/388/10891/55270/653361/58515/4780/2729/10628/3163/10516/8321/84557/8061/22921/2119/83667/2878/2643/5660/5601/140809/9124/7515/140885/51157/1410/572/22933/10110/664/4217/5829/824/7296/5111/2706/2879…
BP	GO:0030336	negative regulation of cell migration	229	0.366696	1.41459	0.00905563	0.00905563	0.0349296	2345	tags=23%	list=14%	signal=20%	23671/2247/347/1813/100/9901/4035/9368/9231/5365/9289/9314/114757/2022/104/134/138429/9863/727/94241/4851/11117/22998/28984/1843/182/10221/388/10076/10891/23380/4780/54328/3728/657/83481/647135/393/6774/8434/5912/3084/5054/89927/56999/1845/11057/5734/653464/5728/27342/201163
CC	GO:0016324	apical plasma membrane	271	0.366313	1.43587	0.00505051	0.00505051	0.02733	3014	tags=24%	list=18%	signal=20%	5745/5144/3747/23255/3775/22941/4008/5800/301/9368/55754/51421/6337/28514/8529/1535/6813/84552/4810/56302/1364/51364/10392/4851/634/182/2779/128338/8323/5337/151056/57619/200958/523/27347/154810/3778/113235/29881/3249/5873/1464/1836/23370/9854/4036/10568/10159/389015/5728/6340/160/22953/64284/1800/10327/948/5420/4478/4640/5590/259266/368/146894/7070/6520
BP	GO:0072330	monocarboxylic acid biosynthetic process	200	0.366019	1.3999	0.0130378	0.0130378	0.0448902	2561	tags=22%	list=15%	signal=19%	26031/5166/1462/240/6507/301/4023/9536/1907/55301/134429/3248/220/9572/79152/2593/53632/79966/634/2053/5565/5947/6785/4644/5564/18/79993/242/32/64577/1464/114876/3992/10858/11057/5007/5825/10090/58526/633/2879/5563/9885/6342
MF	GO:0042277	peptide binding	229	0.365907	1.41154	0.00905563	0.00905563	0.0349296	2152	tags=19%	list=13%	signal=17%	5745/43/54209/5295/9445/6890/4035/11015/5480/9536/3339/2043/2890/323/2696/30061/5621/8322/30819/3133/3836/3119/1212/8811/23621/4820/25825/1471/929/23428/4804/114928/26119/9452/9854/9478/322/3643/26232/2903/1410/5530/9546
BP	GO:0051017	actin filament bundle assembly	140	0.365801	1.33789	0.0455801	0.0455801	0.0952935	2421	tags=21%	list=15%	signal=18%	23671/83715/2185/2006/5295/10580/2059/9639/3693/8829/389/22998/28984/388/4430/390/120/11346/55160/87/119/3397/221692/5734/5829/253980/6385/10163/585
BP	GO:0045732	positive regulation of protein catabolic process	199	0.365239	1.39333	0.011811	0.011811	0.0424716	2478	tags=21%	list=15%	signal=18%	10769/4193/54209/2185/154214/4035/2308/255488/55294/10297/1263/440730/22954/10221/122809/4780/6662/2729/26263/127544/85409/255738/55212/5347/4905/93974/5601/4734/4036/51343/91304/1453/22933/6449/5728/29997/3300/1027/23192/1454/25897/26234
BP	GO:0010466	negative regulation of peptidase activity	172	0.364254	1.36505	0.0252996	0.0252996	0.0657063	2989	tags=25%	list=18%	signal=21%	124857/4193/2810/1294/7483/2621/6622/9314/27344/5270/10406/2537/727/7448/1032/25816/6691/718/831/6195/9806/462/340267/1471/4804/8434/27290/117584/5054/1410/331/51499/721/1800/9232/64780/334/135/5627/653145/2876/117166/280664
BP	GO:0007416	synapse assembly	153	0.363766	1.34101	0.0383037	0.0383037	0.0862597	2617	tags=27%	list=16%	signal=23%	2823/43/22941/1056/1813/9378/9231/114798/4897/6622/23654/23768/869/1946/26045/5020/9863/64084/4131/27445/5364/9806/441381/26052/7058/2049/8321/3556/119/26050/576/3084/4038/1948/5728/22883/64284/27253/54549/9423/84694/27286
CC	GO:0045211	postsynaptic membrane	286	0.363705	1.43329	0.00375	0.00375	0.023811	2319	tags=23%	list=14%	signal=20%	53826/146395/3747/1136/8825/22941/1813/5800/2905/59284/80852/286/3761/112476/9231/114798/4897/2570/2043/2743/2890/134/8829/869/23345/26045/23237/64084/55450/2900/23362/3738/7779/9568/8787/7402/27065/80315/23380/1008/26052/88/9148/23229/11346/22849/116444/3778/7074/10142/9123/152/26037/9478/6529/322/1948/3745/107/2903/2901/388135/5728/815/9743/22883
BP	GO:0051606	detection of stimulus	265	0.363608	1.42242	0.00503145	0.00503145	0.02733	1623	tags=15%	list=10%	signal=13%	10002/24/25861/54209/5145/2294/5957/1258/6295/9600/5158/5270/134/1040/6247/51761/9619/7852/5475/346007/10392/30819/2978/10413/93589/80036/23705/7316/9094/2779/6785/23621/3728/132112/5132/79955/801/778/92840
BP	GO:0032386	regulation of intracellular transport	347	0.363475	1.45587	0.00240385	0.00240385	0.0208987	3201	tags=26%	list=19%	signal=21%	9638/4193/23255/347/2810/2294/9001/5295/58480/5366/2621/9531/51308/4133/487/55754/9648/26229/55294/6813/5621/4131/1263/22902/7134/4744/6812/5880/22994/25893/27113/22876/2624/6830/5784/7161/3965/88/3728/65055/127933/79778/26993/255738/92840/26119/9847/9585/4926/4607/93974/4734/9478/51465/5108/302/80128/3799/3745/5605/1410/572/55612/51512/27342/3429/665/56850/6342/948/1601/9912/3684/10427/4478/2534…
BP	GO:0007565	female pregnancy	168	0.363048	1.35957	0.0278515	0.0278515	0.0704318	2050	tags=16%	list=12%	signal=14%	3490/8614/56977/5228/1268/2353/2192/133/3976/79816/780/3248/5020/7349/1364/5016/5069/6866/3965/8061/8434/5997/54407/3675/152/5744/6019
BP	GO:0043588	skin development	238	0.363021	1.40415	0.00900901	0.00900901	0.0349296	3065	tags=26%	list=18%	signal=22%	57822/10468/3872/4488/2810/26154/57561/301/5493/23254/1969/28514/51761/7480/1289/79152/144501/1364/1514/58495/4851/10413/182/2355/4644/387264/6662/3516/3728/10628/8323/440021/5017/5453/50509/3856/80326/242/26050/4926/3675/5660/3229/4038/55366/2125/5154/55612/55870/23022/10058/677/1832/114803/27152/8861/353135/94234/613/8202/55504/1001/1277
MF	GO:0046873	metal ion transmembrane transporter activity	388	0.362137	1.46401	0.00237812	0.00237812	0.0208987	2071	tags=18%	list=12%	signal=16%	6330/26266/2823/55283/3747/6507/3685/3775/6560/1268/492/489/2905/59284/3737/284525/3761/131096/776/2621/487/55799/9058/6616/388662/93129/6528/6337/30061/9498/785/2900/26504/59285/56302/3749/6511/64116/3738/30819/3783/7779/93589/80036/3708/84286/6526/5138/6331/123041/6326/778/84502/116444/9990/29985/170850/3778/3768/7991/8514/343450/3249/79041/6529/302/10568/3745/3781/2903/2901
BP	GO:0010506	regulation of autophagy	312	0.361686	1.43694	0.00123001	0.00123001	0.0144916	3804	tags=30%	list=23%	signal=23%	10769/9638/3587/26353/23255/54209/2308/27244/9531/6622/143686/90427/534/340485/55294/10346/257397/10133/1649/1263/54832/6794/53632/10392/94241/5565/3708/55332/79156/340371/128338/535/155066/5564/58528/149371/523/25827/1917/6774/23677/83667/5305/93974/5660/90410/4734/203228/472/572/207063/22933/25782/8925/664/140710/201163/200576/665/26191/5563/84861/27/5899/84749/440275/8897/23118/3458/387104/977…
BP	GO:0030100	regulation of endocytosis	180	0.36138	1.35885	0.0253333	0.0253333	0.0657063	3190	tags=31%	list=19%	signal=25%	146395/54209/1813/6457/4035/85439/10347/6622/23208/9892/6386/28514/26045/9863/23237/7448/2624/718/9094/567/22848/929/50632/255738/26119/57126/1815/7036/5054/1948/302/25999/5530/54806/27342/160/64284/284654/27/192683/9765/948/1601/558/89780/1742/88455/6850/1191/6456/375/5867/4983/23513/51479/1759
BP	GO:0070588	calcium ion transmembrane transport	278	0.360497	1.41616	0.00625782	0.00625782	0.0295586	1703	tags=17%	list=10%	signal=16%	2823/2669/2247/5144/55283/4842/3685/2185/1813/6236/9001/492/489/2905/59284/776/2621/487/6622/55799/93129/55013/79026/785/1649/1535/5621/59285/56302/817/84959/93589/80036/8787/3708/6271/4644/5138/581/123041/2859/801/778/84502/116444/825/196541/9722
BP	GO:2000058	regulation of ubiquitin-dependent protein catabolic process	144	0.36002	1.31804	0.046832	0.046832	0.0968518	2450	tags=19%	list=15%	signal=17%	10769/4193/2185/154214/255488/6386/55294/1263/7480/440730/10221/122809/4780/2729/26263/127544/85409/55212/5347/5601/1453/22933/6449/5728/29997/3300/1454/25897
BP	GO:0050663	cytokine secretion	168	0.359738	1.34718	0.030504	0.030504	0.0742443	3080	tags=25%	list=18%	signal=21%	654346/3685/1813/4035/301/4023/2621/23208/2633/6711/727/307/51043/4851/3098/28984/23705/29126/58515/3516/3965/965/929/3556/55366/336/5734/55612/112744/27342/26191/64109/192683/948/3552/1149/5590/6850/384/3458/3566/19
MF	GO:0030545	receptor regulator activity	351	0.359444	1.44081	0.00240096	0.00240096	0.0208987	1742	tags=15%	list=10%	signal=14%	9518/2668/124857/8614/2247/10468/4254/6359/5228/7031/8744/7483/338811/64388/1435/133/2621/3976/94027/1907/23768/7425/1839/1946/2922/2520/5020/10512/7480/727/56034/7837/4909/7349/1114/182/4062/10447/5173/7039/5623/10457/3603/258/10637/4880/116173/255738/3481/80326/8190/112609/200081
BP	GO:0017157	regulation of exocytosis	195	0.359213	1.36862	0.0209424	0.0209424	0.0603237	3066	tags=31%	list=18%	signal=25%	6382/2294/1813/9001/1268/776/301/6622/23208/5724/63908/6386/10814/114088/6813/6812/4851/27445/5880/634/8573/2624/94121/127833/23621/594855/5414/3965/51760/5413/6861/134957/57126/4905/5873/3745/107/2901/815/5865/57586/27342/6385/9581/192683/64780/3684/5899/135/55503/6850/320/8448/613/255057/375/3458/9146/6853/3566
BP	GO:0044706	multi-multicellular organism process	192	0.358965	1.36165	0.021164	0.021164	0.0607129	1943	tags=16%	list=12%	signal=14%	3490/8614/56977/5228/1268/2353/2192/133/3976/79816/8605/5270/5724/780/3248/5020/7349/1364/406/5016/5069/6866/3965/8061/8434/5997/54407/3675/152/5744
BP	GO:0001763	morphogenesis of a branching structure	182	0.358945	1.3521	0.0240642	0.0240642	0.0641936	1410	tags=15%	list=8%	signal=14%	2668/2247/5228/4488/2294/1813/1435/284217/133/9231/1746/2022/59277/3169/1969/8829/3371/780/10512/4851/1512/3975/10481/10413/56998/6662/10736/2637
BP	GO:0006875	cellular metal ion homeostasis	467	0.358776	1.47416	0.00116009	0.00116009	0.0144916	2880	tags=24%	list=17%	signal=20%	5745/3792/8614/1043/2247/10874/5144/55283/4842/6359/3579/5145/3685/2185/1813/9001/1268/492/489/2905/4035/2785/133/776/1258/2830/487/6622/1907/5158/9900/2890/134/2696/55013/30061/5020/51310/7852/1649/1535/5621/624/56302/817/84959/794/64116/10518/7779/2053/3708/8811/2624/58515/4644/7137/581/3163/123041/23479/11346/2859/523/51554/801/84502/2495/3778/825/113235/196541/79608/1815/79041/7036/302/5739/2…
BP	GO:0032388	positive regulation of intracellular transport	217	0.358576	1.38107	0.0168394	0.0168394	0.0532974	3315	tags=26%	list=20%	signal=21%	9638/4193/23255/2810/5295/58480/5366/2621/9531/4133/487/55754/26229/55294/5621/1263/22902/6812/5880/22994/27113/2624/7161/88/3728/79778/26119/9847/9585/4926/4734/5108/302/80128/3799/3745/572/51512/6342/1601/3684/4478/2534/6850/375/51128/3458/23368/3566/9747/9776/8851/8673/10615/123264/51024
BP	GO:0051924	regulation of calcium ion transport	209	0.358417	1.37669	0.0195312	0.0195312	0.0583705	1866	tags=19%	list=11%	signal=17%	8614/2669/5144/4842/2185/5957/1813/6236/9001/4638/776/487/6622/816/79026/785/7852/1535/5621/5999/7349/817/84959/7779/8573/8787/6271/4644/581/3603/2859/801/84502/116444/825/196541/9722/1815/79041
BP	GO:0003205	cardiac chamber development	160	0.35807	1.32585	0.0424077	0.0424077	0.0922988	1450	tags=19%	list=9%	signal=17%	3398/4193/9249/4488/2294/6586/1363/5915/3280/4853/2022/4052/8829/10512/7134/4634/58495/4851/182/57167/3516/7137/3491/4194/5138/57493/9421/6331/657/8321
BP	GO:0043491	protein kinase B signaling	215	0.358054	1.3774	0.0168612	0.0168612	0.0532974	2713	tags=19%	list=16%	signal=16%	9518/2247/4254/10461/1813/5295/23612/9368/2621/143686/9314/2022/1969/1839/9863/1649/1263/6794/5979/5880/22876/388121/7039/6662/3481/7301/83667/3084/3643/4824/7409/5154/22933/5728/29997/201163/8660/677/23551/6347/558
BP	GO:0045930	negative regulation of mitotic cell cycle	302	0.357918	1.42114	0.00123001	0.00123001	0.0144916	3199	tags=27%	list=19%	signal=23%	10769/1026/4193/2810/1647/7483/55367/9368/54766/2273/9314/1820/7508/144455/5698/10950/146691/7832/9863/56155/1030/1263/51696/123879/1032/23194/5934/79791/28984/23087/1843/25946/84936/4194/581/10457/5017/81620/79027/5347/5925/598/51065/79960/7153/57551/1029/138151/4824/472/84446/5728/29997/51512/51499/26058/8658/5111/1027/55755/677/84861/1063/1031/9232/10459/6347/995/57060/51149/8091/79648/144715/…
BP	GO:0043010	camera-type eye development	285	0.357338	1.40804	0.00625782	0.00625782	0.0295586	1492	tags=14%	list=9%	signal=13%	10002/2823/57822/43/4901/10461/5145/6094/220202/7483/23424/3725/284217/1746/22989/4081/9314/5158/1969/8829/121643/6247/28514/51761/220/8322/7431/4810/2055/6096/5979/9172/3975/182/2779/6662/130916/1028/581/6240/3913
BP	GO:0007163	establishment or maintenance of cell polarity	200	0.357334	1.36668	0.0169492	0.0169492	0.0532974	1794	tags=16%	list=11%	signal=14%	9638/23255/8825/2294/2185/58480/284217/286/9368/9231/3280/4133/51421/57662/2934/4131/84552/6794/22902/389/4649/4000/388/390/11004/154810/9585/4926/10806/5347/54820
CC	GO:0045177	apical part of cell	327	0.35671	1.41994	0.00364964	0.00364964	0.0236534	2004	tags=18%	list=12%	signal=16%	5745/760/4645/5144/3747/23255/3775/22941/4008/5800/4035/301/9368/221395/55754/51421/4646/6337/28514/8529/1535/6813/84552/4810/56302/1364/51364/10392/4851/634/182/2779/51626/128338/4430/8323/5337/151056/29887/57619/200958/523/27347/154810/92840/3778/79659/113235/29881/3249/5873/1464/1836/23370/9854/4036/5108/10568
MF	GO:0005261	cation channel activity	295	0.356212	1.4109	0.00493827	0.00493827	0.0269847	2071	tags=19%	list=12%	signal=17%	6330/2823/55283/3747/1136/3685/3775/2185/1268/2905/59284/3737/3761/131096/776/1258/2621/55799/6616/93129/2890/6337/785/2900/59285/56302/3749/3738/30819/3783/93589/80036/3708/84286/285175/5138/6331/123041/6326/778/84502/116444/170850/3778/3768/8514/343450/3249/79041/302/3745/3781/1261/2903/2901
BP	GO:0050807	regulation of synapse organization	186	0.356006	1.34487	0.0265957	0.0265957	0.0683117	1957	tags=21%	list=12%	signal=19%	2823/3587/1813/58504/5800/9378/9231/114798/4897/6622/816/2043/23768/869/1946/26045/5020/23237/64084/5621/65981/25791/7846/441381/26052/9148/7058/2049/57549/8321/3556/2119/26050/7074/576/4734/26037/6678/4038
BP	GO:0071805	potassium ion transmembrane transport	178	0.35594	1.33757	0.0319149	0.0319149	0.0767376	2254	tags=23%	list=14%	signal=20%	3792/3747/6507/54209/3775/6560/3737/284525/3761/131096/776/6616/2273/5621/5999/65266/3749/3738/30819/3783/8811/84286/88/123041/27347/9990/170850/3778/3768/9722/8514/343450/10142/3249/79041/4734/3745/3781/51305/389015/5728
CC	GO:1902495	transmembrane transporter complex	281	0.355766	1.40033	0.00749064	0.00749064	0.031157	1718	tags=17%	list=10%	signal=16%	6330/5144/4842/3747/1136/3775/2185/22941/2905/59284/3737/2059/55367/3761/776/1258/487/55799/6616/57828/2570/2743/2890/26047/6337/55013/785/84230/2900/126129/59285/3749/1364/3738/30819/3783/93589/285175/6331/6326/801/778/116444/170850/134957/3778/9722/8514
BP	GO:0002793	positive regulation of peptide secretion	221	0.355736	1.36681	0.0156863	0.0156863	0.0511289	3066	tags=23%	list=18%	signal=19%	43/10874/654346/54209/1813/4035/4023/134/6711/2696/2922/9619/727/7349/3133/3783/3098/28984/23705/29126/94121/58515/3965/965/18/55638/929/3556/5950/7036/3651/9854/322/3799/29085/572/5734/55612/112744/8660/26191/64109/192683/135/3552/5590/6850/65220/375/3458/3566
BP	GO:0006897	endocytosis	489	0.35558	1.46175	0.00115875	0.00115875	0.0144916	2897	tags=26%	list=17%	signal=22%	8492/3587/43/146395/3579/54209/84171/1056/1813/9844/58480/59284/6457/4035/4240/1174/6620/133/6295/85439/10347/6622/6616/3339/23208/9892/4646/2890/23396/6386/28514/126432/26045/2934/54492/85377/9863/23237/51435/1808/10079/7448/261729/8867/634/8527/1212/22876/2624/718/374868/9094/56241/127833/26052/51257/407/53944/51760/50618/567/29887/22848/6861/81035/23221/333/929/50632/51554/255738/9266/26119/99…
BP	GO:0051896	regulation of protein kinase B signaling	192	0.355339	1.34789	0.0238095	0.0238095	0.0641936	1183	tags=11%	list=7%	signal=10%	9518/2247/4254/1813/5295/23612/9368/2621/143686/9314/2022/1969/1839/9863/1649/6794/5979/5880/22876/388121/7039
CC	GO:0005874	microtubule	392	0.354922	1.43632	0.00237248	0.00237248	0.0208987	3232	tags=30%	list=19%	signal=25%	9638/22924/83473/51308/4133/4135/24139/3800/83593/11076/57662/284451/22911/374654/344148/4131/10297/1808/81631/126731/84790/3798/284076/8867/55137/1768/166614/7846/154313/51361/4644/11186/26052/51626/4751/55346/11127/55638/57619/84557/547/26140/347240/801/11004/393/10513/23499/3796/79659/9702/9585/4926/8514/5347/2009/7074/54820/89796/51673/27285/90990/51203/6990/54839/9055/11258/3799/6840/5605/14…
CC	GO:0008021	synaptic vesicle	177	0.354626	1.33233	0.0371846	0.0371846	0.0848115	3046	tags=31%	list=18%	signal=25%	1813/9001/112476/85439/6622/6616/23208/388662/9892/9900/2890/30061/114088/4909/3382/9899/1644/1212/55530/8675/127833/23621/594855/5414/6854/22987/5413/6861/547/134957/116841/598/2903/51305/6449/273/23312/84446/5865/9143/11311/23025/23546/23673/192683/23176/1742/10228/320/6456/8448/255057/6853/5867
MF	GO:0005543	phospholipid binding	379	0.354567	1.43212	0.00237248	0.00237248	0.0208987	3102	tags=29%	list=19%	signal=24%	81846/54209/54843/51375/23612/1373/4240/301/2621/6622/143162/9600/23208/8605/8436/9892/4139/114884/5724/6711/6386/6247/9644/85377/9619/23092/4131/221749/94120/307/57476/116987/27445/3708/182/1606/5360/388121/79156/64342/653361/94121/84033/127833/84936/23178/88/4430/51760/5337/29887/6861/84557/55803/26119/9847/4926/23541/399979/5660/23161/9854/8729/8733/114876/302/5321/336/115548/572/53349/5007/84…
BP	GO:0097193	intrinsic apoptotic signaling pathway	270	0.354383	1.38809	0.0075662	0.0075662	0.0313544	2371	tags=19%	list=14%	signal=16%	1026/4193/60401/2810/5625/5295/23612/5366/50484/9368/487/7132/8795/90427/1969/55294/1649/2537/6794/624/1032/57600/22954/3708/27113/25946/8531/79156/317/58515/4780/7161/5414/581/64782/6326/29965/51246/598/51065/3651/138151/4824/472/572/664/4217/51499/201163/6498
BP	GO:0006816	calcium ion transport	364	0.354146	1.42318	0.00238379	0.00238379	0.0208987	1703	tags=17%	list=10%	signal=15%	8614/2823/2669/2247/5144/55283/4842/3685/2185/5957/1813/6236/9001/492/489/4638/2905/59284/776/2621/487/6622/55799/816/93129/55013/79026/785/7852/1649/1535/5621/5999/59285/7349/56302/817/84959/3783/7779/8573/93589/80036/8787/3708/6271/58515/4644/5138/581/54836/123041/3603/2859/801/778/84502/116444/825/196541/9722
BP	GO:0019932	second-messenger-mediated signaling	343	0.353872	1.4167	0.00361011	0.00361011	0.023534	2347	tags=22%	list=14%	signal=19%	5745/5144/4842/3747/3579/54209/2185/1813/100/9001/2905/57561/133/9368/163688/9289/1907/2633/2696/108/54331/7535/7852/23576/1827/5621/389692/7349/817/2774/566/27445/8527/3708/8811/2770/58515/4644/5578/6662/7137/23295/5138/333/51554/801/4880/84502/5997/112609/9722/576/10725/79041/3084/3651/152/11214/5744/55366/107/5739/2903/5530/79625/5734/112/3627/6262/8844/2782/5573/2849/10672
BP	GO:0061138	morphogenesis of a branching epithelium	169	0.353869	1.32675	0.0397351	0.0397351	0.08806	1410	tags=15%	list=8%	signal=14%	2668/2247/5228/4488/2294/1435/284217/133/9231/2022/59277/3169/1969/8829/3371/780/10512/4851/1512/3975/10481/10413/56998/6662/10736/2637
BP	GO:0001649	osteoblast differentiation	195	0.353064	1.34519	0.026178	0.026178	0.067394	1616	tags=14%	list=10%	signal=13%	5745/4745/1462/3398/43/3400/4488/3399/64093/10140/1969/3371/1291/7480/6096/51564/4851/182/56998/3491/657/10457/8321/4880/8994/3481/4077
CC	GO:0015629	actin cytoskeleton	469	0.353044	1.45064	0.00232288	0.00232288	0.0208987	2409	tags=22%	list=14%	signal=19%	4645/10602/3983/83715/342184/25861/8522/27295/84448/9001/4638/58480/10580/301/9368/140469/800/8850/9531/6622/7125/8436/90427/4646/2633/6711/144347/124590/27147/126432/79026/2934/9644/84952/23237/1535/100533183/9050/10297/4919/7134/822/55930/794/4634/4649/10518/9172/5880/11275/22998/8573/7402/4644/7137/88/3728/4430/8476/4636/11113/57619/11346/79778/56928/11034/342527/87/23499/29767/79834/119/59/23…
CC	GO:0030658	transport vesicle membrane	186	0.353036	1.33365	0.0279255	0.0279255	0.0704318	3680	tags=35%	list=22%	signal=28%	1813/1363/1174/112476/6622/55754/23208/388662/4135/9900/2890/200734/3382/9899/3133/634/3119/3708/1212/55530/94121/8675/7039/127833/594855/6854/22987/567/6861/116841/598/966/8906/6449/273/23312/54812/5865/160/9143/23025/23546/10590/23673/192683/23176/10427/10228/6645/6456/8448/255057/51128/6853/5867/5861/29106/525/6811/4900/3107/10483/120892/5802/808/5864
BP	GO:0070661	leukocyte proliferation	220	0.352455	1.35446	0.0169713	0.0169713	0.0532974	1694	tags=13%	list=10%	signal=12%	3635/1026/4254/8744/654346/54209/100/1435/301/2322/9231/3280/10451/7535/5621/51043/3133/5880/29126/58515/4179/3965/581/1947/10457/973/3481/7305/23228
BP	GO:0042063	gliogenesis	255	0.352003	1.36918	0.00895141	0.00895141	0.0349296	2255	tags=21%	list=14%	signal=18%	3398/5803/3400/163175/54209/2185/1435/4035/301/9639/1746/3280/3976/9289/2016/2043/5270/1938/28514/2934/7852/26022/7431/9572/7448/4919/79152/566/4851/84630/23380/7161/6662/25825/5453/3913/6774/2817/2119/4665/7074/1464/3084/4036/118738/89927/653464/22933/4049/6663/25777/5728/664
BP	GO:0071214	cellular response to abiotic stimulus	302	0.35179	1.39681	0.00492005	0.00492005	0.0269847	3081	tags=25%	list=18%	signal=20%	1026/4193/5145/1643/1647/5295/4638/1258/6295/9531/7132/8795/2022/5158/5064/90427/7508/5724/6247/84230/5429/1535/5475/6794/624/5934/94241/2978/4790/10413/122622/388/8531/2779/6662/2729/5138/581/6326/801/27347/9990/825/54407/598/4734/472/23746/1410/572/5734/5728/664/2782/51499/5111/1265/677/6011/7442/2767/440275/8091/2805/8111/144715/6422/83695/51719/23514/4214/3364/1277/10635
BP	GO:0104004	cellular response to environmental stimulus	302	0.35179	1.39681	0.00492005	0.00492005	0.0269847	3081	tags=25%	list=18%	signal=20%	1026/4193/5145/1643/1647/5295/4638/1258/6295/9531/7132/8795/2022/5158/5064/90427/7508/5724/6247/84230/5429/1535/5475/6794/624/5934/94241/2978/4790/10413/122622/388/8531/2779/6662/2729/5138/581/6326/801/27347/9990/825/54407/598/4734/472/23746/1410/572/5734/5728/664/2782/51499/5111/1265/677/6011/7442/2767/440275/8091/2805/8111/144715/6422/83695/51719/23514/4214/3364/1277/10635
CC	GO:0016323	basolateral plasma membrane	194	0.351544	1.33792	0.025	0.025	0.0652656	2026	tags=19%	list=12%	signal=16%	5745/760/3747/8825/4035/286/3761/301/143162/5064/9376/134/3248/30061/127700/26504/1364/10392/634/8573/23705/7039/83481/85409/200958/23428/27347/9990/26119/3675/196500/9057/4642/10599/302/117247
BP	GO:0060326	cell chemotaxis	211	0.350844	1.34945	0.0259403	0.0259403	0.067092	2198	tags=16%	list=13%	signal=14%	2247/5144/6359/5228/3579/2185/5800/1435/301/2621/5365/10451/1907/1969/8829/1839/23396/7852/727/566/4851/5880/1843/3965/3603/51554/27347/7074/8729/5054/51157/7409/9564/3627
BP	GO:0001505	regulation of neurotransmitter levels	310	0.350115	1.39159	0.002457	0.002457	0.0208987	2280	tags=20%	list=14%	signal=18%	2668/43/4842/6507/6623/1136/8825/2185/1813/1268/1373/776/112476/9378/6622/6616/23208/9314/9900/23396/63908/10814/8497/114088/23576/5999/2055/3749/6511/6812/8867/27445/1644/7779/8573/127833/23621/594855/6854/51760/18/5413/6861/121278/6512/5997/116841/9722/2643/1815/54/6529/3643/107/140885/2903/2901/157739/8570/84446/815/5865
BP	GO:0009896	positive regulation of catabolic process	389	0.349731	1.41459	0.0023753	0.0023753	0.0208987	2504	tags=21%	list=15%	signal=19%	10769/4193/26353/54209/2185/154214/4035/2308/27244/2103/9531/6622/10140/143686/134/255488/55294/10346/7832/10133/10297/1263/54832/6794/5209/10392/94241/440730/22954/10221/79156/122809/4780/6662/2729/26263/581/127544/85409/22849/4343/255738/23677/55212/83667/5347/1374/4905/5305/93974/5601/4734/4036/9567/51343/203228/3643/56829/91304/472/336/1453/572/207063/22933/25782/8570/6449/5728/664/29997/2605…
MF	GO:0048018	receptor ligand activity	319	0.34926	1.39331	0.0060241	0.0060241	0.0291206	1742	tags=15%	list=10%	signal=13%	9518/2668/8614/2247/4254/6359/5228/7031/8744/7483/338811/64388/1435/133/2621/3976/94027/1907/23768/7425/1839/1946/2922/2520/5020/10512/7480/727/56034/4909/7349/1114/182/10447/5173/7039/5623/10457/3603/258/10637/4880/116173/3481/80326/8190/200081
BP	GO:0007266	Rho protein signal transduction	185	0.349157	1.31773	0.0373333	0.0373333	0.0848115	1923	tags=21%	list=12%	signal=19%	10602/50650/58480/2059/9639/9289/10451/7410/8829/23101/389/5880/9411/143872/55701/221178/388/89846/25791/84033/50649/390/57493/50618/23229/26230/55160/2859/23221/393/57480/4804/64787/3675/7074/157285/8874/23370/11214
BP	GO:0050803	regulation of synapse structure or activity	194	0.348566	1.32659	0.0302632	0.0302632	0.0738194	1957	tags=21%	list=12%	signal=18%	2823/3587/1813/58504/5800/9378/9231/114798/4897/6622/816/2043/23768/869/1946/26045/5020/23237/64084/5621/65981/25791/7846/441381/26052/9148/7058/2049/55638/57549/8321/3556/2119/26050/7074/576/4734/26037/6678/4038
BP	GO:0043406	positive regulation of MAP kinase activity	234	0.348024	1.3431	0.0181818	0.0181818	0.0559888	2103	tags=16%	list=13%	signal=14%	9518/2247/1848/4254/5149/4616/2185/1647/2785/2322/2043/134/257397/7852/8322/727/56034/1326/5979/10392/7316/7039/7161/128239/4293/200958/27347/152110/7074/1815/1464/3084/11214/57551/25759/3643/5605/5154
BP	GO:0040013	negative regulation of locomotion	270	0.348005	1.36311	0.0100883	0.0100883	0.0372376	2345	tags=22%	list=14%	signal=19%	23671/2247/347/1813/100/5800/9901/57561/4035/2192/9368/9231/5365/9289/9314/114757/2022/104/134/8829/138429/9863/10512/727/94241/84978/4851/11117/22998/28984/1843/182/10221/388/10076/10891/23380/4780/54328/3728/657/83481/647135/393/6774/8434/5912/3084/5054/89927/56999/1845/11057/5734/653464/10509/5728/27342/201163
BP	GO:0015672	monovalent inorganic cation transport	442	0.347117	1.42101	0.00232558	0.00232558	0.0208987	2047	tags=18%	list=12%	signal=16%	6330/26266/3792/53826/4842/3747/6507/54209/3775/2185/1813/1183/6560/489/3737/284525/3761/131096/776/9368/487/9058/5349/6616/2273/53822/5270/134/6446/6528/534/6337/2745/9498/53827/5621/7352/26504/5999/130497/65266/817/3749/3738/30819/3783/7402/8811/84286/6526/88/535/6331/155066/6565/123041/6326/523/255738/27347/9990/170850/3778/113235/3768/9722/8514/54407/343450/10142/4905/3249/1815/79041/4734/105…
CC	GO:1990351	transporter complex	289	0.346946	1.37076	0.00744417	0.00744417	0.0310797	1718	tags=17%	list=10%	signal=15%	6330/5144/4842/3747/1136/3775/2185/22941/2905/59284/3737/2059/55367/3761/776/1258/487/55799/6616/57828/2570/2743/2890/26047/6337/55013/785/84230/2900/126129/59285/3749/1364/3738/30819/3783/93589/285175/6331/6326/801/778/116444/170850/134957/3778/9722/8514
BP	GO:0001525	angiogenesis	429	0.346785	1.41615	0.00232288	0.00232288	0.0208987	3018	tags=25%	list=18%	signal=21%	10769/2247/5228/3579/347/3685/2185/58504/6303/3725/4240/133/301/80781/4897/9289/3339/10451/9314/2022/7410/7127/81575/51421/1969/8829/28514/55294/144455/57125/23670/7852/10553/23576/51564/58495/4851/1512/11117/10481/634/688/28984/6271/182/388/2624/718/4780/5578/3516/3491/3728/9421/10457/7058/2637/2049/4804/6774/154810/8434/9990/3397/576/219699/93974/1464/3716/6678/5054/1948/302/6019/56999/5154/796…
MF	GO:0003779	actin binding	401	0.346665	1.40724	0.00352526	0.00352526	0.0235028	1939	tags=19%	list=12%	signal=17%	4645/3983/83715/342184/8522/27295/161176/84448/84665/4638/10580/2059/140469/800/6275/6622/22989/816/7125/4646/2633/6711/23345/1938/57662/23136/2934/7852/53827/4131/9050/7134/822/55930/4634/4649/9172/11275/22998/634/142678/51088/7402/122622/51361/4644/7137/88/4430/114793/57619/120/11346/79778/11034/87/23499/29767/22921/64787/3778/119/23242/3636/11013/4607/11078/57553/644150/7145/4642/51332/84193/2…
BP	GO:0060249	anatomical structure homeostasis	392	0.346017	1.40028	0.00355872	0.00355872	0.0235028	3057	tags=23%	list=18%	signal=19%	5745/3635/760/5166/7031/24/25861/2185/167691/4753/1268/201516/492/26154/1435/776/1258/3988/2103/221395/9531/134/5570/124590/115861/6794/582/2055/84959/794/10518/4851/1512/5880/10413/22954/2624/5578/6662/29123/4751/128338/554313/548593/581/567/29887/57482/27347/5950/825/7301/171392/55812/5925/5889/54/57551/7515/472/23746/92211/25913/26058/8658/3300/5111/51548/585/9657/653269/10000/9256/10590/10039…
BP	GO:0060627	regulation of vesicle-mediated transport	481	0.345819	1.42092	0.0023175	0.0023175	0.0208987	3194	tags=29%	list=19%	signal=24%	6382/146395/10461/54209/3685/2294/1813/9001/1268/6457/4035/4240/776/301/112476/9378/85439/10347/2621/6622/23208/9892/5724/8829/63908/6386/28514/10814/26045/9863/23237/114088/1535/6813/7448/566/6812/4851/27445/5880/634/8573/22876/2624/718/9094/94121/127833/23621/594855/26052/5414/3965/88/51760/5337/567/5413/22848/6861/929/50632/255738/163882/134957/26119/9847/57126/4905/1815/5873/7036/5054/1948/30…
BP	GO:0009266	response to temperature stimulus	219	0.345288	1.32797	0.0261097	0.0261097	0.0673736	1230	tags=11%	list=7%	signal=10%	3490/1026/4842/26353/51278/2353/2308/133/4023/9531/816/27344/134/7425/7852/7352/817/94241/2766/80036/3310/8531/10891/2729
BP	GO:0150063	visual system development	324	0.345086	1.37591	0.0060241	0.0060241	0.0291206	2127	tags=18%	list=13%	signal=16%	10002/2823/57822/43/4901/10461/5145/6094/220202/7483/23424/3725/284217/64093/1746/5915/22989/4081/9314/5158/1969/8829/121643/6247/28514/51761/220/8322/7431/4810/2055/1289/6096/5979/9172/3975/182/718/2779/6662/130916/1028/581/6240/3913/6774/5950/55212/4814/56853/23287/51343/1415/1412/1410/4867/631
BP	GO:0001101	response to acid chemical	299	0.344586	1.36713	0.00859951	0.00859951	0.0339209	2842	tags=25%	list=17%	signal=21%	3490/1036/5166/2185/7483/1373/3399/2308/27244/4023/80781/5915/9536/143686/9314/2743/5724/3371/2696/1938/340485/2934/5020/352954/54331/2730/1291/1535/8322/7480/56034/6096/130497/1032/5979/1512/15/10413/1843/10891/80315/6662/2729/9148/58528/22849/7298/3856/5950/23677/83667/1374/1196/598/3651/6678/472/572/5734/112/2782/824/5111/1027/197131/2706/5563/84861/27/948/2731/7475/1728/2534/89780/6422
BP	GO:0051271	negative regulation of cellular component movement	272	0.344435	1.35121	0.0113208	0.0113208	0.0411064	2375	tags=22%	list=14%	signal=19%	23671/2247/347/1813/100/5800/9901/4035/2192/9368/9231/5365/9289/9314/114757/2022/104/134/8829/138429/9863/10512/727/94241/84978/4851/11117/22998/28984/1843/182/10221/388/10076/10891/23380/4780/54328/3728/657/83481/647135/87/393/6774/8434/5912/3084/5054/89927/56999/1845/11057/5734/653464/10509/5728/27342/201163/1027
BP	GO:1902115	regulation of organelle assembly	181	0.344384	1.29432	0.0469169	0.0469169	0.0968518	4158	tags=35%	list=25%	signal=26%	10769/9638/6382/9001/9378/8850/869/6386/26045/2934/126731/51364/9738/153241/51626/3556/4926/10806/5347/22873/6491/5305/90410/5601/11214/203228/25782/6385/85459/55755/585/200576/5563/57787/5899/4478/8897/3936/9696/23329/57489/10615/55835/3064/23019/1778/120892/5802/23224/65018/49856/140775/51657/7124/8396/2909/56890/80199/4134/11273/79598/8678/128866
BP	GO:0010038	response to metal ion	309	0.344263	1.3663	0.00740741	0.00740741	0.0310425	2782	tags=24%	list=17%	signal=20%	140576/760/3398/6382/4193/3747/7031/2185/1813/1373/2353/3725/6620/6622/9536/23208/2696/2934/30061/5621/7134/817/30819/2978/7779/15/1843/26149/10891/653361/127833/2729/23621/10628/51760/6331/18/567/6861/84557/929/121278/801/3778/825/5601/7036/3651/4734/6678/6529/322/107/1261/572/5530/58/6262/5728/664/57586/6786/5111/1027/540/5563/1800/8437/4205/682/55503/2805/3552/1728
BP	GO:0060562	epithelial tube morphogenesis	301	0.343916	1.36393	0.00864198	0.00864198	0.0339209	2756	tags=24%	list=17%	signal=20%	2668/2247/57822/5228/342184/3579/4488/2294/1435/284217/133/9231/3280/2022/23654/2043/3169/1969/8829/3371/780/121643/28514/7852/130497/65266/83605/5979/26005/58495/4851/1512/3975/10413/388/56998/317/57167/6662/3516/8323/9421/10736/2637/57619/8321/2119/55212/9585/23242/6491/4036/1948/55366/4824/26249/3627/6262/5613/54806/10672/6385/51548/585/4323/9423/2297/64412/10765/5420/10427/7475
CC	GO:0031012	extracellular matrix	416	0.34381	1.40151	0.00233918	0.00233918	0.0208987	1692	tags=15%	list=10%	signal=14%	9518/10085/3490/1462/3909/43/5803/102724770/4811/2006/1294/114794/2192/4240/284217/1308/64093/301/129080/80781/6275/9672/3339/6277/59277/23768/4052/5270/1509/869/1946/3371/1291/51435/307/7448/1289/7837/143282/346007/1514/1512/11117/8573/79875/9806/441381/3491/3965/462/340267/4684/121227/7058/10516/81035/3913/333/50509/3915/2817/2162/439921
BP	GO:0001654	eye development	321	0.343622	1.36874	0.00604595	0.00604595	0.0291206	2127	tags=17%	list=13%	signal=16%	10002/2823/57822/43/4901/10461/5145/6094/220202/7483/23424/3725/284217/64093/1746/5915/22989/4081/9314/5158/1969/8829/121643/6247/28514/51761/220/8322/7431/4810/2055/1289/6096/5979/9172/3975/182/2779/6662/130916/1028/581/6240/3913/6774/5950/55212/4814/56853/23287/51343/1415/1412/1410/4867/631
BP	GO:0010817	regulation of hormone levels	430	0.34355	1.4028	0.0034965	0.0034965	0.0235028	2180	tags=18%	list=13%	signal=16%	8614/3293/43/10874/9249/3747/1813/10202/1268/2232/50700/1363/4035/133/776/301/3976/6616/1428/3169/27344/134/6567/7425/6528/1946/2696/2922/220/54884/8322/389692/9572/7349/3382/27284/27445/4790/406/15/5947/3708/10891/5126/94121/4644/5578/594855/23178/151056/25825/18/438/55638/5950/1374/7074/399979/3249/64577/51171/7036/3651/152/9854/51092/4824/3799/3745/117247/10858/29085/572/10159/5530/9159/53630
MF	GO:0030546	signaling receptor activator activity	324	0.342839	1.36695	0.0060241	0.0060241	0.0291206	1742	tags=15%	list=10%	signal=13%	9518/2668/8614/2247/4254/6359/5228/7031/8744/7483/338811/64388/1435/133/2621/3976/94027/1907/23768/7425/1839/1946/2922/2520/5020/10512/7480/727/56034/4909/7349/1114/182/10447/5173/7039/5623/10457/3603/258/10637/4880/116173/3481/80326/8190/200081
BP	GO:0034765	regulation of ion transmembrane transport	409	0.342482	1.39326	0.00352526	0.00352526	0.0235028	1718	tags=18%	list=10%	signal=16%	6330/3792/53826/2669/146395/5144/4842/3747/54209/2185/22941/1813/6236/9001/59284/3737/3761/131096/776/9368/487/6622/55799/5349/2273/53822/2890/5724/2745/79026/785/23237/53827/1535/5621/5999/59285/130497/65266/817/84959/3749/3738/4747/30819/7779/93589/8787/7402/6271/8811/10891/4644/88/581/6331/23479/6326/2859/801/778/84502/255738/27347/170850/3778/825/196541/5997/3768/9722/8514
BP	GO:0062197	cellular response to chemical stress	301	0.342353	1.35773	0.00864198	0.00864198	0.0339209	3811	tags=29%	list=23%	signal=23%	132864/4193/3747/5625/10202/6778/4638/2353/3725/2308/301/6622/9314/253827/55294/84230/1649/1535/624/94241/406/135112/388/8531/10891/653361/4780/10516/8321/6326/84557/27347/22921/9990/825/2119/83667/2878/2643/5660/5601/140809/140885/51157/472/572/22933/664/4217/5829/7296/5111/2706/5563/677/1800/5034/948/558/1728/2534/51719/2876/10494/4688/9361/983/2882/55074/5052/8996/59338/79085/5074/355/6188/371…
BP	GO:0050714	positive regulation of protein secretion	205	0.341569	1.31095	0.0336352	0.0336352	0.0792693	3066	tags=23%	list=18%	signal=19%	43/10874/654346/54209/1813/4035/4023/6711/2696/9619/727/3133/3783/3098/28984/23705/29126/94121/58515/3965/965/18/55638/929/3556/5950/3651/9854/322/3799/29085/572/5734/55612/112744/8660/26191/64109/192683/135/3552/5590/6850/65220/375/3458/3566
BP	GO:0048880	sensory system development	329	0.341522	1.35935	0.00609013	0.00609013	0.0291369	2127	tags=17%	list=13%	signal=15%	10002/2823/57822/43/4901/10461/5145/6094/220202/7483/23424/3725/284217/64093/1746/5915/22989/4081/9314/5158/1969/8829/121643/6247/28514/51761/220/8322/7431/4810/2055/1289/6096/5979/9172/3975/182/718/2779/6662/130916/1028/581/6240/3913/6774/5950/55212/4814/56853/23287/51343/1415/1412/1410/4867/631
MF	GO:0017016	Ras GTPase binding	409	0.341518	1.38934	0.00470035	0.00470035	0.0260679	2325	tags=20%	list=14%	signal=18%	81846/84958/4645/10602/54843/50650/1795/128344/9901/9467/2059/85442/9639/23179/10451/7410/10811/83593/6764/27147/85377/10133/84552/94120/84220/23101/414918/141/55701/221178/8531/89846/25791/94121/84033/4644/23380/50649/128239/50618/149371/114793/11127/374403/23229/647135/26230/79778/55160/6305/393/57480/4804/64787/134957/23677/29881/1102/23158/7074/8874/4905/11078/90410/57553/9853/23370/11214/575…
BP	GO:0090257	regulation of muscle system process	208	0.341278	1.30827	0.0379085	0.0379085	0.0855425	1924	tags=20%	list=12%	signal=18%	10874/5144/4842/1136/100/2308/487/7132/816/7125/9314/1907/134/5724/5020/5999/7349/7134/817/53632/4634/4851/143872/7402/4000/10891/5578/7137/3728/6331/4636/18/801/3778/5997/9722/4607/10142/79041/152/84193
MF	GO:0005216	ion channel activity	370	0.341004	1.37227	0.0059453	0.0059453	0.0291206	2071	tags=17%	list=12%	signal=15%	6330/2823/55283/3747/1136/3685/3775/2185/1183/1268/2905/59284/3737/55367/3761/131096/776/1258/2621/55799/5349/6616/2570/2743/93129/2890/6337/785/84230/2900/59285/56302/3749/1364/3738/30819/3783/93589/80036/3708/84286/121601/285175/5138/6331/123041/6326/778/84502/79905/116444/170850/3778/3768/8514/343450/3249/79041/302/3745/3781/1261/2903/2901
BP	GO:0007411	axon guidance	262	0.340959	1.33171	0.0151515	0.0151515	0.0495307	1492	tags=18%	list=9%	signal=17%	2668/9638/84665/5295/5800/6586/26999/4035/284217/374946/9378/4897/5365/59352/23654/2674/2043/59277/23768/1969/8829/323/6711/3800/1946/2115/7852/10512/1808/5362/214/5979/3798/5880/3975/5364/5578/1947/4684/5623/64221/2637/2049/11127/57549/8633/3913
BP	GO:0046578	regulation of Ras protein signal transduction	220	0.340819	1.30974	0.0326371	0.0326371	0.0777388	3146	tags=27%	list=19%	signal=22%	4254/50650/1435/2059/9639/9289/4853/10451/7410/8829/23362/23101/4851/440730/143872/55701/81848/221178/89846/25791/84033/50649/57493/50618/23229/26230/55160/2859/57480/9266/64787/3675/7074/157285/8874/3084/23370/11214/8729/8878/7409/253980/27342/201163/440073/8660/8437/64283/27/9912/4650/613/84249/4983/3707/9855/19/10252/5924
BP	GO:0051272	positive regulation of cellular component movement	465	0.340808	1.40143	0.00230681	0.00230681	0.0208987	2700	tags=21%	list=16%	signal=18%	10769/9638/2247/4193/4254/5228/3579/54209/3685/2294/2185/5295/4638/3725/1435/4035/301/286077/80781/2621/4133/487/378938/59352/1907/5724/8829/1839/6386/7852/10512/22902/56034/7448/5979/389/284076/51564/79791/4851/1512/5880/22954/388/2624/29126/58515/9806/8174/4780/5578/6662/3491/3965/80139/10457/7803/6774/27347/154810/9722/9585/3675/7074/7499/8874/8518/6678/5054/3643/80128/51157/472/29085/5154/553…
BP	GO:0032943	mononuclear cell proliferation	203	0.340601	1.30637	0.0363636	0.0363636	0.0837518	1694	tags=13%	list=10%	signal=12%	3635/1026/8744/654346/100/1435/301/2322/9231/3280/10451/7535/5621/51043/3133/5880/29126/58515/4179/3965/581/1947/10457/973/3481/7305/23228
BP	GO:0010001	glial cell differentiation	196	0.340203	1.29621	0.0433071	0.0433071	0.0926306	1704	tags=16%	list=10%	signal=15%	3398/5803/3400/163175/54209/4035/9639/1746/3280/3976/2016/2043/5270/28514/2934/7852/26022/7431/9572/7448/4919/79152/4851/84630/7161/6662/25825/5453/3913/6774/2817/4665
BP	GO:0061564	axon development	483	0.340095	1.3983	0.00347222	0.00347222	0.0235028	2024	tags=20%	list=12%	signal=18%	2668/3792/9638/5803/347/56963/1813/84665/5295/1268/5800/6586/26999/3725/4035/284217/374946/9378/114798/4897/5365/4133/59352/9314/6277/23654/2674/2043/59277/4135/23768/104/1969/8829/323/6711/3800/1946/3371/780/51761/23111/2115/7852/4131/10512/1808/5362/6794/22902/343472/214/4744/5979/3798/4747/6812/9201/4851/5880/3975/22954/5364/22876/5578/1947/4684/5623/64221/2637/2049/11127/57549/23105/8633/3913…
BP	GO:0050878	regulation of body fluid levels	417	0.34005	1.38618	0.00351288	0.00351288	0.0235028	2932	tags=24%	list=18%	signal=21%	1036/4645/57822/10461/2153/54843/2810/1056/1813/100/5295/5800/26154/10544/2192/133/2621/10451/7410/5270/134/780/6337/340205/653604/108/5020/54331/8529/1535/7448/79152/7349/51043/65266/56302/84959/1364/6812/3783/634/8527/3708/25946/1606/2624/1608/4780/5578/462/9148/8323/57493/10362/18/27347/2162/242/7301/9630/57126/5889/5912/4097/5873/23468/966/152/5054/302/107/139818/7409/5154/5328/112/160851/278…
BP	GO:0097485	neuron projection guidance	263	0.339603	1.32695	0.0151515	0.0151515	0.0495307	1492	tags=18%	list=9%	signal=17%	2668/9638/84665/5295/5800/6586/26999/4035/284217/374946/9378/4897/5365/59352/23654/2674/2043/59277/23768/1969/8829/323/6711/3800/1946/2115/7852/10512/1808/5362/214/5979/3798/5880/3975/5364/5578/1947/4684/5623/64221/2637/2049/11127/57549/8633/3913
BP	GO:0051098	regulation of binding	345	0.339389	1.3603	0.00719424	0.00719424	0.0304214	2148	tags=18%	list=13%	signal=16%	10769/124857/3398/3400/4488/22924/3399/64388/3725/4035/25805/3280/4133/3976/9314/341405/2043/8829/55294/1649/56155/84444/166/7448/84959/9236/84630/65981/56998/64324/55355/4751/581/9421/146198/567/55118/9618/81620/255738/26119/119/23228/9044/171392/5986/5792/5347/201501/3397/5925/7074/22873/8874/2962/3084/3651/203228/302/4824/8932/5530/22933
BP	GO:0051051	negative regulation of transport	407	0.339282	1.37891	0.00591017	0.00591017	0.0291206	2136	tags=16%	list=13%	signal=15%	3792/2669/10874/4842/347/3685/2294/2185/1813/6236/100/1268/6457/301/112476/9368/10347/2621/9531/6622/3976/7132/23208/2633/5270/134/6386/26045/5020/8529/114088/4131/307/5999/130497/7349/65266/817/4851/4790/7779/634/28984/9094/94121/3965/88/18/23479/2859/801/255738/27347/5997/1815/3084/152/4734/9478/51465/55366/3745/140885/336/1410/5530/5734
BP	GO:0032102	negative regulation of response to external stimulus	287	0.338736	1.33577	0.0124378	0.0124378	0.0440155	2981	tags=24%	list=18%	signal=20%	2247/1026/347/2294/56963/1813/100/5800/9378/7132/9314/2043/10475/5270/134/8829/10512/727/9572/7448/7349/84959/3133/4851/4790/634/8573/1843/10221/22876/23621/3965/83481/18/7301/5925/64838/54/5054/302/4925/140885/5154/1845/79004/5328/5734/22933/55870/10509/54625/5728/79671/27342/1027/585/6223/84166/6347/135/5627/7869/55666/89780/5155/384/114897/613/2876
BP	GO:1903362	regulation of cellular protein catabolic process	235	0.338058	1.3064	0.0323834	0.0323834	0.0772998	2478	tags=18%	list=15%	signal=15%	10769/4745/4193/54209/2185/154214/4035/2043/255488/6386/55294/1263/7480/440730/10221/55270/122809/4780/2729/26263/127544/85409/255738/55212/5347/93974/5601/4036/51465/57589/302/91304/1453/22933/6449/161582/5728/29997/3300/1454/25897/26234
BP	GO:0051222	positive regulation of protein transport	369	0.337666	1.35816	0.00715137	0.00715137	0.0304214	2215	tags=16%	list=13%	signal=14%	43/10874/4193/23255/654346/54209/2810/1813/5295/58480/4035/5366/4023/2621/9531/55754/26229/6711/2696/55294/9619/5621/1263/727/22902/3133/5880/3783/3098/28984/22994/23705/27113/29126/94121/58515/7161/3965/3728/965/18/55638/79778/929/3556/5950/163882/9847/9585/3651/9854/322/5108/3799/3745/29085/572/5734/55612/112744
BP	GO:0009914	hormone transport	264	0.336552	1.31614	0.0188917	0.0188917	0.0572263	2122	tags=19%	list=13%	signal=16%	10874/3747/1813/1268/1363/4035/133/776/301/3976/6616/1428/134/6567/7425/1946/2696/2922/8322/389692/9572/7349/3382/27445/406/3708/94121/4644/5578/594855/23178/18/55638/5950/1374/7074/399979/7036/3651/152/9854/51092/4824/3799/3745/117247/29085/572/5530
BP	GO:0009636	response to toxic substance	446	0.336445	1.37848	0.00348837	0.00348837	0.0235028	2830	tags=23%	list=17%	signal=20%	1036/1026/6382/4193/3747/1136/3775/2185/1813/10202/100/1268/6778/1373/2353/3725/2059/2308/301/25841/27244/9314/114757/57578/9376/3371/3248/1938/4151/2934/5020/127700/4131/5999/7837/2952/4747/94241/1644/4790/7779/2053/1843/8787/388/10891/4780/10628/581/18/567/6565/10516/84557/7298/8061/929/4880/23428/6774/5950/3778/5997/83667/2878/2643/5660/598/1815/140809/3651/6678/6529/140885/51157/2903/1410/572…
BP	GO:0015849	organic acid transport	277	0.336202	1.32086	0.0175879	0.0175879	0.0546126	2716	tags=25%	list=16%	signal=22%	26266/6507/1813/301/27165/9368/54677/6622/9058/6616/388662/9900/134/6567/8497/5020/8529/84230/5999/126129/2055/130497/624/6511/28965/6812/634/5565/9120/11230/18/80765/6512/23428/27347/123096/113235/5997/54407/32/1374/9057/5660/1815/9123/1836/4036/10599/6529/117247/5321/151473/133418/10499/1468/5825/1636/123/94097/5322/58526/7069/8660/5563/9256/147011/7442/55089/948/135
MF	GO:0022836	gated channel activity	288	0.336123	1.32585	0.0149254	0.0149254	0.0492244	2071	tags=18%	list=12%	signal=16%	6330/55283/3747/1136/3685/3775/2185/1183/1268/2905/59284/3737/3761/131096/776/1258/2621/55799/6616/2570/2743/2890/6337/785/2900/59285/3749/3738/30819/3783/93589/80036/3708/121601/6331/6326/778/84502/79905/116444/170850/3778/3768/8514/343450/3249/302/3745/3781/1261/2903/2901
BP	GO:0072331	signal transduction by p53 class mediator	259	0.335802	1.3091	0.0279898	0.0279898	0.0704318	1526	tags=13%	list=9%	signal=12%	10769/1026/4193/60401/2810/1647/23612/5366/50484/55367/4646/8493/1820/340485/144455/26038/7832/1263/200734/6794/624/5934/53632/94241/8805/28984/5565/25946/7161/4194/581/5564/64782/29965
BP	GO:0046777	protein autophosphorylation	216	0.335236	1.29066	0.0439276	0.0439276	0.0933628	3740	tags=31%	list=22%	signal=24%	2185/3725/2322/816/2022/2043/780/7535/6794/56034/817/2872/8805/6793/84206/9961/4751/23178/1195/4293/10457/2049/127933/22848/801/27347/152110/79834/7301/5912/1196/57551/3643/5605/472/5154/57396/815/814/5613/1636/27/6011/1455/440275/2534/85366/6850/5155/613/7070/10494/2261/7786/4140/9770/84451/805/9149/1859/3717/5170/120892/808/65018/1613
CC	GO:0098797	plasma membrane protein complex	492	0.335132	1.37929	0.00462428	0.00462428	0.0257743	1738	tags=17%	list=10%	signal=16%	6330/5144/4842/3747/1136/8825/3685/3775/2185/22941/2905/59284/3737/10580/4035/2059/3761/2785/2781/776/55799/6616/3339/3140/57828/2743/2890/3693/26047/10811/6386/2786/54331/7535/785/1535/925/10297/2900/6443/727/126129/7448/214/59285/3749/2774/5979/3738/8867/30819/3133/3783/11117/634/9568/3119/93589/7402/1212/653361/2770/2779/5578/1008/3728/6331/657/567/3679/3597/6326/973/778/3588/3856/116444/17085…
BP	GO:0072511	divalent inorganic cation transport	411	0.335027	1.36513	0.00697674	0.00697674	0.0304214	1703	tags=16%	list=10%	signal=15%	8614/2823/2669/2247/5144/55283/4842/3685/2185/5957/1813/6236/9001/492/489/4638/2905/59284/776/2621/487/6622/55799/816/93129/55013/79026/30061/785/7852/1649/1535/5621/26504/5999/59285/7349/56302/817/84959/64116/3783/7779/8573/93589/80036/8787/3708/6271/58515/4644/5138/581/54836/123041/3603/2859/801/778/84502/116444/29985/825/196541/7991/9722
BP	GO:0070838	divalent metal ion transport	406	0.334988	1.36221	0.00705882	0.00705882	0.0304214	1703	tags=16%	list=10%	signal=15%	8614/2823/2669/2247/5144/55283/4842/3685/2185/5957/1813/6236/9001/492/489/4638/2905/59284/776/2621/487/6622/55799/816/93129/55013/79026/785/7852/1649/1535/5621/26504/5999/59285/7349/56302/817/84959/64116/3783/7779/8573/93589/80036/8787/3708/6271/58515/4644/5138/581/54836/123041/3603/2859/801/778/84502/116444/29985/825/196541/7991/9722
BP	GO:0030072	peptide hormone secretion	212	0.334718	1.28572	0.04047	0.04047	0.0893334	2122	tags=19%	list=13%	signal=17%	10874/3747/1813/1268/1363/4035/776/301/6616/7425/1946/2696/2922/389692/9572/7349/3382/27445/406/3708/94121/4644/5578/594855/23178/18/55638/5950/1374/7074/399979/7036/3651/152/9854/51092/3799/3745/29085/572/5530
BP	GO:0045665	negative regulation of neuron differentiation	209	0.334559	1.28505	0.0455729	0.0455729	0.0952935	2258	tags=20%	list=14%	signal=18%	10769/3398/4193/3400/56963/5800/3399/4035/374946/1746/3280/4133/2043/8829/28514/23111/7431/10512/22902/30012/4851/182/22876/25791/7161/6662/26052/567/23105/393/4804/3397/157285/4038/1948/80128/5530/653464/112/10509/5728/23258
BP	GO:0010721	negative regulation of cell development	306	0.334318	1.32834	0.0135301	0.0135301	0.0454293	2258	tags=22%	list=14%	signal=19%	10769/3398/4193/3400/56963/5800/3399/4035/2192/374946/1746/3280/4133/9289/2043/2633/8829/1946/144347/28514/55294/23111/100533183/26022/7431/10512/9572/22902/5999/30012/4851/182/22876/25791/23380/7161/6662/54328/26052/657/567/23105/393/4880/4804/6774/147040/5997/3397/157285/3084/81559/5744/4038/1948/5108/80128/89927/5530/653464/22933/112/6663/10509/5728/23258
BP	GO:0031346	positive regulation of cell projection organization	359	0.334247	1.34361	0.00955795	0.00955795	0.0359952	1842	tags=17%	list=11%	signal=16%	9638/10602/2823/83715/2185/22941/9001/1268/389658/59284/4035/2059/9231/114798/5365/55754/816/23654/2043/5064/4135/8829/1946/257194/51761/7852/9863/8322/4131/5362/6794/22902/5979/51364/4747/79791/9738/440730/5880/153241/65981/5364/56965/4780/127833/26052/9148/51760/50618/8175/8321/22849/23499/4804/64787/5997/3675/23242/7074/22873/8874/22906
BP	GO:2000116	regulation of cysteine-type endopeptidase activity	207	0.333574	1.28021	0.0481771	0.0481771	0.0992694	2330	tags=19%	list=14%	signal=16%	4193/341676/2810/7483/26999/5366/55367/2621/6622/8795/9314/1509/340485/2934/5698/2537/1032/10392/1512/25816/84630/27113/831/317/6195/3491/3965/581/4804/23151/117584/51065/4824/2903/1410/572/331/4217/51499
BP	GO:0045765	regulation of angiogenesis	251	0.333441	1.29491	0.0320102	0.0320102	0.0767376	3018	tags=24%	list=18%	signal=20%	10769/2247/5228/3579/2185/133/301/3339/9314/2022/1969/8829/28514/55294/23670/7852/10553/23576/51564/4851/1512/11117/634/28984/6271/388/2624/718/4780/5578/3728/10457/7058/4804/6774/8434/3397/576/3716/6678/5054/6019/56999/3627/112744/6786/51548/5168/10000/27286/8091/3552/306/6422/51378/3678/1944/6772/9146
BP	GO:0003012	muscle system process	395	0.332527	1.34827	0.00588235	0.00588235	0.0291206	1924	tags=18%	list=12%	signal=16%	6330/2668/55959/10874/5144/4842/1136/1813/100/4638/10580/80852/2308/776/800/487/7132/816/7125/9314/1907/134/3693/5724/1938/4151/51761/2934/5020/7852/1535/7431/5999/7349/7134/2593/624/817/53632/4634/30819/4851/9172/143872/7402/4000/8811/10891/22876/5578/7137/88/3728/6331/4636/18/801/29767/3778/5997/3768/9722/59/7074/4607/10142/79041/152/23336/11214/84193
BP	GO:0051402	neuron apoptotic process	217	0.331971	1.2786	0.0453368	0.0453368	0.0952935	3541	tags=31%	list=21%	signal=25%	2668/5803/2185/3725/4035/6620/374946/6622/104/8829/55294/2730/7832/1649/5621/4909/4747/6812/10891/317/340371/80315/2729/23621/23321/581/11113/6326/54463/4804/255738/7305/7301/5925/219699/598/7516/3745/472/2901/54532/79625/664/128434/2558/6347/3684/558/135/1728/2534/94234/9244/55626/7786/8851/55074/1386/51024/1745/997/16/22861/3717/5170/27023/23017/10018
BP	GO:0042060	wound healing	469	0.331742	1.36311	0.0058072	0.0058072	0.0291206	2944	tags=26%	list=18%	signal=22%	23671/2247/1026/57822/6382/10461/347/2153/4488/5295/4638/10544/2192/301/5493/2621/10451/59352/23208/7410/5270/5738/1839/3371/780/340205/653604/2934/54331/8529/7852/7480/7448/1289/346007/84959/389/6812/4851/634/10413/688/8573/8527/3708/1606/2624/94121/2027/1608/4780/5578/3491/462/8323/10362/83481/18/23499/825/2162/7301/9630/57126/5889/5912/4097/5873/23468/966/3084/4814/152/6678/5054/302/139818/212…
BP	GO:0006936	muscle contraction	314	0.33164	1.31987	0.0121951	0.0121951	0.0434324	1924	tags=18%	list=12%	signal=16%	6330/2668/55959/10874/5144/4842/1136/1813/100/4638/10580/80852/776/800/487/7125/1907/134/3693/5724/1938/4151/51761/5020/7852/7431/7349/7134/2593/624/817/4634/30819/9172/143872/7402/8811/7137/88/3728/6331/4636/18/801/29767/3778/5997/3768/9722/59/4607/10142/79041/152/23336/84193
BP	GO:0034599	cellular response to oxidative stress	257	0.331334	1.29067	0.0306513	0.0306513	0.0744405	3319	tags=23%	list=20%	signal=19%	132864/4193/3747/5625/10202/6778/2353/3725/2308/301/6622/9314/253827/55294/1535/94241/406/135112/388/10891/653361/4780/10516/8321/84557/22921/2119/83667/2878/2643/5660/5601/140809/140885/51157/22933/664/4217/5829/7296/5111/2706/5563/1800/5034/948/558/1728/2534/2876/10494/4688/9361/983/2882/55074/5052/8996/59338/5074
BP	GO:0090287	regulation of cellular response to growth factor stimulus	243	0.330663	1.27793	0.036129	0.036129	0.0836212	1909	tags=15%	list=11%	signal=13%	55959/124857/2247/10468/4488/26999/64388/25805/3280/10140/2022/4052/6386/28514/23111/1030/8322/6794/7448/143282/4851/11117/8573/7316/81848/3516/3491/1028/80139/8321/23089/2817/4926/3675/4734/4036
BP	GO:0002009	morphogenesis of an epithelium	499	0.33024	1.36126	0.00460299	0.00460299	0.0257743	1450	tags=15%	list=9%	signal=14%	2668/760/23671/2247/3909/57822/3872/22881/5228/342184/3579/3400/4488/2294/1435/284217/133/9368/9231/3280/3976/9314/2022/23654/2043/59277/3169/1969/81839/8829/1839/3371/780/121643/28514/57662/5698/220/7852/9863/8322/10512/1289/4919/130497/65266/83605/5979/389/26005/4649/58495/4851/1512/3975/10481/634/10413/182/388/56998/317/54101/57167/6662/3516/3491/8323/9421/10736/2637/57619/8321
BP	GO:0034762	regulation of transmembrane transport	480	0.330068	1.35524	0.00697674	0.00697674	0.0304214	2056	tags=19%	list=12%	signal=17%	6330/3792/760/53826/2669/146395/5144/4842/3747/54209/2185/22941/1813/6236/9001/5295/59284/3737/10580/113451/3761/131096/776/9368/487/6622/55799/5349/2273/53822/2890/5724/2745/79026/785/23237/53827/1535/5621/5999/59285/130497/65266/817/84959/3749/3738/4747/30819/7779/93589/8787/7402/6271/8811/10891/718/4644/4780/88/581/6331/23479/6326/2859/801/778/84502/255738/27347/170850/3778/825/9847/196541/599…
MF	GO:0031267	small GTPase binding	422	0.329786	1.34265	0.00707547	0.00707547	0.0304214	2325	tags=19%	list=14%	signal=17%	81846/84958/4645/10602/54843/50650/1795/128344/9901/9467/2059/85442/9639/23179/10451/7410/10811/83593/6764/27147/85377/10133/84552/94120/84220/23101/414918/141/55701/221178/8531/89846/25791/94121/84033/4644/23380/50649/128239/50618/149371/114793/11127/374403/23229/647135/26230/79778/55160/6305/393/57480/4804/64787/134957/23677/29881/1102/23158/7074/8874/4905/11078/90410/57553/9853/23370/11214/575…
BP	GO:0051962	positive regulation of nervous system development	494	0.329547	1.35574	0.00579374	0.00579374	0.0291206	2403	tags=21%	list=14%	signal=18%	9638/3398/5803/54209/2185/22941/1813/9001/1268/389658/59284/6457/5121/1435/4035/9378/9231/1746/114798/5915/3280/4897/5365/3976/55754/816/23654/2043/4135/3169/23768/5270/8829/869/1946/257194/26045/51761/5020/7852/9863/64084/8322/4131/5362/6794/22902/5979/4747/79791/4851/440730/3975/22954/84630/65981/5364/2624/56965/4780/7161/127833/441381/9148/51760/10362/50618/8175/7058/2049/8321/22849/23499/4804…
BP	GO:0046942	carboxylic acid transport	275	0.32935	1.29413	0.028786	0.028786	0.0719495	2716	tags=25%	list=16%	signal=21%	26266/6507/1813/301/27165/9368/54677/6622/9058/6616/388662/9900/134/6567/8497/5020/8529/84230/5999/126129/2055/624/6511/28965/6812/634/5565/9120/11230/18/80765/6512/23428/123096/113235/5997/54407/32/1374/9057/5660/1815/9123/1836/4036/10599/6529/117247/5321/151473/133418/10499/1468/5825/1636/123/94097/5322/58526/7069/8660/5563/9256/147011/7442/55089/948/135
BP	GO:1904951	positive regulation of establishment of protein localization	385	0.328987	1.33027	0.00951249	0.00951249	0.0359455	2215	tags=16%	list=13%	signal=14%	43/10874/4193/23255/654346/54209/2810/1813/5295/58480/4035/5366/4023/2621/9531/55754/26229/6711/2696/55294/9619/5621/1263/727/22902/3133/5880/3783/3098/28984/22994/23705/153241/27113/29126/94121/58515/7161/3965/3728/965/18/55638/79778/929/3556/5950/163882/9847/9585/3651/9854/322/5108/3799/3745/29085/572/5734/55612/112744
BP	GO:2000147	positive regulation of cell motility	450	0.328314	1.34633	0.00578704	0.00578704	0.0291206	2268	tags=18%	list=14%	signal=16%	10769/2247/4193/4254/5228/3579/54209/3685/2294/2185/5295/4638/3725/1435/4035/301/286077/80781/2621/378938/59352/1907/5724/8829/1839/6386/7852/10512/22902/56034/7448/5979/389/51564/79791/4851/1512/5880/22954/388/2624/29126/58515/9806/8174/4780/5578/6662/3491/3965/80139/10457/7803/6774/27347/154810/9585/3675/7074/7499/8874/8518/6678/5054/3643/51157/472/29085/5154/5530/5328/54566/653464/9564/3627/80…
BP	GO:0007423	sensory organ development	481	0.328182	1.34845	0.00695249	0.00695249	0.0304214	2083	tags=18%	list=13%	signal=16%	10002/2823/57822/43/55283/4901/10461/25861/8825/5145/6094/220202/125488/7483/23424/3725/284217/64093/9368/140469/1746/2103/5915/3280/22989/4081/9314/5158/2043/579/1969/8829/780/124590/121643/6247/28514/51761/220/8322/7431/7480/4810/2055/1289/4919/6096/4909/130497/83605/5979/4851/9172/3975/182/2624/2779/6662/3516/130916/8323/1028/581/10736/121227/79955/2637/6240/3913/6774/5950/80326/55212/5660/324…
BP	GO:0043410	positive regulation of MAPK cascade	447	0.328168	1.34481	0.0058072	0.0058072	0.0291206	2268	tags=17%	list=14%	signal=15%	9518/2247/1848/4254/22881/6359/60401/5149/54209/4616/2185/1813/1647/389658/3725/4035/2785/2322/10347/2621/3976/4853/3487/2043/134/8829/6386/55294/257397/7852/128853/8322/727/56034/1326/5979/10392/4851/344558/7316/388121/64762/653361/7039/5578/7161/3965/128239/4293/10457/200958/9618/27347/3481/152110/242/768211/7074/5660/1815/1464/3084/152/11214/57551/25759/3643/5605/5154/85363/8844/5728/4217/9043
BP	GO:1901653	cellular response to peptide	334	0.327574	1.30764	0.013269	0.013269	0.0448902	2504	tags=18%	list=15%	signal=16%	9518/760/132864/5166/4193/54209/5791/5295/6778/1373/10580/4035/2308/4023/8850/143686/9314/2043/534/108/1535/5621/4131/7431/51043/10392/7071/4790/634/688/4644/4780/2729/54328/23621/88/535/155066/523/4804/255738/6774/3481/9847/3397/9663/3643/107/112/9564/5728/5829/815/5573/6430/140710/2706/8660/26191/677
BP	GO:0042391	regulation of membrane potential	363	0.327569	1.31599	0.0107399	0.0107399	0.039382	2880	tags=24%	list=17%	signal=20%	6330/3747/1136/54209/3775/2185/22941/1813/1268/2905/3737/3725/5366/131096/776/9378/4355/4897/6622/2273/2570/2743/2890/134/869/138429/2745/23111/2730/785/2900/2537/5999/817/6511/30819/79680/3783/2729/88/3728/581/6331/18/6326/2859/124925/3778/55186/9722/343450/10142/93974/598/1815/4734/56853/3799/3745/3781/2903/2901/572/5530/54532/388135/51305/6262/5728/664/57657/665/22953/57369/1832/1135/2558/7442…
BP	GO:0030335	positive regulation of cell migration	435	0.327414	1.33881	0.00583431	0.00583431	0.0291206	2268	tags=18%	list=14%	signal=16%	10769/2247/4193/4254/5228/3579/54209/3685/2294/2185/5295/4638/3725/1435/4035/301/286077/80781/2621/59352/1907/5724/8829/1839/6386/7852/10512/22902/56034/7448/5979/389/51564/79791/4851/1512/5880/22954/388/2624/29126/58515/8174/4780/5578/6662/3491/3965/80139/10457/7803/6774/27347/154810/9585/3675/7074/7499/8874/8518/6678/5054/3643/51157/472/5154/5530/5328/54566/653464/9564/3627/80005/83692/10509/25…
BP	GO:1901652	response to peptide	450	0.327409	1.34262	0.00578704	0.00578704	0.0291206	1778	tags=14%	list=11%	signal=13%	9518/760/1036/132864/5166/8614/4193/7031/54209/5791/5295/6778/1373/10580/4035/2308/133/301/4023/8850/6775/143686/9314/2043/7425/534/108/5020/7832/6773/1535/5621/4131/7352/7431/51043/10392/4747/7071/4851/4790/15/634/688/182/2770/4644/4780/2729/54328/23621/88/535/155066/523/4804/255738/6774/3481/9847/83667/3397/3636/9663
MF	GO:0022804	active transmembrane transporter activity	307	0.327403	1.30007	0.0221948	0.0221948	0.0619298	2468	tags=18%	list=15%	signal=16%	26266/6507/24/1183/6560/492/489/6890/26154/64137/284525/55244/10347/487/9058/388662/9376/23461/6567/6528/534/9498/9619/10349/6511/6891/9120/6526/8034/535/155066/6565/123041/523/6512/9990/55508/54407/10350/9057/23460/9123/1836/10599/6529/10568/117247/151473/389015/1468/5825/10058/55002/79963/540
BP	GO:0071496	cellular response to external stimulus	308	0.327063	1.2985	0.0222222	0.0222222	0.0619298	2842	tags=21%	list=17%	signal=18%	5166/1026/4193/1647/2353/3725/5366/467/2308/27244/4023/2621/9531/7132/8795/143686/2022/8493/3371/352954/1535/1030/166/81631/10518/7071/4790/8805/875/55270/80315/4780/6662/2729/26263/5138/58528/84557/8061/255738/167359/54407/83667/3745/3992/572/53349/5734/664/4217/57407/8658/432/1265/5563/7442/5899/558/440275/83990/2805/90226/2534/8897/6422
MF	GO:0005096	GTPase activator activity	255	0.326694	1.27073	0.0409207	0.0409207	0.0896185	3930	tags=31%	list=24%	signal=24%	58504/6000/9901/3725/6004/257106/57636/10451/8829/126432/23092/57568/5999/84220/116987/79658/4649/9411/143872/141/84144/8787/5364/642517/23380/374403/26230/55803/55160/393/134957/9938/5997/23158/55635/26037/26286/5998/25782/80005/29127/9743/201163/8601/55357/8437/11138/9912/4650/116985/23527/613/7070/4983/23329/57186/79774/5903/10928/116983/23108/51291/9459/4952/23779/414060/394/10483/120892/2310…
BP	GO:0051258	protein polymerization	265	0.325802	1.27452	0.036478	0.036478	0.083842	3818	tags=28%	list=23%	signal=22%	10602/342184/8522/2185/2006/22924/2059/256949/4133/6622/24139/6711/11076/57662/2934/4131/9050/7448/55243/822/4747/84630/120/57482/79778/23221/29767/22921/119/4926/23242/11013/54820/10142/11078/51673/51332/25999/1453/10382/6249/1027/55755/58526/585/2879/9535/23271/375/10109/8851/79585/55835/375189/2039/55971/84501/57731/1859/6188/3717/55845/55761/10426/10677/7283/9463/59341/65018/8936/23580/27338/…
BP	GO:0046879	hormone secretion	258	0.325672	1.26889	0.0408163	0.0408163	0.0895659	2122	tags=18%	list=13%	signal=16%	10874/3747/1813/1268/1363/4035/133/776/301/3976/6616/134/7425/1946/2696/2922/8322/389692/9572/7349/3382/27445/406/3708/94121/4644/5578/594855/23178/18/55638/5950/1374/7074/399979/7036/3651/152/9854/51092/4824/3799/3745/29085/572/5530
CC	GO:0005788	endoplasmic reticulum lumen	269	0.32505	1.27634	0.0299625	0.0299625	0.0732464	1603	tags=14%	list=10%	signal=13%	3490/8614/1462/11098/2153/1294/1435/4240/1308/2322/80781/2621/3487/4052/7425/3371/11173/1291/64374/56034/7448/1289/8974/1114/718/23621/3491/462/340267/567/1471/8824/258/23491/3913/340348/255738/50509/3915
BP	GO:0051047	positive regulation of secretion	341	0.324857	1.30178	0.0131894	0.0131894	0.0448902	2215	tags=17%	list=13%	signal=15%	2668/6382/43/10874/654346/54209/54843/1813/1268/4035/776/4023/6622/134/5724/6711/6386/2696/2922/5020/8529/9619/1535/727/7349/6812/3133/3783/3098/28984/23705/2624/29126/94121/58515/3965/965/18/55638/929/3556/5950/134957/242/57126/5873/7036/3651/9854/6529/322/4824/3799/3745/29085/572/5734/55612/112744
BP	GO:0007409	axonogenesis	443	0.324822	1.33066	0.00580046	0.00580046	0.0291206	2024	tags=20%	list=12%	signal=18%	2668/3792/9638/5803/1813/84665/5295/5800/6586/26999/4035/284217/374946/9378/114798/4897/5365/4133/59352/6277/23654/2674/2043/59277/4135/23768/104/1969/8829/323/6711/3800/1946/51761/23111/2115/7852/4131/10512/1808/5362/6794/22902/343472/214/4744/5979/3798/4747/6812/9201/4851/5880/3975/5364/5578/1947/4684/5623/64221/2637/2049/11127/57549/23105/8633/3913/393/23499/4804/2817/26050/23242/7074/53358/21…
BP	GO:0002683	negative regulation of immune system process	341	0.324776	1.30146	0.0131894	0.0131894	0.0448902	3079	tags=24%	list=18%	signal=20%	3635/3398/4254/3579/10461/347/654346/2294/2185/1813/100/5295/1268/6778/301/9231/221395/3280/10475/2633/134/28514/55294/5621/727/9572/51043/84959/1831/3133/4851/11117/634/1843/10221/2624/29126/4780/6662/3965/554313/10457/7305/7301/23228/171392/966/472/336/29085/1845/79004/5734/54625/79671/5573/27342/6385/26191/6223/677/84166/10039/6347/558/135/8861/55666/6422/384/613/2876/1840/7070/54542/79037/835…
BP	GO:0052548	regulation of endopeptidase activity	315	0.324704	1.29151	0.0158537	0.0158537	0.0515238	2078	tags=17%	list=12%	signal=15%	124857/4193/341676/2810/1294/7483/26999/5366/55367/2621/6622/8795/9314/2043/27344/5270/1509/10406/340485/2934/5698/2537/727/7448/1032/10392/1512/25816/84630/27113/6691/718/831/317/6195/9806/3491/3965/462/340267/581/1471/4804/6774/8434/27290/23151/117584/51065/5054/4824/2903/1410/572
BP	GO:0010976	positive regulation of neuron projection development	267	0.324686	1.27166	0.0377358	0.0377358	0.0853256	1768	tags=18%	list=11%	signal=16%	9638/2185/22941/1268/389658/59284/4035/9231/114798/5365/55754/816/23654/2043/4135/8829/1946/257194/51761/7852/9863/8322/4131/5362/6794/22902/5979/4747/79791/440730/65981/5364/56965/4780/127833/9148/51760/50618/8175/8321/22849/23499/4804/5997/3675/23242/7074
BP	GO:0048732	gland development	391	0.324304	1.31206	0.0130641	0.0130641	0.0448902	1884	tags=16%	list=11%	signal=14%	1999/55959/1036/3398/3400/4488/2294/1813/100/6778/1373/3725/1435/284217/205/301/9368/5915/3280/59277/3169/1969/5270/8829/3371/780/55294/144455/220/10512/6794/7448/79152/51043/4851/10481/634/2624/6195/6662/3516/55840/462/9148/1028/581/128239/80139/657/11113/2049/7298/51599/255738/3481/2119/80326/23242/5660/3249/3084/3651
BP	GO:0040017	positive regulation of locomotion	464	0.324227	1.33266	0.00693642	0.00693642	0.0304214	2700	tags=20%	list=16%	signal=18%	10769/2247/4193/4254/5228/3579/54209/3685/2294/2185/5295/4638/3725/1435/4035/301/286077/80781/2621/378938/59352/1907/5724/8829/1839/6386/7852/10512/22902/56034/7448/5979/389/51564/566/79791/4851/1512/5880/22954/388/2624/29126/58515/9806/8174/4780/5578/6662/3491/3965/80139/10457/3603/7803/6774/27347/154810/9585/3675/7074/7499/8874/8518/6678/5054/3643/51157/472/29085/5154/5530/5328/54566/653464/956…
BP	GO:0050768	negative regulation of neurogenesis	267	0.324178	1.26967	0.0415094	0.0415094	0.090552	2258	tags=21%	list=14%	signal=18%	10769/3398/4193/3400/56963/5800/3399/4035/374946/1746/3280/4133/9289/2043/8829/28514/23111/26022/7431/10512/9572/22902/30012/4851/182/22876/25791/23380/7161/6662/54328/26052/657/567/23105/393/4804/6774/147040/3397/157285/3084/81559/4038/1948/5108/80128/89927/5530/653464/22933/112/6663/10509/5728/23258
BP	GO:0010948	negative regulation of cell cycle process	316	0.323962	1.29054	0.0206311	0.0206311	0.0598912	3039	tags=25%	list=18%	signal=21%	10769/1026/4193/2810/1647/55367/8850/3976/2273/9314/1820/55294/144455/5698/146691/7832/56155/1030/1263/123879/1032/23194/5934/79791/28984/1843/25946/317/56241/84936/4751/4194/581/10457/5017/81620/79027/5347/5925/23468/51065/79960/57551/51343/1029/138151/472/84446/8812/5728/29997/5573/51512/51499/26058/8658/5111/1027/80314/55755/677/84861/1063/1031/9232/10459/6347/995/57060/51149/8091/80279/51514/…
BP	GO:0043405	regulation of MAP kinase activity	304	0.323685	1.28519	0.027127	0.027127	0.0693566	2268	tags=18%	list=14%	signal=16%	9518/2247/1848/4254/5149/4616/2185/1647/2785/2322/2043/134/257397/7852/8322/200734/727/56034/5999/1326/1846/5979/10392/80824/1843/7316/11072/81848/10221/7039/7161/128239/4293/200958/27347/152110/5997/171392/7074/1815/1464/3084/11214/5470/57551/1844/25759/3643/5605/5154/1845/5998/8844/4217/9043
MF	GO:0033218	amide binding	284	0.322972	1.27291	0.0362047	0.0362047	0.0836212	2152	tags=18%	list=13%	signal=16%	5745/43/54209/5295/9445/6890/4035/11015/5480/9536/3339/2043/2890/323/2696/30061/5621/8322/414149/30819/3133/3836/3119/1212/8811/5360/23621/4820/25825/1471/7298/929/23428/4804/114928/26119/113235/9452/32/5660/9854/9478/322/3643/25999/26232/2903/1410/5530/9546
BP	GO:0050769	positive regulation of neurogenesis	437	0.322729	1.32049	0.00813953	0.00813953	0.0330905	2183	tags=19%	list=13%	signal=17%	9638/3398/5803/54209/2185/22941/1813/9001/1268/389658/59284/6457/5121/1435/4035/9231/1746/114798/5915/3280/4897/5365/3976/55754/816/23654/2043/4135/3169/5270/8829/1946/257194/51761/7852/9863/8322/4131/5362/6794/22902/5979/4747/79791/4851/440730/22954/84630/65981/5364/2624/56965/4780/7161/127833/9148/51760/10362/50618/8175/8321/22849/23499/4804/147040/2119/5997/9585/3675/23242/7074/22906/152/4036/…
BP	GO:0018108	peptidyl-tyrosine phosphorylation	311	0.322704	1.28094	0.027127	0.027127	0.0693566	3017	tags=24%	list=18%	signal=20%	4254/10461/54209/2185/1795/389658/9467/2322/2621/3280/3976/7132/2043/1969/134/8829/1839/1946/780/55294/7535/5621/56034/7448/4919/5979/84630/22876/9094/653361/122809/7039/9961/1195/9148/2049/6774/3481/79834/7301/5912/1196/10420/1464/3084/3716/4038/3643/5605/5154/57396/2209/54625/1636/5168/4920/2051/27/948/558/80725/2534/89780/1742/6422/5590/3263/6850/5155/9244/51378/3678/7070/3458
BP	GO:0034329	cell junction assembly	372	0.322407	1.29873	0.0166865	0.0166865	0.0532974	2556	tags=24%	list=15%	signal=20%	2823/3909/43/342184/347/2185/22941/1056/1813/5800/10580/4035/1308/9378/9231/114798/4897/6622/143162/50848/23654/23768/1969/8829/869/23396/1946/728798/57662/23136/26045/5020/9863/64084/4131/84552/389/4649/51564/27445/22998/5364/9806/5578/441381/1008/26052/88/3728/57493/80139/7058/2049/8321/79778/87/51599/23499/3556/3915/79834/119/26050/576/8874/10420/7145/3084/4038/1948/421/4867/1845/7122/5728/150…
BP	GO:0018212	peptidyl-tyrosine modification	314	0.322297	1.28269	0.0219512	0.0219512	0.0615927	3017	tags=24%	list=18%	signal=20%	4254/10461/54209/2185/1795/389658/9467/2322/2621/3280/3976/7132/2043/1969/134/8829/1839/1946/780/55294/7535/5621/56034/7448/4919/5979/84630/22876/9094/653361/122809/7039/9961/1195/9148/2049/6774/3481/79834/7301/5912/1196/10420/1464/3084/3716/4038/3643/5605/5154/8460/57396/2209/54625/1636/5168/4920/2051/27/948/558/80725/2534/89780/1742/6422/5590/3263/6850/5155/9244/51378/3678/7070/3458
MF	GO:0015267	channel activity	398	0.322262	1.30763	0.0141343	0.0141343	0.0471736	2071	tags=16%	list=12%	signal=15%	6330/2823/55283/3747/1136/3685/3775/2185/1183/1268/2905/59284/3737/55367/3761/131096/776/1258/2621/55799/5349/6616/2570/2743/93129/2890/6337/785/84230/2900/59285/56302/3749/1364/3738/30819/3783/93589/80036/3708/84286/121601/285175/5138/581/6331/123041/6326/778/84502/79905/116444/170850/3778/3768/8514/343450/3249/79041/302/3745/3781/1261/2903/2901
MF	GO:0022803	passive transmembrane transporter activity	398	0.322262	1.30763	0.0141343	0.0141343	0.0471736	2071	tags=16%	list=12%	signal=15%	6330/2823/55283/3747/1136/3685/3775/2185/1183/1268/2905/59284/3737/55367/3761/131096/776/1258/2621/55799/5349/6616/2570/2743/93129/2890/6337/785/84230/2900/59285/56302/3749/1364/3738/30819/3783/93589/80036/3708/84286/121601/285175/5138/581/6331/123041/6326/778/84502/79905/116444/170850/3778/3768/8514/343450/3249/79041/302/3745/3781/1261/2903/2901
MF	GO:0042578	phosphoric ester hydrolase activity	343	0.320577	1.28341	0.0192539	0.0192539	0.0578519	2819	tags=23%	list=17%	signal=19%	3635/1848/5803/5144/196051/5149/5145/5791/5800/3628/57460/5158/8493/8611/80055/128853/5475/1846/624/51207/84959/5209/8867/80824/2053/9108/130367/1843/11072/10076/22876/5784/23646/56261/84867/5138/5337/251/84812/7803/64077/6305/147699/78986/152926/23228/5792/9663/5723/994/84284/79948/5470/54/1844/5147/493911/29085/3631/1845/5530/5728/2782/5573/1850/257068/5168/200576/26191/5330/56953/5210/85464/84…
BP	GO:0010975	regulation of neuron projection development	472	0.319554	1.31483	0.00807382	0.00807382	0.0329677	2258	tags=20%	list=14%	signal=18%	10769/3792/9638/4193/1136/2185/56963/22941/1268/5800/389658/59284/4035/374946/85442/9231/114798/4897/5365/4133/6616/55754/816/9314/23654/2043/4135/4139/8829/1946/257194/51761/23111/7852/9863/23237/8322/4131/7431/10512/1808/5362/6794/22902/343472/5979/4649/4747/79791/440730/65981/5364/22876/25791/56965/4780/127833/26052/9148/51760/50618/8175/567/2049/8321/22849/23105/124925/4343/393/23499/4804/599…
MF	GO:0030695	GTPase regulator activity	285	0.319423	1.25865	0.0463079	0.0463079	0.096308	3756	tags=29%	list=23%	signal=23%	132864/58504/6000/9901/3725/6004/257106/57636/10451/8829/126432/23092/57568/5999/84220/116987/79658/4649/9411/143872/141/84144/8787/5364/642517/23380/374403/26230/55803/55160/393/134957/9938/23677/5997/23158/83667/55635/26037/5147/26286/140885/5998/25782/80005/29127/9743/201163/8601/55357/8437/11138/9912/4650/116985/23527/613/7070/4983/23329/57186/79774/5903/10928/116983/23108/51291/9459/4952/237…
BP	GO:1903829	positive regulation of cellular protein localization	309	0.318424	1.26375	0.0320988	0.0320988	0.0767847	2078	tags=16%	list=12%	signal=14%	4193/23255/54209/2810/5295/26154/58480/10580/4035/5366/10347/2621/9531/3976/55754/23208/1969/26229/6711/55294/5621/1263/6794/22902/5880/22994/27113/2770/7161/3728/85409/79778/81620/4804/163882/9847/7305/9585/4926/83667/5347/3675/8878/4038/5108/25999/3799/3745/572
BP	GO:0043434	response to peptide hormone	383	0.318388	1.28698	0.0166468	0.0166468	0.0532974	2504	tags=17%	list=15%	signal=15%	9518/760/1036/132864/5166/8614/4193/7031/5791/5295/6778/1373/10580/2308/133/301/4023/8850/6775/143686/7425/534/108/5020/7832/6773/1535/4131/7352/51043/4747/4790/15/634/2770/4644/4780/2729/54328/88/535/155066/523/255738/6774/3481/9847/83667/3636/9663/6678/3643/107/112/9564/6272/5728/5829/815/5573/6430/140710/1027/9852/2706/8660/677
BP	GO:0044782	cilium organization	358	0.317888	1.27847	0.0190476	0.0190476	0.0575422	4429	tags=38%	list=27%	signal=29%	3983/27241/167691/125488/9001/220136/2934/582/22897/26005/51364/9738/4851/22994/63917/153241/7846/154313/84314/51626/4751/9148/89765/6674/11127/29887/55779/26140/347240/9814/54558/79659/28981/10309/9702/55212/10806/5347/22873/54820/10142/27285/90410/54839/11258/5108/22995/1453/10382/4867/4957/150082/161582/150737/152206/79582/374407/54806/1454/55755/585/353116/91978/5990/56683/9657/64284/95681/85…
BP	GO:0035690	cellular response to drug	360	0.317871	1.27743	0.0191159	0.0191159	0.0575924	2883	tags=22%	list=17%	signal=19%	4193/3747/2908/1136/1813/6778/2308/301/9368/2621/9314/5064/5724/1946/340485/108/352954/54331/2730/7852/1535/5621/7431/5999/10392/10518/94241/1644/4790/8787/122622/388/10891/27065/4062/2770/4780/6662/2729/3728/5138/567/84557/50632/196541/9630/3397/5660/1815/79041/4824/107/140885/51157/572/5530/112/6663/6262/5728/664/4217/2782/5111/57657/6688/2706/26191/5563/1800/7442/2767/558/8091/1728/2534/5106/6…
BP	GO:0046394	carboxylic acid biosynthetic process	303	0.317708	1.26098	0.0430504	0.0430504	0.092445	2584	tags=20%	list=16%	signal=17%	1036/26031/5166/1462/240/6507/1373/301/27165/4023/2678/9536/5352/1907/55301/134429/3248/220/9572/79152/2593/53632/79966/4790/634/2053/875/5565/5947/6785/4644/5564/18/79993/242/2687/32/2643/64577/1464/5723/114876/3992/10858/5321/11057/5007/5825/10090/160/5322/58526/57494/633/2879/5563/9885/6342/10327/2686
BP	GO:0016053	organic acid biosynthetic process	304	0.317046	1.25883	0.0406905	0.0406905	0.0895276	2584	tags=20%	list=16%	signal=17%	1036/26031/5166/1462/240/6507/1373/301/27165/4023/2678/9536/5352/1907/55301/134429/3248/220/9572/79152/2593/53632/79966/4790/634/2053/875/5565/5947/6785/4644/5564/18/79993/242/2687/32/2643/64577/1464/5723/114876/3992/10858/5321/11057/5007/5825/10090/160/5322/58526/57494/633/2879/5563/9885/6342/10327/2686
BP	GO:0060271	cilium assembly	342	0.316986	1.26825	0.0241255	0.0241255	0.0641936	4429	tags=39%	list=27%	signal=29%	3983/27241/125488/9001/220136/2934/582/22897/26005/51364/9738/4851/22994/63917/153241/7846/154313/84314/51626/4751/9148/89765/6674/11127/29887/55779/26140/347240/9814/54558/79659/28981/10309/9702/55212/10806/5347/22873/54820/10142/27285/90410/54839/11258/5108/22995/1453/10382/4867/4957/161582/150737/152206/79582/374407/54806/1454/55755/585/353116/91978/5990/56683/9657/64284/95681/85302/57787/7914…
BP	GO:0071900	regulation of protein serine/threonine kinase activity	464	0.316853	1.30235	0.00924855	0.00924855	0.0352944	3154	tags=25%	list=19%	signal=21%	9518/2247/1026/1848/4254/5149/2810/4616/2185/1647/22924/2785/8900/2322/8850/6622/2043/134/5570/55924/257397/7852/1030/8322/200734/727/414194/56034/5999/1326/1846/1032/5979/53632/10392/80824/900/29950/28984/1843/7316/11072/81848/10221/7039/7161/1028/128239/57493/4293/200958/801/27347/3481/152110/10309/5997/171392/83667/5347/5925/7074/1815/1464/51191/3084/11214/5470/57551/1844/25759/1029/3643/5605/…
BP	GO:0043087	regulation of GTPase activity	434	0.316213	1.29328	0.0116279	0.0116279	0.0419484	3771	tags=27%	list=23%	signal=22%	81846/132864/57822/6359/2185/58504/6000/9901/3725/6004/257106/9639/57636/5365/10451/50848/7410/23654/2043/1969/8829/1946/126432/23092/10297/5362/57568/5999/84220/116987/79658/4649/9411/143872/141/84144/8787/5364/642517/89846/25791/23380/128239/2049/374403/26230/55803/55160/6305/393/134957/9938/23677/5997/23158/7074/8874/55635/23161/26037/57589/5147/26286/139818/7409/5998/25782/80005/29127/9743/20…
BP	GO:0032147	activation of protein kinase activity	301	0.315682	1.25196	0.0469136	0.0469136	0.0968518	2035	tags=15%	list=12%	signal=13%	9518/2247/1848/1136/5149/4616/2185/1813/1647/2785/2621/8795/134/1946/108/257397/7852/5621/727/6794/56034/1326/7349/5979/10392/6793/28984/7316/7039/7161/128239/4293/200958/9618/27347/1815/1464/3084/152/57551/25759/3643/107/5605
BP	GO:0070997	neuron death	316	0.315572	1.25712	0.038835	0.038835	0.0866892	3811	tags=32%	list=23%	signal=25%	2668/5803/2185/2353/3725/1435/4035/6620/374946/6622/104/134/8829/55294/2730/7832/1649/5621/4909/7349/4747/6812/135112/10891/317/340371/80315/2729/23621/23321/581/10457/11113/8321/6326/54463/4804/255738/6774/7305/7301/84280/5925/219699/598/7516/1948/3745/91304/472/2901/572/54532/79625/664/4217/824/10570/353116/128434/5966/2558/6347/3684/558/135/1728/2534/89780/23098/1191/94234/9244/3458/23368/5562…
CC	GO:0030133	transport vesicle	352	0.315561	1.2645	0.0289157	0.0289157	0.0719495	3073	tags=26%	list=18%	signal=22%	84958/54843/1813/9001/1363/11015/113451/1174/112476/85439/6622/6616/55754/23208/388662/9892/4135/9900/2890/7425/30061/114088/200734/94120/4909/261729/3382/9899/3133/1644/634/3119/5016/3708/1212/55530/5126/94121/8675/7039/127833/23621/594855/5414/6854/51760/85409/22987/567/5413/6861/547/163882/134957/116841/598/5873/966/8906/2903/51305/6449/273/23312/6272/84446/54812/5865/57586/160/9143/11311/633/…
BP	GO:0010035	response to inorganic substance	472	0.315341	1.2975	0.0126874	0.0126874	0.0444213	3359	tags=26%	list=20%	signal=22%	140576/760/3398/6382/4193/3747/7031/2185/1813/100/6778/1373/2353/3725/6620/2308/301/80781/6622/9536/23208/9314/2696/1938/4151/2934/30061/5621/4131/7352/7134/817/4747/30819/2978/7779/15/1843/26149/388/10891/653361/4780/127833/2729/23621/10628/51760/6331/18/567/10516/6861/84557/8061/929/121278/801/1917/3856/3778/825/2643/5660/5601/7036/3651/4734/6678/6529/322/107/140885/51157/1261/1410/572/5530/58/…
MF	GO:0015077	monovalent inorganic cation transmembrane transporter activity	328	0.315077	1.25587	0.0315534	0.0315534	0.0761336	2071	tags=15%	list=12%	signal=14%	6330/26266/3747/6507/3775/1183/6560/489/3737/284525/3761/131096/487/9058/6616/388662/6528/534/6337/9498/2900/26504/3749/6511/3738/30819/3783/84286/6526/535/6331/155066/6565/123041/6326/523/9990/170850/3778/113235/3768/8514/343450/3249/79041/6529/10568/3745/3781/2901
BP	GO:0051346	negative regulation of hydrolase activity	353	0.314575	1.26178	0.0288115	0.0288115	0.0719495	2117	tags=16%	list=13%	signal=14%	124857/132864/4193/4842/54843/2810/1294/114794/7483/301/6295/2621/5365/4133/6622/50848/9314/27344/5270/81706/57662/10406/2537/727/7448/1032/25816/6691/718/831/2779/6195/9806/7137/462/340267/51400/1471/9814/4804/8434/5018/163882/27290/23677/5997/116729/93974/4642/117584/221692/5054/5147/336/1410/53349
BP	GO:0001558	regulation of cell growth	377	0.313301	1.26452	0.0236967	0.0236967	0.0641936	2646	tags=21%	list=16%	signal=18%	3490/1026/3872/2810/2185/6586/59284/4035/374946/4897/4133/2273/3487/5270/6446/8829/323/1839/1946/780/6386/23136/6595/2786/23111/7852/1535/4131/10512/1808/6794/22902/343472/5999/7349/123879/817/1032/634/22954/27346/65981/6195/127833/55840/51760/50618/10516/23105/393/23499/2137/23677/5997/83667/5925/3249/79960/1029/322/64061/80128/1410/10110/9564/10509/22883/201163/3300/1027/23025/4323/84861/1031/9…
BP	GO:0045860	positive regulation of protein kinase activity	477	0.313242	1.28813	0.0127021	0.0127021	0.0444213	2385	tags=17%	list=14%	signal=15%	9518/2247/1026/1848/4254/1136/5149/4616/2185/1813/1647/1795/22924/389658/1435/2785/2322/2621/6622/8795/2043/134/1946/55294/108/257397/7852/5621/8322/727/6794/414194/56034/1326/7349/5979/10392/566/6793/28984/84630/7316/9094/653361/7039/7161/3491/9148/128239/4293/200958/801/9618/27347/3481/152110/4665/7074/1815/1464/3084/994/152/11214/57551/25759/3643/107/5605/5154/112/2209/8812/4217/9043/1636/5573…
BP	GO:1903532	positive regulation of secretion by cell	322	0.312372	1.24443	0.0410133	0.0410133	0.0896451	2215	tags=16%	list=13%	signal=15%	2668/6382/43/10874/654346/54209/1813/1268/4035/776/4023/6622/5724/6711/6386/2696/2922/5020/9619/727/7349/6812/3133/3783/3098/28984/23705/2624/29126/94121/58515/3965/965/18/55638/929/3556/5950/134957/57126/5873/7036/3651/9854/322/4824/3799/3745/29085/572/5734/55612/112744
BP	GO:1901990	regulation of mitotic cell cycle phase transition	396	0.312184	1.26695	0.0246769	0.0246769	0.0647252	3031	tags=23%	list=18%	signal=20%	10769/1026/3398/4193/2810/1647/55367/301/2273/9314/1820/7508/144455/5698/7832/56155/1030/1263/7480/123879/1032/22897/23194/5934/79791/9738/28984/22994/1843/25946/7846/84936/4751/4194/1028/581/10457/9814/81620/9702/79027/10806/5347/5925/5889/54820/10142/51065/994/79960/57551/51343/1029/11258/5108/138151/10537/22995/472/1453/3161/10382/22933/4957/84446/5728/29997/51512/51499/26058/5111/1027/1454/55…
BP	GO:0045666	positive regulation of neuron differentiation	343	0.311648	1.24766	0.0373045	0.0373045	0.0848115	1768	tags=17%	list=11%	signal=15%	9638/2185/22941/1268/389658/59284/6457/5121/4035/9231/1746/114798/5915/4897/5365/55754/816/23654/2043/4135/3169/8829/1946/257194/51761/7852/9863/8322/4131/5362/6794/22902/5979/4747/79791/440730/22954/65981/5364/2624/56965/4780/127833/9148/51760/10362/50618/8175/8321/22849/23499/4804/147040/2119/5997/3675/23242/7074
CC	GO:0098552	side of membrane	404	0.311362	1.26523	0.0234742	0.0234742	0.0639793	2698	tags=23%	list=16%	signal=20%	2669/6382/3579/3685/2185/100/4240/286/2785/2781/301/4897/6616/3140/2022/6277/2674/5064/80328/9516/5270/1946/3977/2786/54331/55068/785/9619/7852/5621/925/214/2774/3133/4885/3119/29126/2770/2779/3728/4684/57493/657/567/3597/7803/973/56928/929/57655/51554/29965/1917/255738/26119/166647/5997/390243/9630/8514/3675/7074/6234/23467/966/7036/9854/4036/460/3643/5605/10159/114908/5530/3627/5728/4217/2782/2…
BP	GO:0052547	regulation of peptidase activity	337	0.311278	1.24541	0.0359712	0.0359712	0.0835384	2078	tags=16%	list=12%	signal=15%	124857/4193/341676/2810/1294/7483/26999/2192/5366/55367/2621/6622/8795/9314/2043/27344/5270/1509/10406/340485/2934/5698/2537/727/7448/1032/10392/1512/25816/84630/27113/6691/718/831/317/6195/9806/3491/3965/462/340267/581/1471/4804/6774/8434/27290/23151/117584/51065/5054/4824/2903/1410/572
BP	GO:0006631	fatty acid metabolic process	328	0.310704	1.23844	0.0424757	0.0424757	0.0922988	1778	tags=14%	list=11%	signal=13%	5166/51390/240/113612/1056/1268/301/4023/54677/2678/6622/7132/9536/114757/8605/1907/55301/3248/8529/285440/7352/126129/79152/80221/28965/53632/283927/224/79966/4051/634/2053/5565/10891/718/6785/4644/5564/8824/23305/79993/242/2687/83667/32/1374/9663
BP	GO:0010720	positive regulation of cell development	496	0.310008	1.27623	0.0150289	0.0150289	0.0494197	2268	tags=19%	list=14%	signal=17%	9638/3398/5803/54209/2185/22941/1813/9001/1268/389658/59284/6457/5121/1435/4035/9231/1746/114798/5915/3280/4897/5365/3976/55754/816/23654/2043/4135/3169/5270/8829/1946/257194/51761/7852/9863/8322/4131/10512/5362/6794/22902/5979/4747/79791/4851/440730/22954/25893/84630/65981/5364/10221/2624/56965/4780/7161/127833/9148/51760/10362/50618/8175/8321/22849/23499/4804/147040/2119/7305/5997/9585/3675/232…
BP	GO:0002521	leukocyte differentiation	414	0.309862	1.26264	0.0233918	0.0233918	0.0639771	1752	tags=14%	list=11%	signal=12%	3635/760/3398/4254/10461/8744/54209/2185/10202/100/5295/6778/2353/3725/1435/301/2322/2621/3976/4853/1969/7163/28514/55294/150372/9644/9580/7535/925/26022/6794/51043/84959/7071/634/10221/2624/56998/359948/5578/4179/3516/3965/581/567/29887/973/6774/7305/7301/9452/23228/9398/6932/171392/5925
BP	GO:0045787	positive regulation of cell cycle	348	0.309809	1.24158	0.0407186	0.0407186	0.0895276	2375	tags=16%	list=14%	signal=14%	10769/1026/3398/4193/4488/2810/1813/1647/22924/55367/301/3280/3169/1820/144455/7832/1263/55124/7480/414194/5934/9236/55719/22954/28984/153241/25946/7039/5578/7161/4194/581/5017/11113/8061/81620/3481/9585/4926/5925/5889/994/51203/6990/3643/4824/6840/472/1845/22933/8812/29127/51512/51499/85459/5111/1027
BP	GO:0009617	response to bacterium	421	0.309676	1.2609	0.0223529	0.0223529	0.0621388	1388	tags=11%	list=8%	signal=10%	2823/56977/3587/5144/4842/54209/1268/1373/2353/3725/133/4023/2678/6622/7132/9536/3140/8349/23208/161145/58985/1969/8493/9516/5724/7425/3248/11145/10133/1535/55603/7431/9572/10392/566/3133/4851/4790/10221/10891/718/29126/5578/3516/3965/55008/567
BP	GO:0007015	actin filament organization	374	0.3096	1.24953	0.0295508	0.0295508	0.0728792	1974	tags=16%	list=12%	signal=14%	10602/23671/83715/342184/8522/27295/2185/2006/5295/58480/10580/2059/9639/256949/3693/8829/6711/144347/2934/84952/100533183/9050/22902/5999/55243/822/389/9172/5880/22998/28984/388/88/4430/390/11113/57619/120/57482/11346/79778/55160/23221/11034/87/29767/22921/9938/119/23242/3397/3636/11013/4607/11078/57553/51332/221692/203228
BP	GO:0032970	regulation of actin filament-based process	353	0.308866	1.23888	0.0384154	0.0384154	0.0863367	2421	tags=18%	list=15%	signal=16%	10602/23671/57822/5144/342184/122786/2185/2006/5295/58480/4035/2059/9639/256949/487/4853/50848/134/8829/6711/1946/2934/5999/55243/7134/822/817/389/22998/28984/388/88/3728/390/6331/11113/120/57482/11346/55160/23221/11034/29767/119/9722/3397/11013/4607/10142/11078/51332/11214/57551/203228/29085/5154/5734/6262/5829/6385/10163/1265/585
BP	GO:0051493	regulation of cytoskeleton organization	495	0.308761	1.27044	0.0196987	0.0196987	0.0585571	2842	tags=19%	list=17%	signal=17%	10769/10602/23671/57822/83715/342184/2185/2006/5295/22924/58480/4035/2059/9639/256949/8850/4133/6622/4853/50848/4135/24139/8829/6711/1946/57662/2934/4131/10297/81551/126731/5999/55243/822/389/22998/28984/22994/153241/5364/388/2770/11186/4751/88/390/11113/120/57482/11346/55160/23221/11034/29767/119/4926/5347/3397/11013/6491/10142/11078/51332/11214/57551/203228/25999/29085/10382/89927/6249/5154/573…
BP	GO:0016055	Wnt signaling pathway	481	0.308164	1.2662	0.0173812	0.0173812	0.0541215	3065	tags=23%	list=18%	signal=20%	55959/57822/6382/22881/10461/5145/1813/7483/5800/7091/1363/4035/2308/374946/9368/25805/5218/79816/59352/9314/3487/5158/51421/4139/81839/3489/5698/54331/9863/1649/8322/10297/7480/166/6794/4919/4851/4790/406/10413/65981/7316/10076/56998/6662/7089/3516/53944/3728/8323/80139/85409/8321/4343/801/8994/23499/154810/8434/80326/7301/6932/3675/7074/90410/79960/4038/55366/1453/8932/10159/5530/6663/205147/55…
BP	GO:0198738	cell-cell signaling by wnt	483	0.30791	1.26597	0.0173611	0.0173611	0.0541215	3065	tags=23%	list=18%	signal=19%	55959/57822/6382/22881/10461/5145/1813/7483/5800/7091/1363/4035/2308/374946/9368/25805/5218/79816/59352/9314/3487/5158/51421/4139/81839/3489/5698/54331/9863/1649/8322/10297/7480/166/6794/4919/4851/4790/406/10413/65981/7316/10076/56998/6662/7089/3516/53944/3728/8323/80139/85409/8321/4343/801/8994/23499/154810/8434/80326/7301/6932/3675/7074/90410/79960/4038/55366/1453/8932/10159/5530/6663/205147/55…
BP	GO:0022604	regulation of cell morphogenesis	452	0.307901	1.26381	0.0219907	0.0219907	0.0615927	1957	tags=17%	list=12%	signal=16%	3792/10602/1136/2185/161176/5800/58480/59284/4035/2192/2059/374946/85442/301/9368/25805/114798/4897/5365/4133/816/23654/2043/5064/4135/2633/8829/1946/23136/23111/7852/23237/8322/4131/10512/1808/5362/6794/22902/343472/5979/389/4649/4747/79791/65981/5364/388/89846/25791/56965/127833/26052/390/51760/50618/114793/3679/2049/57619/23105/57464/4343/393/8994/23499/4804/3397/7074/157285/8874/3249/11078/22…
BP	GO:0006914	autophagy	472	0.306838	1.26251	0.0207612	0.0207612	0.0599568	3338	tags=22%	list=20%	signal=18%	10769/81846/9638/3587/132671/26353/23255/54209/1813/9001/2308/27244/9531/6622/143686/90427/534/115201/340485/55294/10346/257397/10133/1649/1263/54832/81631/6794/89849/53632/10392/94241/5565/3708/55332/10891/79156/340371/128338/535/155066/5564/58528/149371/84557/523/54463/25827/1917/6774/4077/23677/83667/5305/93974/5660/55054/90410/4734/8878/203228/472/572/207063/53349/22933/26249/80700/25782/8536…
BP	GO:0061919	process utilizing autophagic mechanism	472	0.306838	1.26251	0.0207612	0.0207612	0.0599568	3338	tags=22%	list=20%	signal=18%	10769/81846/9638/3587/132671/26353/23255/54209/1813/9001/2308/27244/9531/6622/143686/90427/534/115201/340485/55294/10346/257397/10133/1649/1263/54832/81631/6794/89849/53632/10392/94241/5565/3708/55332/10891/79156/340371/128338/535/155066/5564/58528/149371/84557/523/54463/25827/1917/6774/4077/23677/83667/5305/93974/5660/55054/90410/4734/8878/203228/472/572/207063/53349/22933/26249/80700/25782/8536…
BP	GO:0031667	response to nutrient levels	433	0.306371	1.25226	0.027972	0.027972	0.0704318	2842	tags=20%	list=17%	signal=17%	9518/5166/8614/1026/4193/100/1268/1373/3725/5366/467/2308/133/27244/4023/2621/143686/27344/8493/7425/3371/2696/1938/2520/2934/5020/352954/2730/1649/1535/1030/4131/7352/81631/7349/1032/10518/7071/8805/122622/10891/317/80315/4780/2729/462/26263/58528/84557/7298/121278/255738/167359/54407/83667/32/5723/3651/6678/4925/3745/3992/8932/53349/22933/4049/3627/5728/4217/57407/8658/5111/51548/585/22953/5563…
CC	GO:0005813	centrosome	491	0.305667	1.25751	0.0243056	0.0243056	0.0643682	3766	tags=30%	list=23%	signal=24%	10769/9638/27241/5144/387119/9001/10580/10544/9639/8850/54970/9659/57662/8999/80071/1263/126731/582/22897/23194/26005/51364/79791/9738/28984/22994/153241/65981/9094/2770/51361/4780/84936/51626/4751/50618/58528/11127/29887/64770/56928/801/11004/9814/3796/84333/28981/9702/55212/9585/4926/10806/5347/3397/399693/6491/54820/10142/576/90410/598/994/7516/11258/5108/22995/1453/3161/84056/6249/22933/4957/…
BP	GO:0007265	Ras protein signal transduction	420	0.30544	1.24515	0.0328638	0.0328638	0.078112	2378	tags=19%	list=14%	signal=16%	10769/10602/2247/1026/4254/50650/9844/58480/3725/1435/2059/9639/9289/4853/10451/9363/7410/8829/326624/23362/23101/389/4851/440730/5880/9411/143872/55701/81848/221178/388/89846/25791/84033/57799/11186/50649/390/128239/5337/57493/50618/23229/26230/55160/2859/23221/393/57480/4804/9266/64787/3675/5925/7074/157285/5912/53358/8874/5873/3084/23370/11214/8729/8878/25759/1029/7409/6016/8844/2782/5865/2539…
BP	GO:0002791	regulation of peptide secretion	388	0.305125	1.23353	0.0428062	0.0428062	0.0923219	2215	tags=16%	list=13%	signal=15%	43/10874/3747/654346/54209/1813/1268/4035/776/301/4023/2621/6616/23208/2633/134/6711/1946/2696/2922/9619/727/9572/307/7349/3382/3133/406/3783/3098/28984/23705/3708/29126/94121/58515/5578/23178/3965/965/18/55638/929/3556/5950/1374/7074/1815/7036/3651/152/9854/51092/322/55366/3799/3745/336/29085/572/5530/5734/55612/112744
BP	GO:0043254	regulation of protein-containing complex assembly	403	0.304092	1.2351	0.0352113	0.0352113	0.0822878	3818	tags=25%	list=23%	signal=20%	10602/638/342184/2185/1643/2006/3931/22924/5366/2059/112476/256949/4133/6622/90427/24139/6711/63908/11076/57662/2934/114088/4131/7480/55243/822/389/6812/57600/55719/84630/56998/55355/57763/581/120/57482/23221/81620/29767/119/4926/5925/11013/10142/11078/51673/5601/51332/25999/472/10382/1410/6249/9557/5734/22933/29997/1027/55755/585/9535/23271/948/23176/5899/4478/5590/6850/1191/23514/3936/375/10109…
BP	GO:1903827	regulation of cellular protein localization	500	0.303231	1.24965	0.0253456	0.0253456	0.0657063	3195	tags=24%	list=19%	signal=20%	146395/4193/23255/347/54209/2810/5295/26154/58480/10580/4035/5366/10347/2621/9531/4133/3976/55754/23208/9648/1969/26229/2633/6711/83593/55294/2934/23237/5621/1263/26022/6794/22902/9201/440730/5880/22994/27113/4000/166614/6830/2770/5784/7161/88/3728/85409/127933/79778/26993/81620/4804/2817/163882/26119/9847/7305/112609/9585/4926/8514/83667/5347/3675/5925/93974/598/1815/9478/8729/8878/51465/4038/19…
BP	GO:0009991	response to extracellular stimulus	464	0.302115	1.24178	0.0289017	0.0289017	0.0719495	2842	tags=21%	list=17%	signal=18%	9518/5166/8614/1026/4193/100/1268/1373/2353/3725/5366/467/2308/133/27244/4023/2621/143686/27344/8493/7425/3371/2696/1938/2520/2934/5020/352954/2730/1649/1535/1030/4131/7352/166/81631/7349/1032/10518/7071/8805/875/122622/10891/55270/317/80315/4780/2729/462/26263/58528/84557/7298/8061/121278/255738/167359/54407/83667/32/5723/3651/6678/4925/3745/3992/8932/53349/58/22933/4049/3627/5728/4217/57407/865…
BP	GO:0002790	peptide secretion	499	0.30175	1.24382	0.0310702	0.0310702	0.0752937	2215	tags=16%	list=13%	signal=15%	43/10874/3747/6623/654346/54209/3685/55240/1813/1268/1363/4035/776/301/4023/2621/6616/23208/2633/134/7425/6711/869/1946/2696/2922/9619/727/389692/9572/307/7349/51043/3382/3133/4851/27445/406/3783/3098/28984/23705/3708/10758/29126/94121/58515/4644/5578/594855/3516/23178/3965/965/18/55638/929/3556/5950/1374/63941/7074/399979/1815/7036/3651/152/9854/51092/322/55366/3799/3745/26286/336/29085/572/5530…
BP	GO:1903706	regulation of hemopoiesis	400	0.300984	1.22196	0.0457746	0.0457746	0.095377	1752	tags=13%	list=11%	signal=12%	3635/760/3398/4254/8744/54209/2185/100/5295/116151/2353/3725/1435/301/8850/2621/3280/3976/4853/54681/28514/653604/55294/150372/5698/9580/7535/51043/84959/7071/4851/634/10413/25893/182/10221/2624/56998/4780/5578/7161/4179/3965/554313/567/4343/6774/58508/7305/9398/171392/5925
BP	GO:0050865	regulation of cell activation	427	0.300907	1.22751	0.0442375	0.0442375	0.0933961	3066	tags=22%	list=18%	signal=18%	3635/1026/3398/10461/8744/654346/54209/2294/100/5295/1268/6778/301/9231/2621/221395/3280/6622/10451/114757/5270/5724/150372/2934/9580/7535/6813/5621/9572/1326/51043/84959/6812/3133/5880/11117/634/84630/2624/6830/29126/6195/58515/5578/2729/4179/3965/1947/10457/18/3481/825/7305/7301/57126/1948/140885/472/572/8943/7409/5154/1845/814/5573/27342/6385/8660/26191/4323/677/64109/10459/10039/6347/3684/558…
BP	GO:1901615	organic hydroxy compound metabolic process	471	0.300459	1.2354	0.0334873	0.0334873	0.0792559	2135	tags=15%	list=13%	signal=14%	5745/3635/26031/2247/3293/9249/117283/2185/1056/1813/3931/2232/50700/6620/3628/3988/6622/1428/134429/5724/6528/340485/8529/9619/220/54884/285440/9572/2055/27284/8867/224/1644/4051/4790/2053/9108/130367/10826/55163/8811/5360/6526/4644/79947/151056/18/84812/27233/121278/801/255738/5950/26119/6490/29881/23228/9677/32/2643/3636/23541/3249/1815/4036/3158/51477/114876/10858/336/2903/3631/5007
BP	GO:0015711	organic anion transport	410	0.30035	1.22207	0.0433763	0.0433763	0.0926306	2675	tags=23%	list=16%	signal=20%	26266/760/6507/24/1813/26154/301/27165/9368/54677/10347/6622/9058/6616/55754/9600/388662/9900/114884/134/6567/8497/51761/5020/9498/8529/84230/9619/10079/5999/126129/2055/624/6511/28965/6812/3783/634/5565/9120/5360/388121/374868/121601/11230/18/80765/6512/23428/123096/113235/284439/5997/54407/32/1374/9057/5660/1815/9123/1836/9854/4036/10599/153768/6529/117247/5321/336/151473/771/133418/10499/1468/…
BP	GO:0090066	regulation of anatomical structure size	453	0.300173	1.23191	0.0336037	0.0336037	0.0792693	2300	tags=17%	list=14%	signal=15%	3792/10602/4842/342184/2185/2006/6560/1373/80852/4035/2059/374946/133/9368/256949/4897/4133/10451/1907/7410/134/5724/8829/6711/1946/2934/23111/2730/4131/10512/1808/22902/343472/2055/7349/55243/624/822/5979/4747/3783/2053/143872/2729/88/128239/11113/120/57482/23105/23221/11034/393/4880/23499/29767/9990/3778/5997/119/59/2643/11013/11078/51332/152/80128/7409/114908/219537/112/80005/10509/5728/5865/1…
BP	GO:0016049	cell growth	439	0.298358	1.22041	0.0431235	0.0431235	0.092445	2572	tags=20%	list=15%	signal=17%	3490/1026/3872/2810/2185/6586/26999/59284/4035/374946/4897/4133/2273/2016/3487/5270/6446/8829/323/1839/1946/780/6386/23136/6595/2786/23111/7852/1535/4131/10512/1808/6794/22902/343472/5999/214/7349/123879/817/1032/9201/634/22954/27346/65981/6195/127833/6662/55840/51760/50618/10516/23105/3913/393/23499/2137/23677/5997/83667/23242/5925/7074/3249/79960/11214/1029/322/203228/64061/80128/1410/10110/956…
BP	GO:0006091	generation of precursor metabolites and energy	483	-0.243084	-1.15578	0.0289855	0.0289855	0.0719626	4664	tags=37%	list=28%	signal=27%	4899/83733/1350/5501/7388/84277/7167/5315/79751/1737/5230/11331/219/348995/84275/4725/514/387/207/4776/6391/4700/4927/9818/26330/4708/1329/87178/9551/9238/2584/5290/5313/3620/217/2877/4191/10131/84300/5261/254013/5663/2235/648791/79611/54539/57019/9972/25796/84419/5223/5162/2023/522/201626/8013/1352/11182/54729/57122/5499/10476/2936/90624/5160/5256/38/6120/112812/622/55526/215/6715/4697/27166/511…
BP	GO:0007389	pattern specification process	394	-0.26432	-1.22368	0.0194805	0.0194805	0.0583705	2496	tags=23%	list=15%	signal=20%	389549/7703/6935/25914/2263/7473/6615/3670/6911/55036/6434/4041/79809/5013/388591/25806/441478/59343/92344/6899/3238/9620/84504/7855/10220/5567/5089/4762/3222/3226/57534/2926/4838/6045/10409/4681/444/3232/3200/90/10006/26585/2735/23432/134701/6939/138162/23314/199699/2296/658/655/4825/8022/3206/9839/6495/8701/9355/54567/55130/55897/6722/7026/50937/5916/8557/7704/9241/8642/3207/5046/54345/10716/51…
BP	GO:0032259	methylation	338	-0.272619	-1.25592	0.0239521	0.0239521	0.0641936	5188	tags=41%	list=31%	signal=29%	29063/23028/59335/260294/55621/79918/4839/23476/151194/6419/55471/387338/25962/79091/55011/4089/84661/54931/30827/399818/154743/51605/79133/54482/2091/80335/57721/63899/1312/11185/191/51504/2107/23378/5290/55170/11091/28989/63978/8726/79723/4221/25895/23067/54888/254013/59336/54554/65990/138199/7172/57019/57570/79624/5929/196074/79609/81627/7936/8731/10664/55352/7490/54815/64754/1789/9836/127253/…
BP	GO:0003002	regionalization	299	-0.28422	-1.2836	0.0106383	0.0106383	0.0391383	2328	tags=23%	list=14%	signal=21%	2263/7473/6615/3670/6911/6434/4041/79809/5013/25806/441478/59343/92344/6899/9620/84504/7855/10220/5567/5089/4762/3222/3226/57534/2926/4838/6045/10409/4681/3232/3200/90/10006/26585/2735/23432/134701/6939/2296/658/4825/8022/3206/9839/6495/9355/54567/55897/6722/7026/50937/5916/8557/7704/9241/3207/5046/10716/5100/6015/6423/3234/3224/3202/3237/10683/6092/3236/3235/3239
CC	GO:0000790	nuclear chromatin	347	-0.28778	-1.3217	0.00588235	0.00588235	0.0291206	5125	tags=39%	list=31%	signal=28%	83444/29998/9095/3149/1060/84464/7157/6749/65980/6256/58516/8467/4089/10933/6938/8607/10467/4149/3066/121504/6874/7290/6605/8357/4678/79892/6599/54617/8846/86/8626/8928/10370/8726/4221/8362/2551/3726/375757/84148/8365/5888/3183/64710/197342/8353/10445/5457/6950/25842/51755/661/1857/10661/1457/54556/54815/8364/92815/10042/10361/1677/9464/3146/25855/3065/125476/8337/723790/1104/404281/51377/3622/77…
BP	GO:0016458	gene silencing	217	-0.290149	-1.25811	0.0217391	0.0217391	0.0611955	5383	tags=40%	list=32%	signal=27%	10014/6396/5440/4686/54456/8575/8087/7040/1017/79670/79753/7157/10933/84759/5439/55051/121504/1994/348995/7290/8357/4927/9818/8318/5438/389421/8726/8362/9125/8365/9972/8353/90459/4086/5436/29883/10526/26523/25842/57122/126374/4855/84872/3159/8364/23511/22955/3146/23279/79023/55706/1981/7703/8737/5460/5435/57510/7247/8351/8086/4524/51490/129401/122402/10269/8358/5437/84962/23408/5604/22916/8367/10…
BP	GO:0032200	telomere organization	165	-0.294456	-1.2552	0.0498084	0.0498084	0.102166	4921	tags=37%	list=30%	signal=26%	84464/10694/7874/5981/80119/5422/5595/9937/11284/121504/6119/8357/10728/5558/2547/8362/5984/9134/22948/8365/5888/3183/7013/8353/79991/6950/26354/55869/8364/64282/5892/7486/64858/55651/3184/50485/220064/8351/167227/54552/8358/5073/85456/3326/8367/6672/92345/8360/55226/51750/100134934/8356/1736/7015/4683/135458/54433/8370/79008/8350/8363
BP	GO:0008406	gonad development	189	-0.295156	-1.26307	0.0371901	0.0371901	0.0848115	2078	tags=17%	list=12%	signal=15%	8894/5914/132625/2796/22836/51804/10409/3623/6665/30812/2296/2316/4521/658/596/3206/8893/3625/8372/3207/431707/3417/400629/5872/6299/10046/6423/2627/83943/1761/4257/6092/23414
BP	GO:0045137	development of primary sexual characteristics	194	-0.299408	-1.28716	0.0247934	0.0247934	0.0648782	2078	tags=18%	list=12%	signal=16%	8894/5914/132625/2796/10184/117/22836/51804/10409/3623/6665/30812/2296/2316/4521/658/596/3206/8893/3625/8372/3207/431707/3417/400629/5872/6299/10046/6423/2627/83943/1761/4257/6092/23414
BP	GO:0045165	cell fate commitment	225	-0.305911	-1.33963	0.0125523	0.0125523	0.0442801	2359	tags=23%	list=14%	signal=20%	8324/2263/7473/2139/3670/6911/6666/5460/4286/5914/10253/6899/84504/4762/3226/4838/4854/90/2116/30812/23314/84695/639/100170841/596/4825/8022/6495/64919/6913/2619/54567/10215/55897/7026/50937/3207/5629/54345/64641/10716/3110/6423/2627/2034/5396/6910/4656/3236/2596/55553/10630
BP	GO:0048736	appendage development	161	-0.307847	-1.31015	0.0299625	0.0299625	0.0732464	1785	tags=19%	list=11%	signal=17%	3238/6474/2201/5089/3226/444/27173/26585/658/655/3206/50515/51776/7026/5916/7704/7020/9241/1749/100131390/3207/6299/344191/6423/5396/6910/3655/83999/3236/3235/3239
BP	GO:0060173	limb development	161	-0.307847	-1.31015	0.0299625	0.0299625	0.0732464	1785	tags=19%	list=11%	signal=17%	3238/6474/2201/5089/3226/444/27173/26585/658/655/3206/50515/51776/7026/5916/7704/7020/9241/1749/100131390/3207/6299/344191/6423/5396/6910/3655/83999/3236/3235/3239
BP	GO:0016441	posttranscriptional gene silencing	150	-0.308249	-1.30063	0.0436364	0.0436364	0.0930078	5530	tags=44%	list=33%	signal=30%	4088/8480/65080/6396/5440/54456/8575/8087/7040/79670/79753/7157/5439/55051/121504/1994/348995/8357/4927/9818/5438/389421/8362/8365/9972/8353/4086/5436/29883/10526/26523/57122/126374/4855/84872/8364/23511/23279/79023/55706/1981/8737/5460/5435/57510/7247/8351/8086/51490/129401/10269/8358/5437/84962/5604/8367/6895/5432/8360/8356/7015/80149/81929/8370/8350/8363
BP	GO:0035195	gene silencing by miRNA	141	-0.308907	-1.2787	0.046595	0.046595	0.0967247	4559	tags=44%	list=27%	signal=32%	4088/8480/65080/6396/5440/8575/8087/7040/79670/79753/7157/5439/121504/1994/348995/8357/4927/9818/5438/389421/8362/8365/9972/8353/4086/5436/29883/10526/26523/57122/126374/4855/84872/8364/23511/23279/79023/55706/1981/8737/5460/5435/57510/8351/8086/51490/129401/10269/8358/5437/84962/5604/8367/6895/5432/8360/8356/80149/81929/8370/8350/8363
BP	GO:0071826	ribonucleoprotein complex subunit organization	193	-0.312245	-1.34456	0.0203252	0.0203252	0.0591573	3789	tags=29%	list=23%	signal=23%	8668/55299/4809/6204/79084/26121/26523/55692/54475/6936/50628/1207/6426/11218/8562/51187/55794/79833/10907/58155/8487/6637/9092/22868/79577/8669/6732/79760/79752/8894/51154/6633/55052/26747/56342/54680/6134/55164/3326/54960/6636/25929/23212/6895/728689/29777/6631/92345/8663/57461/65003/102724159/6123/84154/6635/6632
CC	GO:0005766	primary lysosome	131	-0.313261	-1.28508	0.0440678	0.0440678	0.0933628	1206	tags=15%	list=7%	signal=14%	9545/411/51316/2171/203068/8773/7276/81567/10396/968/8895/8417/8635/55313/2040/201294/23593/10493/4257
CC	GO:0042582	azurophil granule	131	-0.313261	-1.28508	0.0440678	0.0440678	0.0933628	1206	tags=15%	list=7%	signal=14%	9545/411/51316/2171/203068/8773/7276/81567/10396/968/8895/8417/8635/55313/2040/201294/23593/10493/4257
BP	GO:0035194	post-transcriptional gene silencing by RNA	149	-0.314252	-1.32037	0.0332103	0.0332103	0.0787676	5530	tags=44%	list=33%	signal=30%	4088/8480/65080/6396/5440/54456/8575/8087/7040/79670/79753/7157/5439/55051/121504/1994/348995/8357/4927/9818/5438/389421/8362/8365/9972/8353/4086/5436/29883/10526/26523/57122/126374/4855/84872/8364/23511/23279/79023/55706/1981/8737/5460/5435/57510/7247/8351/8086/51490/129401/10269/8358/5437/84962/5604/8367/6895/5432/8360/8356/7015/80149/81929/8370/8350/8363
CC	GO:0005759	mitochondrial matrix	452	-0.314441	-1.472	0.00724638	0.00724638	0.0304823	5479	tags=51%	list=33%	signal=35%	5095/65080/7263/79587/51258/54949/64960/57001/27034/81689/11315/112817/109703458/3313/10157/85476/79736/55006/9997/122961/4720/1738/11232/65005/4706/11112/7157/55471/57038/84869/387338/2806/64975/92399/2744/60488/326625/26284/7284/51081/54931/8505/23203/10965/60528/23597/1737/5096/51095/116447/219/339983/79731/514/63899/57546/9553/55157/9238/23438/6832/23395/29074/217/53343/4191/10240/7019/10131/…
BP	GO:0006941	striated muscle contraction	153	-0.314685	-1.33118	0.0295203	0.0295203	0.0728792	1541	tags=23%	list=9%	signal=21%	10021/79784/3759/481/1193/54795/5608/8913/55151/6769/2316/6546/7139/6717/9456/147/6901/246329/5318/2281/1140/781/80149/9992/8557/287/2257/23327/10324/124093/1134/4635/342667/2946/6444
CC	GO:0044391	ribosomal subunit	184	-0.31665	-1.35816	0.02	0.02	0.0588678	4115	tags=28%	list=25%	signal=21%	29074/10240/11222/64965/122704/51650/6204/23107/6183/54948/51073/6150/63875/65993/5935/26589/51187/6156/57129/55168/9801/51023/28973/54534/51263/115416/56945/51373/29088/28977/79590/51642/64951/55052/55173/6134/64976/25929/92259/64928/28998/51069/65003/6123/84769/29093/65008/28957/84311/3039/3040
BP	GO:0035107	appendage morphogenesis	132	-0.319986	-1.316	0.0273973	0.0273973	0.0695689	1785	tags=20%	list=11%	signal=18%	3238/6474/2201/5089/3226/444/658/655/3206/50515/51776/5916/7704/7020/9241/1749/100131390/3207/6299/344191/6423/5396/6910/3236/3235/3239
BP	GO:0035108	limb morphogenesis	132	-0.319986	-1.316	0.0273973	0.0273973	0.0695689	1785	tags=20%	list=11%	signal=18%	3238/6474/2201/5089/3226/444/658/655/3206/50515/51776/5916/7704/7020/9241/1749/100131390/3207/6299/344191/6423/5396/6910/3236/3235/3239
BP	GO:0022618	ribonucleoprotein complex assembly	186	-0.32041	-1.37705	0.012	0.012	0.0428745	3882	tags=30%	list=23%	signal=23%	8668/55299/4809/6204/79084/26121/26523/55692/54475/6936/50628/1207/6426/11218/8562/51187/55794/79833/10907/58155/8487/6637/9092/22868/79577/8669/6732/79760/8894/51154/6633/55052/26747/56342/54680/6134/55164/3326/54960/6636/25929/23212/6895/728689/29777/6631/92345/8663/57461/65003/102724159/6123/84154/6635/6632
BP	GO:0009952	anterior/posterior pattern specification	182	-0.321183	-1.37814	0.019685	0.019685	0.0585571	1796	tags=22%	list=11%	signal=20%	6899/9620/7855/10220/4762/3222/3226/57534/2926/4838/6045/10409/3232/3200/10006/134701/6939/2296/3206/9839/55897/6722/7026/50937/5916/8557/7704/9241/3207/5046/5100/6015/6423/3234/3224/3202/10683/3236/3235/3239
BP	GO:0045333	cellular respiration	176	-0.321865	-1.37134	0.0240964	0.0240964	0.0641936	5425	tags=48%	list=33%	signal=33%	54949/11315/6834/9016/4718/4720/1738/11232/4706/1340/4717/89/4713/4698/51079/83733/1350/7388/79751/1737/4725/4776/6391/4700/4708/1329/87178/9238/5290/4191/10131/54539/5162/8013/1352/90624/5160/55526/4697/27166/51103/9650/4715/22868/6472/55967/4709/847/4726/6392/637/4704/4710/113115/79072/4729/55847/60493/246269/7381/4696/1349/388753/158/27089/790955/79675/4716/4712/2395/80219/1345/10514/863/2110/…
CC	GO:0019866	organelle inner membrane	490	-0.32249	-1.53641	0.00714286	0.00714286	0.0304214	5016	tags=44%	list=30%	signal=32%	5250/79944/1340/4717/2806/64975/4713/51629/647087/4698/60488/90580/51079/26284/4976/55037/51081/9556/26515/23203/83733/133308/1350/9941/7388/84277/79751/79133/9131/27235/11331/84275/1678/4725/514/401612/6391/4700/4001/3052/26521/4708/9553/1329/9551/54927/90871/57380/55101/7108/29074/10166/10240/10131/84300/11222/64965/81554/5663/2235/10245/122704/2356/51650/150290/83985/54539/221496/84419/5832/63…
BP	GO:0016202	regulation of striated muscle tissue development	118	-0.325096	-1.30095	0.0454545	0.0454545	0.0952935	2359	tags=23%	list=14%	signal=20%	8324/2263/8737/859/1432/6899/6474/51804/3720/5465/3776/57486/6665/26585/2735/596/2539/6495/50937/9241/10324/2627/6910/10211/4656/55553/23414
CC	GO:0042383	sarcolemma	130	-0.327721	-1.34604	0.0232558	0.0232558	0.0638525	1528	tags=22%	list=9%	signal=20%	3759/481/9499/5152/23603/84062/7414/6769/6546/6717/6513/27092/288/57716/246329/6445/64208/781/1292/287/493/124093/5239/6517/342667/10211/1000/6444
CC	GO:0015934	large ribosomal subunit	118	-0.32788	-1.31209	0.038961	0.038961	0.0866892	3468	tags=26%	list=21%	signal=21%	54948/51073/6150/63875/5935/26589/51187/6156/57129/55168/9801/54534/51263/115416/29088/28977/79590/51642/55052/6134/64976/25929/64928/28998/51069/65003/6123/84769/29093/65008/84311
BP	GO:0048634	regulation of muscle organ development	120	-0.329616	-1.32813	0.038961	0.038961	0.0866892	2359	tags=23%	list=14%	signal=20%	8324/2263/8737/859/1432/6899/6474/51804/3720/4762/5465/3776/57486/6665/26585/2735/596/2539/6495/50937/9241/10324/2627/6910/10211/4656/55553/23414
BP	GO:0008643	carbohydrate transport	125	-0.330948	-1.34511	0.029703	0.029703	0.0730927	3032	tags=30%	list=18%	signal=24%	5906/6253/6927/55974/29988/55032/84912/51763/5357/55198/2542/91869/23443/360/7355/1432/84879/113829/6524/148808/26503/252983/10237/3099/53916/2171/6513/5458/55343/6515/57210/2695/7015/85414/6517/28999/3667
BP	GO:0006334	nucleosome assembly	109	-0.336216	-1.3289	0.0392157	0.0392157	0.087082	2089	tags=21%	list=13%	signal=19%	8351/1616/54069/10541/55166/8358/378708/128312/55839/4869/8367/83743/8360/8356/8348/79711/8370/3008/8347/3006/8350/8340/8363
MF	GO:0008168	methyltransferase activity	207	-0.345964	-1.49961	0.0042735	0.0042735	0.0246024	5444	tags=53%	list=33%	signal=36%	79066/56979/83852/64863/79828/55006/29063/59335/260294/55621/79918/4839/151194/6419/55471/387338/79091/54931/30827/399818/154743/51605/79133/54482/2091/80335/57721/63899/1312/11185/51504/23378/55170/11091/28989/63978/8726/79723/4221/25895/23067/54888/254013/59336/65990/138199/7172/57019/57570/79624/5929/196074/79609/81627/8731/64754/1789/9836/127253/23070/55178/133383/84190/196483/55039/221143/13…
MF	GO:0016741	transferase activity	transferring one-carbon groups	217	-0.347112	-1.5051	0.00434783	0.00434783	0.0246024	5444	tags=52%	list=33%	signal=35%	79066/56979/83852/64863/79828/55006/29063/59335/260294/55621/79918/4839/151194/6419/55471/387338/79091/54931/30827/399818/154743/51605/79133/54482/2091/80335/57721/63899/1312/11185/51504/23378/55170/11091/28989/63978/8726/79723/4221/25895/23067/54888/254013/59336/65990/138199/7172/57019/57570/79624/5929/196074/79609/81627/2618/8731/64754/1789/9836/127253/23070/55178/6472/133383/84190/196483/55039…
CC	GO:0005743	mitochondrial inner membrane	437	-0.34927	-1.63059	0.00704225	0.00704225	0.0304214	5016	tags=47%	list=30%	signal=34%	5250/79944/1340/4717/2806/64975/4713/51629/647087/4698/60488/90580/51079/26284/4976/55037/51081/9556/26515/23203/83733/133308/1350/9941/7388/84277/79751/79133/9131/27235/11331/84275/1678/4725/514/401612/6391/4700/3052/26521/4708/9553/1329/9551/54927/90871/57380/55101/29074/10166/10240/10131/84300/11222/64965/81554/5663/2235/10245/122704/2356/51650/150290/83985/54539/84419/5832/6341/89874/10229/55…
CC	GO:0001650	fibrillar center	128	-0.351016	-1.43985	0.013289	0.013289	0.0448902	3814	tags=36%	list=23%	signal=28%	7013/5049/55810/79991/2101/51755/8991/9419/8731/6150/6875/9875/7341/1316/9825/125476/6629/2272/118487/79840/7334/9730/10892/5435/1875/26517/26747/401089/92856/30851/91543/4794/23212/55536/54751/6598/1736/6239/84135/345630/177/54433/2020/221895/4781/23034
BP	GO:0022904	respiratory electron transport chain	102	-0.352298	-1.38256	0.029316	0.029316	0.0726213	6015	tags=58%	list=36%	signal=37%	1355/54205/7384/4694/2108/9377/7386/57017/54949/11315/4718/4720/1738/11232/4706/1340/4717/4713/4698/51079/83733/1350/7388/79751/4725/6391/4700/4708/1329/54539/1352/4697/51103/4715/55967/4709/4726/6392/637/4704/4710/4729/246269/7381/4696/1349/388753/27089/790955/4716/4712/1345/10514/2110/2819/7915/6901/91942/83943
BP	GO:0030326	embryonic limb morphogenesis	112	-0.355975	-1.42225	0.0131148	0.0131148	0.0448902	1785	tags=21%	list=11%	signal=18%	3238/6474/2201/5089/3226/655/3206/50515/51776/5916/7704/7020/9241/1749/100131390/3207/6299/6423/5396/6910/3236/3235/3239
BP	GO:0035113	embryonic appendage morphogenesis	112	-0.355975	-1.42225	0.0131148	0.0131148	0.0448902	1785	tags=21%	list=11%	signal=18%	3238/6474/2201/5089/3226/655/3206/50515/51776/5916/7704/7020/9241/1749/100131390/3207/6299/6423/5396/6910/3236/3235/3239
BP	GO:0006119	oxidative phosphorylation	125	-0.3609	-1.46684	0.00990099	0.00990099	0.0370369	6015	tags=61%	list=36%	signal=39%	1355/54205/516/7384/4694/9377/7386/57017/517/30968/2631/54949/11315/27109/6834/79736/4718/4720/1738/4706/1340/4717/89/4713/4698/51079/1350/7388/84277/5230/84275/4725/514/387/6391/4700/4708/1329/9551/84300/54539/522/201626/1352/10476/215/4697/51103/509/4715/6472/518/55967/4709/4726/6392/637/4704/4710/134145/4729/246269/7381/4696/1349/538/388753/27089/790955/4716/4712/2395/1345/521/6901/4656
BP	GO:0098781	ncRNA transcription	104	-0.367586	-1.44048	0.013289	0.013289	0.0448902	5365	tags=42%	list=32%	signal=29%	5440/23379/4686/7157/26512/9014/55011/6884/5439/2959/5438/4141/84365/2971/5436/81556/2963/25926/55656/55726/11137/65123/129685/112495/5435/57508/1022/6882/84172/6617/55197/6908/8178/5437/6877/5451/80237/22916/2961/55756/10360/5432/6618/6598
CC	GO:0005681	spliceosomal complex	182	-0.368798	-1.58244	0.00393701	0.00393701	0.0241139	5244	tags=41%	list=31%	signal=29%	5356/9129/9775/102724594/57703/84811/8899/79753/11066/10713/56259/143884/23658/51340/10081/51691/3312/494115/140432/23450/6427/83443/3183/4809/26121/6626/10283/4670/55692/10492/6936/10236/85437/151903/6426/27258/55119/5935/9128/51639/55131/10907/58155/8487/9716/6637/9092/55234/6629/9410/11193/8449/988/9343/55110/6434/8220/10285/6633/84844/4116/199746/154007/6636/6627/51645/10465/6631/60625/57461/…
CC	GO:0034708	methyltransferase complex	111	-0.375073	-1.49353	0.00651466	0.00651466	0.0303855	5283	tags=42%	list=32%	signal=29%	55006/81887/2079/25962/84661/8607/30827/4149/3066/51605/6874/80335/57721/3054/11091/8726/4221/23067/54554/84148/79084/10445/26121/5929/8731/1207/6637/125476/84332/55628/3276/6633/124944/3720/56980/10785/54881/6045/83732/29104/6636/100170841/22976/79447/6635/115708/6632
BP	GO:0006414	translational elongation	131	-0.375787	-1.54158	0.00677966	0.00677966	0.0304214	5671	tags=58%	list=34%	signal=39%	219927/10884/51318/29904/65080/51258/1734/64960/85476/9775/54998/65005/64975/60488/26284/7284/55037/51081/60678/9147/9553/8846/54676/29074/10240/11222/64965/90850/6726/122704/51650/23107/6183/54948/51073/6150/63875/65993/92715/89978/26589/285381/100132911/51649/57129/55168/9801/51023/28973/54534/51263/118487/56945/51373/10102/29088/28977/79590/51642/1984/64951/55052/55173/64976/1802/92259/64928/1…
MF	GO:0016853	isomerase activity	141	-0.388498	-1.60816	0.00358423	0.00358423	0.0235028	3702	tags=38%	list=22%	signal=30%	5223/5768/4594/10283/26995/5481/169714/6120/54517/30001/6916/5238/285755/2288/3157/126789/3329/10954/10007/2954/5224/150962/5973/669/2289/113000/729020/84650/91734/11104/51303/23759/84881/27079/80324/2582/23071/1962/51645/10465/22934/5373/81567/4047/1736/2281/26035/283209/51661/51022/55033/5239/1638/60681
BP	GO:0090501	RNA phosphodiester bond hydrolysis	134	-0.394179	-1.61557	0.00358423	0.00358423	0.0235028	5706	tags=50%	list=34%	signal=33%	10171/81875/51692/79650/440400/10940/65080/64852/4686/246243/5394/11051/79621/65095/80746/11340/79033/79707/9941/60528/85441/5438/87178/8602/28960/53981/10248/90459/29883/201626/26523/28987/11102/5393/54512/10775/131870/51013/342618/90806/54913/55651/51110/7247/25996/23016/167227/56915/51367/51077/51010/5073/88745/22916/23212/29777/9692/84294/79897/8635/80149/2081/27340/10247/51728/116461/10799
MF	GO:0008757	S-adenosylmethionine-dependent methyltransferase activity	152	-0.394932	-1.66735	0.00367647	0.00367647	0.0236896	5503	tags=56%	list=33%	signal=38%	11105/79066/56979/83852/64863/79828/55006/29063/55621/79918/4839/151194/6419/55471/387338/79091/54931/30827/399818/154743/51605/2091/80335/57721/63899/1312/11185/51504/23378/55170/11091/8726/79723/4221/25895/23067/54888/254013/65990/138199/7172/57570/79624/5929/196074/79609/81627/8731/64754/1789/23070/55178/133383/196483/221143/134145/24140/1787/10436/93587/64216/220074/114049/3276/57412/10785/10…
BP	GO:0060964	regulation of gene silencing by miRNA	104	-0.397293	-1.55689	0.00332226	0.00332226	0.0232237	4559	tags=42%	list=27%	signal=31%	121504/1994/348995/8357/4927/9818/5438/8362/8365/9972/8353/5436/10526/26523/57122/126374/84872/8364/23511/23279/79023/55706/1981/8737/5460/5435/8351/8086/129401/10269/8358/5437/84962/5604/8367/6895/5432/8360/8356/80149/81929/8370/8350/8363
BP	GO:0060968	regulation of gene silencing	123	-0.397583	-1.61142	0.00651466	0.00651466	0.0303855	4559	tags=42%	list=27%	signal=31%	121504/1994/348995/7290/8357/4927/9818/8318/5438/8362/8365/9972/8353/5436/10526/26523/25842/57122/126374/84872/3159/8364/23511/23279/79023/55706/1981/8737/5460/5435/57510/8351/8086/129401/10269/8358/5437/84962/5604/8367/6895/5432/8360/8356/7015/80149/81929/8370/3008/3006/8350/8363
CC	GO:0000428	DNA-directed RNA polymerase complex	102	-0.400297	-1.57092	0.00325733	0.00325733	0.0232237	5365	tags=48%	list=32%	signal=33%	5440/2648/2965/10621/6881/2967/7157/6884/5422/5439/2959/11036/6874/64210/5558/5438/404672/6873/25885/5436/661/2963/6875/4172/9533/79577/4331/129685/5435/1022/171568/6882/8464/84172/10629/55197/6908/2966/55703/5437/6877/2961/5828/5432/728340/2968/10622/730394/51728
CC	GO:0032993	protein-DNA complex	170	-0.40135	-1.70935	0.00403226	0.00403226	0.0245623	3113	tags=28%	list=19%	signal=23%	8364/92815/4801/8341/8346/8337/723790/4172/92797/988/8332/6666/50485/8351/440093/6908/8358/5437/128312/4800/4869/8367/56848/8360/100134934/8356/8334/8329/3013/7015/8348/3207/9705/8370/317772/3008/8347/8335/3006/8350/3012/6910/8340/8363/4656/1388/8338
CC	GO:0055029	nuclear DNA-directed RNA polymerase complex	101	-0.402693	-1.57161	0.00326797	0.00326797	0.0232237	5365	tags=49%	list=32%	signal=33%	5440/2648/2965/10621/6881/2967/7157/6884/5422/5439/2959/11036/6874/64210/5558/5438/404672/6873/25885/5436/661/2963/6875/4172/9533/79577/4331/129685/5435/1022/171568/6882/8464/84172/10629/55197/6908/2966/55703/5437/6877/2961/5828/5432/728340/2968/10622/730394/51728
BP	GO:0060147	regulation of posttranscriptional gene silencing	107	-0.403725	-1.59293	0.00331126	0.00331126	0.0232237	4559	tags=43%	list=27%	signal=31%	121504/1994/348995/8357/4927/9818/5438/8362/8365/9972/8353/5436/10526/26523/57122/126374/84872/8364/23511/23279/79023/55706/1981/8737/5460/5435/57510/8351/8086/129401/10269/8358/5437/84962/5604/8367/6895/5432/8360/8356/7015/80149/81929/8370/8350/8363
BP	GO:0060966	regulation of gene silencing by RNA	107	-0.403725	-1.59293	0.00331126	0.00331126	0.0232237	4559	tags=43%	list=27%	signal=31%	121504/1994/348995/8357/4927/9818/5438/8362/8365/9972/8353/5436/10526/26523/57122/126374/84872/8364/23511/23279/79023/55706/1981/8737/5460/5435/57510/8351/8086/129401/10269/8358/5437/84962/5604/8367/6895/5432/8360/8356/7015/80149/81929/8370/8350/8363
CC	GO:0030880	RNA polymerase complex	105	-0.405569	-1.59099	0.00333333	0.00333333	0.0232237	5365	tags=48%	list=32%	signal=32%	5440/2648/2965/10621/6881/2967/7157/6884/5422/5439/2959/11036/6874/64210/5558/5438/404672/6873/25885/5436/661/2963/6875/4172/9533/79577/4331/129685/5435/1022/171568/6882/8464/84172/10629/55197/6908/2966/55703/5437/6877/2961/5828/5432/728340/2968/7015/10622/730394/51728
MF	GO:0140098	catalytic activity	acting on RNA	359	-0.416803	-1.91532	0.00606061	0.00606061	0.0291206	6058	tags=56%	list=36%	signal=36%	117246/10146/328/3396/22803/55783/10556/83707/23293/170506/54890/51634/11269/27292/3735/1973/10171/81875/51692/79650/152992/57604/440400/10940/65080/79066/79587/64852/5440/3035/79828/55006/54456/246243/11056/9775/5394/10621/29063/79621/391356/79670/55621/4839/57038/387338/80746/80119/57697/54931/2193/5439/79068/51520/56919/79033/9941/60528/85441/154743/51605/51095/54482/2091/79731/57721/54505/638…
BP	GO:0009451	RNA modification	158	-0.424729	-1.80567	0.00374532	0.00374532	0.023811	4570	tags=49%	list=27%	signal=36%	154743/51605/51654/54482/2091/55623/57721/63899/79691/51504/8846/83480/54888/64172/57570/196074/22929/26995/140564/11062/81627/55687/8731/131870/54517/285381/221120/9836/127253/23070/100132911/27304/55178/81605/54802/55039/126789/55651/24140/150962/6741/134637/1787/10436/93587/63892/113000/64216/23587/114049/54920/81890/348180/10785/84881/5073/27079/54522/80324/26610/51531/9692/200315/92345/55226…
CC	GO:0098800	inner mitochondrial membrane protein complex	120	-0.427863	-1.724	0.00324675	0.00324675	0.0232237	5351	tags=53%	list=32%	signal=36%	100652748/4718/4720/4706/4717/4713/4698/90580/51079/9556/26515/7388/4725/514/6391/4700/4708/9551/54927/90871/55101/10245/54539/84419/55735/522/10476/140823/79135/4697/51103/509/4715/100287932/10939/518/55967/4709/617/90550/4726/6392/4704/4710/4729/84833/7381/51025/4696/80273/440574/10440/27089/790955/4716/4712/521/196294/26519/84303/56901/131118/92609/83943
BP	GO:0022613	ribonucleoprotein complex biogenesis	420	-0.441635	-2.05664	0.00666667	0.00666667	0.0304214	4646	tags=44%	list=28%	signal=33%	22984/79033/8683/79707/51340/90121/154743/2091/55623/10728/4927/63899/6607/51602/317781/51504/1653/8602/404672/23378/2752/85865/64965/10248/2971/8668/65083/55299/4809/4931/6204/79084/55813/55661/90459/10412/26121/196074/26523/55692/28987/10969/54475/23481/5393/54512/6936/50628/10775/54853/1207/9188/6426/131870/11218/55272/51013/64434/8562/25926/84128/9875/153443/10199/51187/55794/79833/51575/8568…
CC	GO:0098798	mitochondrial protein complex	244	-0.465993	-2.05136	0.0044843	0.0044843	0.0252466	5769	tags=60%	list=35%	signal=40%	9377/28958/7386/517/219927/10884/134266/51318/345778/65080/51258/64960/100652748/4718/4720/4580/65005/4706/84134/4717/387338/64975/4713/4698/60488/90580/51079/51081/54931/9556/26515/23203/7388/1737/4725/514/6391/4700/63899/26521/4708/9553/87178/9551/54927/90871/55101/6832/29074/10240/11222/64965/10245/122704/51650/54539/10295/84419/55735/522/23107/6183/54948/10476/51073/6150/63875/65993/5164/4015…
BP	GO:0034660	ncRNA metabolic process	453	-0.468271	-2.19298	0.00719424	0.00719424	0.0304214	5486	tags=57%	list=33%	signal=39%	51002/10940/65080/79066/79587/80135/64852/27341/3035/115939/79828/55006/54456/81887/8575/11056/9775/5394/29063/260294/23195/79670/26156/55621/4839/57038/65095/26512/387338/9221/55011/80746/11340/54931/2193/51520/22984/79033/79707/60528/90121/154743/51605/51654/51095/54482/2091/79731/55623/63899/51602/317781/79691/51504/8846/55157/1653/87178/8602/4141/404672/23438/23378/389421/140432/23395/83480/8…
BP	GO:0034470	ncRNA processing	368	-0.486815	-2.24229	0.00621118	0.00621118	0.0295586	5745	tags=61%	list=34%	signal=41%	27292/3735/285855/10171/81875/84916/79650/84267/152992/25821/57604/4088/51002/10940/65080/79066/80135/64852/27341/115939/79828/55006/81887/8575/11056/9775/5394/29063/260294/23195/79670/26156/55621/4839/65095/26512/387338/9221/55011/80746/11340/54931/22984/79033/79707/60528/90121/154743/51605/51654/51095/54482/2091/55623/63899/51602/317781/79691/51504/8846/1653/8602/404672/23378/389421/140432/8348…
MF	GO:0140101	catalytic activity	acting on a tRNA	120	-0.495438	-1.99628	0.00324675	0.00324675	0.0232237	5609	tags=67%	list=34%	signal=45%	152992/57604/10940/79587/3035/79828/55006/391356/55621/57038/80746/54931/2193/79068/51520/60528/51605/51095/54482/79731/63899/79691/8846/55157/4141/23438/23395/83480/54888/10248/123283/2617/5188/57570/80755/11062/81627/11102/10775/25973/55253/441250/9836/127253/5917/55699/54913/54802/55039/92675/55278/1615/24140/150962/1787/93587/833/54920/51067/10352/92935/81890/51367/10785/51651/124454/10056/80…
BP	GO:0016072	rRNA metabolic process	220	-0.498731	-2.17539	0.00423729	0.00423729	0.0246024	5444	tags=59%	list=33%	signal=40%	79066/80135/27341/115939/55006/81887/11056/9775/5394/29063/260294/23195/26156/4839/65095/387338/9221/55011/11340/22984/79033/79707/90121/154743/2091/55623/63899/51602/317781/51504/8602/404672/23378/84365/64965/10248/65083/4809/4931/55813/55661/90459/10412/196074/28987/10969/23481/5393/54512/50628/10775/54853/9188/131870/55272/51013/25926/84128/9875/153443/10199/51575/8568/342618/55759/9092/51118/…
BP	GO:0042254	ribosome biogenesis	289	-0.506166	-2.28833	0.00510204	0.00510204	0.0274755	5283	tags=57%	list=32%	signal=40%	55006/81887/11056/9775/5394/29063/260294/23195/26156/4839/65095/387338/9221/55011/26284/11340/51081/84231/22984/79033/79707/90121/154743/2091/55623/4927/63899/51602/317781/51504/8602/404672/23378/2752/85865/64965/10248/2971/65083/55299/4809/4931/6204/55813/55661/90459/10412/196074/28987/10969/54475/23481/5393/54512/50628/10775/54853/9188/131870/55272/51013/64434/25926/84128/9875/153443/10199/5118…
BP	GO:0006364	rRNA processing	210	-0.508952	-2.204	0.00429185	0.00429185	0.0246024	5444	tags=60%	list=33%	signal=41%	79066/80135/27341/115939/55006/81887/11056/9775/5394/29063/260294/23195/26156/4839/65095/387338/9221/55011/11340/22984/79033/79707/90121/154743/2091/55623/63899/51602/317781/51504/8602/404672/23378/64965/10248/65083/4809/4931/55813/55661/90459/10412/196074/28987/10969/23481/5393/54512/50628/10775/54853/9188/131870/55272/51013/25926/84128/9875/153443/10199/51575/8568/55759/9092/51118/54913/64282/5…
BP	GO:0008033	tRNA processing	129	-0.525241	-2.15799	0.00326797	0.00326797	0.0232237	4617	tags=58%	list=28%	signal=42%	60528/51605/51654/51095/54482/55623/63899/79691/51504/8846/1653/83480/54888/9097/10248/64172/51637/57570/22929/11062/81627/11102/55687/10775/55253/54517/285381/441250/9836/127253/100132911/27304/54913/81605/54802/55039/112858/126789/24140/150962/6741/134637/1787/93587/63892/23587/54920/339487/283742/26024/81890/51367/348180/10785/2926/84881/54522/80324/26610/51531/9692/55226/55250/91801/54974/423…
BP	GO:0006415	translational termination	103	-0.531445	-2.08449	0.00327869	0.00327869	0.0232237	5671	tags=65%	list=34%	signal=43%	219927/2935/10884/51318/65080/51258/64960/327/54998/65005/64975/92399/55239/60488/26284/55037/51081/9553/51504/2107/29074/10240/11222/64965/122704/51650/23107/6183/54948/51073/6150/63875/65993/26589/51649/57129/55168/9801/51023/28973/54534/51263/118487/6059/56945/51373/9617/29088/28977/79590/51642/1984/64951/55052/55173/64976/29104/92259/64928/143244/28998/51069/65003/29093/65008/28957/84311
BP	GO:0032543	mitochondrial translation	135	-0.540998	-2.21472	0.0035461	0.0035461	0.0235028	5671	tags=69%	list=34%	signal=46%	219927/10884/55005/51318/65080/51258/64960/3035/51335/85476/54998/65005/4528/57038/387338/64975/92399/219402/60488/26284/7284/55037/51081/54931/51654/63899/9553/8846/55157/23395/29074/10240/84300/11222/64965/81554/122704/2617/5188/51650/26995/23107/6183/54948/51073/6150/63875/65993/26589/26164/51649/55699/22868/6472/57129/55168/9801/51023/28973/54534/51263/55278/118487/115416/79072/56945/51373/10…
BP	GO:0006399	tRNA metabolic process	182	-0.543936	-2.33393	0.00393701	0.00393701	0.0241139	4787	tags=62%	list=29%	signal=44%	11340/54931/2193/51520/60528/51605/51654/51095/54482/79731/55623/63899/79691/51504/8846/55157/1653/4141/23438/23395/83480/54888/9097/10248/64172/123283/2617/5188/51637/57570/80755/22929/11062/81627/11102/5393/55687/10775/25973/55253/54517/285381/441250/9836/127253/5917/100132911/27304/55699/118672/54913/81605/54802/55039/112858/126789/27068/92675/55278/1615/7965/24140/150962/6741/134637/1787/9358…
BP	GO:0140053	mitochondrial gene expression	162	-0.551255	-2.34748	0.0037594	0.0037594	0.023811	5671	tags=70%	list=34%	signal=47%	219927/10884/25821/55005/51318/65080/51258/64960/3035/51335/85476/79736/55006/54998/65005/4528/57038/387338/64975/92399/219402/60488/26284/7284/55037/51081/54931/60528/51654/51095/84275/63899/9553/8846/55157/87178/9238/6832/23395/29074/10240/7019/84300/11222/64965/81554/122704/2617/5188/51650/133522/57570/26995/23107/6183/54948/51073/6150/63875/65993/7978/26589/26164/51649/55699/22868/6472/57129/…
